# Supplementary material for: Rh(i)-catalysed imine-directed C–H functionalization via the oxidative [3 + 2] cycloaddition of benzylamine derivatives with maleimides
Source: Royal Society of Chemistry journal article supplement (doi:10.1039/d1cc06622f), 2021-12-22

## Supplementary Information

### Rh(I)-Catalysed Imine-Directed C-H Functionalization by the Oxidative [3+2] Cycloaddition of Benzylamine Derivatives with Maleimides

Amrita Das and Naoto Chatani\*

*Department of Applied Chemistry, Faculty of Engineering, Osaka University, Suita, Osaka  
560-0871, Japan*

*chatani@chem.eng.osaka-u.ac.jp*

#### Table of Contents

|                                                                                     |     |
|-------------------------------------------------------------------------------------|-----|
| 1. General information.....                                                         | S2  |
| 2. Materials.....                                                                   | S2  |
| 3. Preparation of substrates.....                                                   | S3  |
| 4. Optimization of reaction conditions with <b>1a</b> and <b>2a</b> (Table S1)..... | S12 |
| 5. Evaluation of directing groups (Table 1).....                                    | S14 |
| 6. Substrate scope (Table 2).....                                                   | S15 |
| 7. One-pot reaction between benzylamines and maleimides (Table 3).....              | S25 |
| 8. Mechanistic studies (1) (Scheme S1).....                                         | S26 |
| 9. Mechanistic studies (2) (Scheme S2).....                                         | S28 |
| 10. Reduction of pyrroline moiety of <b>3aa</b> (Scheme S3).....                    | S29 |
| 11. X-ray structural data of <b>3ap</b> and <b>3ea</b> .....                        | S30 |
| 12. References.....                                                                 | S37 |
| 13. <sup>1</sup> H and <sup>13</sup> C NMR spectra of new compounds.....            | S38 |

## 1. General information

All chemicals were measured and added to a sealed tube under argon atmosphere. The reaction tube was then closed and kept in an oil bath.  $^1\text{H}$  NMR (400 MHz),  $^{13}\text{C}\{^1\text{H}\}$  NMR (101 MHz), and  $^{19}\text{F}$  NMR (376 Hz) spectra were recorded on a JEOL ECS-400 spectrometer in  $\text{CDCl}_3$  with tetramethylsilane as an internal standard. All  $^1\text{H}$  NMR chemical shifts were recorded in ppm ( $\delta$ ) and referenced to tetramethylsilane. All  $^{13}\text{C}\{^1\text{H}\}$  NMR chemical shifts are given in ppm ( $\delta$ ) relative to carbon resonances in  $\text{CDCl}_3$  at  $\delta$  77.16. Infrared spectra (IR) were recorded on a JASCO FT/IR-4200 spectrometer using the ATR method. High resolution mass spectra (HRMS) were obtained using a JEOL JMS-700 spectrometer and recorded by EI using a double-focusing mass spectrometer. Melting points were determined using a Stanford Research Systems MPA100 apparatus equipped with a digital thermometer. Flash column chromatography was performed using  $\text{SiO}_2$  F60 (0.040–0.0663 mm, 230–400 mesh). Some compounds were isolated by LC-908 HPLC (GPC) or HPLC (Phenomenex Luna 5u Silica (2) 100  $\times$  21.20 mm column with hexane/EtOAc as an eluent).

## 2. Materials

$[\text{Rh}(\text{OAc})(\text{cod})]_2$  was prepared from  $\text{RhCl}_3 \cdot \text{H}_2\text{O}$  by following the literature procedure.<sup>1</sup>  $\text{Rh}_2(\text{OAc})_4$  was purchased from Wako Pure Chemical Industries, Ltd.  $[\text{RhCl}(\text{cod})]_2$ ,  $[\text{RhCl}(\text{nbd})]_2$  and  $[\text{RhCl}(\text{PPh}_3)_3]_2$  were purchased from Tokyo Chemical Industry Co., Ltd.,  $\text{AgSbF}_6$  and  $\text{Pd}(\text{OAc})_2$  were purchased from Wako Pure Chemical Industries, Ltd.,  $[\text{Cp}^*\text{RhCl}_2]_2$ ,  $\text{AgOAc}$  and  $[\text{IrCl}(\text{coe})]_2$  were purchased from Sigma-Aldrich accordingly. All the chemicals were used as received without further purification. Substrates **2a-2q**,<sup>2</sup> **2a'**<sup>2</sup> and **1c-D**<sup>3</sup> were prepared following literatures. Toluene and chloroform were purchased from Wako Pure Chemical Industries, Ltd. and Kanto Chemical Co., Inc. as dry solvents and used as received. Solvents for work up, column chromatography and general use (toluene, chloroform, hexane, EtOAc and  $\text{CDCl}_3$ ) were used without further purification.

### 3. Preparation of substrates

#### (*E*)-*N*-benzyl-1-(pyridin-2-yl)methanimine (**2a**)

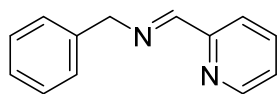

**2a** was prepared following a literature procedure with minor modifications.<sup>2</sup> After placing MS 4A (5.0 g) in a 100 mL round bottom flask, it was activated by heating. Anhydrous chloroform (20 mL, 0.50 M) was then added to the flask under an argon atmosphere with stirring. An equimolar amount of benzylamine (1.1 mL, 10 mmol) and 2-pyridinecarboxaldehyde (0.95 mL, 10 mmol) were added sequentially to the solution which was then stirred at room temperature for 12 hours. After filtering the solution through a pad of celite and quenching the reaction by adding 20 mL of a 1 N aq. NaOH solution. The organic phase was extracted with chloroform and washed repeatedly with brine, and the chloroform phase was then dried over Na<sub>2</sub>SO<sub>4</sub>. After removing the solvent under reduced pressure, 2 mL of toluene was added to the residue which was then evaporated to dryness and stored under a high vacuum for 1 hour to remove chloroform completely to give the corresponding product **2a** as a pale yellow oil (1.62 g, 83% yield), which was used without purification.

<sup>1</sup>H NMR (400 MHz, CDCl<sub>3</sub>) δ 8.65 (ddd, *J* = 4.8, 1.6, 1.0 Hz, 1H), 8.53 – 8.47 (m, 1H), 8.07 (dt, *J* = 7.9, 1.0 Hz, 1H), 7.78 – 7.69 (m, 1H), 7.39 – 7.26 (m, 6H), 4.88 (d, *J* = 1.5 Hz, 2H). <sup>13</sup>C{<sup>1</sup>H} NMR (101 MHz, CDCl<sub>3</sub>) δ 162.98, 154.69, 149.55, 138.83, 136.70, 128.71, 128.32, 127.31, 124.97, 121.50, 65.06. IR (neat, ν/cm<sup>-1</sup>) 3029, 2882, 1647, 1586, 1567, 1468, 1453, 1436, 1362, 1336, 1222, 1147, 1043, 992, 863, 771, 738, 698. HRMS (EI<sup>+</sup>) *m/z*: [M+H]<sup>+</sup> Calcd for C<sub>13</sub>H<sub>13</sub>N<sub>2</sub> 197.1073; found 197.1075.

#### (*E*)-*N*-benzyl-1-phenylmethanimine (**2b**)

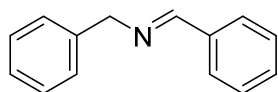

**2b** was prepared by the same procedure as was used for **2a** except that benzaldehyde was used instead of 2-pyridinecarboxaldehyde and the scale of the reaction was 5 mmol instead of 10 mmol to give **2b** as a yellow liquid (799 mg, 82% yield).

$^1\text{H}$  NMR (400 MHz,  $\text{CDCl}_3$ )  $\delta$  8.38 (brs, 1H), 7.83 – 7.73 (m, 2H), 7.46 – 7.21 (m, 8H), 4.82 (d,  $J = 0.9$  Hz, 2H).  $^{13}\text{C}\{^1\text{H}\}$  NMR (101 MHz,  $\text{CDCl}_3$ )  $\delta$  162.11, 139.40, 136.26, 130.88, 128.72, 128.61, 128.39, 128.09, 127.10, 65.16. IR (neat,  $\text{v}/\text{cm}^{-1}$ ) 3061, 3028, 2839, 1642, 1579, 1494, 1451, 1378, 1310, 1220, 1076, 1026, 910, 857, 803, 750, 692. HRMS ( $\text{EI}^+$ )  $m/z$ :  $[\text{M}]^+$  Calcd for  $\text{C}_{14}\text{H}_{13}\text{N}$  195.1048; found 195.1043.

**(*E*)-*N*-benzyl-2,2-dimethylpropan-1-imine (2c)**

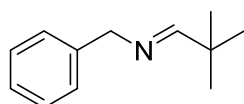

**2c** was prepared by the same procedure as was used for **2a** except that pivalaldehyde was used instead of 2-pyridinecarboxaldehyde and the scale of the reaction was 5 mmol instead of 10 mmol to give **2c** as a pale yellow liquid (693 mg, 79% yield).

$^1\text{H}$  NMR (400 MHz,  $\text{CDCl}_3$ )  $\delta$  7.65 (t,  $J = 1.3$  Hz, 1H), 7.34 – 7.29 (m, 2H), 7.25 – 7.22 (m, 3H), 4.58 (s, 2H), 1.11 (s, 9H).  $^{13}\text{C}\{^1\text{H}\}$  NMR (101 MHz,  $\text{CDCl}_3$ )  $\delta$  173.58, 139.80, 128.47, 127.70, 126.86, 64.68, 36.42, 27.09. IR (neat,  $\text{v}/\text{cm}^{-1}$ ) 3029, 2959, 2867, 2816, 1666, 1496, 1453, 1364, 1206, 1050, 1030, 913, 732, 696. HRMS ( $\text{EI}^+$ )  $m/z$ :  $[\text{M}]^+$  Calcd for  $\text{C}_{12}\text{H}_{17}\text{N}$  175.1361; found 175.1365.

**(*E*)-*N*-benzyl-1-(thiophen-2-yl)methanimine (2d)**

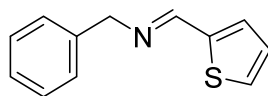

**2d** was prepared by the same procedure as was used for **2a** except that thiophenecarboxaldehyde was used instead of 2-pyridinecarboxaldehyde and the scale of the reaction was 5 mmol instead of 10 mmol to give **2d** as a white sticky solid (921 mg, 92% yield).

$^1\text{H}$  NMR (400 MHz,  $\text{CDCl}_3$ )  $\delta$  8.43 (d,  $J = 1.0$  Hz, 1H), 7.38 (dd,  $J = 5.0, 1.0$  Hz, 1H), 7.37 – 7.28 (m, 5H), 7.28 – 7.22 (m, 1H), 7.07 – 7.04 (m, 1H), 4.78 (s, 2H).  $^{13}\text{C}\{^1\text{H}\}$  NMR (101 MHz,  $\text{CDCl}_3$ )  $\delta$  155.29, 142.54, 139.13, 130.75, 129.15, 128.59, 128.13, 127.46, 127.12, 64.54. IR (neat,  $\text{v}/\text{cm}^{-1}$ ) 3028, 2838, 1631, 1494, 1451, 1431, 1346, 1239, 1217, 1044, 908, 859, 835, 696. HRMS ( $\text{EI}^+$ )  $m/z$ :  $[\text{M}]^+$  Calcd for  $\text{C}_{12}\text{H}_{11}\text{NS}$  201.0612; found 201.0614.

**(E)-N-benzyl-1-(furan-2-yl)methanimine (2e)**

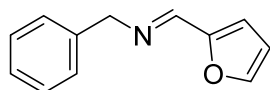

**2e** was prepared by the same procedure as was used for **2a** except that thiophenecarboxaldehyde was used instead of 2-furancarboxaldehyde and the scale of the reaction was 5 mmol instead of 10 mmol to give **2d** as a deep red liquid (858 mg, 93% yield).

$^1\text{H}$  NMR (400 MHz,  $\text{CDCl}_3$ )  $\delta$  8.16 (t,  $J = 1.3$  Hz, 1H), 7.51 (d,  $J = 1.6$  Hz, 1H), 7.37 – 7.22 (m, 5H), 6.78 (d,  $J = 3.4$  Hz, 1H), 6.48 – 6.47 (m, 1H), 4.79 (d,  $J = 1.2$  Hz, 2H).  $^{13}\text{C}\{^1\text{H}\}$  NMR (101 MHz,  $\text{CDCl}_3$ )  $\delta$  151.70, 150.52, 144.94, 138.88, 128.65, 128.36, 127.23, 114.30, 111.75, 65.24. IR (neat,  $\text{v}/\text{cm}^{-1}$ ) 3029, 2877, 1739, 1644, 1483, 1452, 1360, 1273, 1153, 1080, 1014, 928, 884, 822, 735, 697. HRMS ( $\text{EI}^+$ )  $m/z$ :  $[\text{M}]^+$  Calcd for  $\text{C}_{12}\text{H}_{11}\text{NO}$  185.0841; found 185.0842.

**(E)-N-(2-methylbenzyl)-1-(pyridin-2-yl)methanimine (2f)**

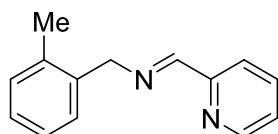

**2f** was prepared by the same procedure as was used for **2a** except that 2-methylbenzylamine was used instead of benzylamine and the scale of the reaction was 5 mmol instead of 10 mmol to give **2f** as an orange liquid (1.01 g, 96% yield).

$^1\text{H}$  NMR (400 MHz,  $\text{CDCl}_3$ )  $\delta$  8.64 (ddd,  $J = 4.8, 1.7, 1.0$  Hz, 1H), 8.43 (dd,  $J = 1.5, 1.0$  Hz, 1H), 8.07 (dt,  $J = 7.9, 1.0$  Hz, 1H), 7.74 (td,  $J = 7.9, 1.7$  Hz, 1H), 7.33 – 7.27 (m, 2H), 7.20 – 7.17 (m, 3H), 4.88 (d,  $J = 1.2$  Hz, 2H), 2.39 (s, 3H).  $^{13}\text{C}\{^1\text{H}\}$  NMR (101 MHz,  $\text{CDCl}_3$ )  $\delta$  162.80, 154.80, 149.51, 136.97, 136.69, 136.57, 130.41, 128.95, 127.51, 126.30, 124.92, 121.43, 62.69. IR (neat,  $\text{v}/\text{cm}^{-1}$ ) 3054, 2859, 1647, 1586, 1567, 1466, 1436, 1360, 1329, 1045, 991, 865, 777, 741. HRMS ( $\text{EI}^+$ )  $m/z$ :  $[\text{M}]^+$  Calcd for  $\text{C}_{14}\text{H}_{14}\text{N}_2$  210.1157; found 210.1159.

**(E)-N-(2-methoxybenzyl)-1-(pyridin-2-yl)methanimine (2g)**

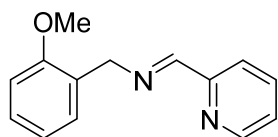

**2g** was prepared by the same procedure as was used for **2a** except that 2-methoxybenzylamine was used instead of benzylamine and the scale of the reaction was 5 mmol instead of 10 mmol to give **2g** as an orange liquid (761 mg, 67% yield).

$^1\text{H}$  NMR (400 MHz,  $\text{CDCl}_3$ )  $\delta$  8.63 (dd,  $J = 4.8, 0.6$  Hz, 1H), 8.45 (dd,  $J = 1.4, 1.0$  Hz, 1H), 8.07 (d,  $J = 7.9$  Hz, 1H), 7.74 – 7.69 (m, 1H), 7.33 – 7.23 (m, 3H), 6.96 – 6.87 (m, 2H), 4.89 (d,  $J = 1.3$  Hz, 2H), 3.83 (s, 3H).  $^{13}\text{C}\{^1\text{H}\}$  NMR (101 MHz,  $\text{CDCl}_3$ )  $\delta$  163.02, 157.41, 154.91, 149.42, 136.58, 129.76, 128.52, 127.02, 124.76, 121.39, 120.69, 110.45, 59.19, 55.45. IR (neat,  $\text{v}/\text{cm}^{-1}$ ) 3006, 2836, 1647, 1587, 1567, 1492, 1465, 1437, 1289, 1277, 1115, 1029, 992, 781. HRMS ( $\text{EI}^+$ )  $m/z$ :  $[\text{M}]^+$  Calcd for  $\text{C}_{14}\text{H}_{14}\text{N}_2\text{O}$  226.1106; found 226.1105.

**(E)-N-(3-methylbenzyl)-1-(pyridin-2-yl)methanimine (2h)**

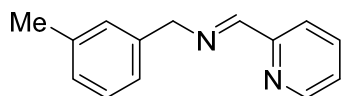

**2h** was prepared by the same procedure as was used for **2a** except that 3-methylbenzylamine was used instead of benzylamine and the scale of the reaction was 5 mmol instead of 10 mmol to give **2h** as a yellow liquid (861 mg, 82% yield).

$^1\text{H}$  NMR (400 MHz,  $\text{CDCl}_3$ )  $\delta$  8.65 (ddd,  $J = 4.9, 1.7, 1.0$  Hz, 1H), 8.48 – 8.45 (m, 1H), 8.07 (dt,  $J = 7.9, 1.1$  Hz, 1H), 7.76 – 7.71 (m, 1H), 7.31 (ddd,  $J = 7.5, 4.9, 1.2$  Hz, 1H), 7.24 – 7.22 (m, 1H), 7.16 – 7.14 (m, 2H), 7.09 – 7.08 (m, 1H), 4.84 (d,  $J = 0.8$  Hz, 2H), 2.35 (s, 3H).  $^{13}\text{C}\{^1\text{H}\}$  NMR (101 MHz,  $\text{CDCl}_3$ )  $\delta$  162.84, 154.68, 149.51, 138.63, 138.33, 136.66, 129.09, 128.60, 128.04, 125.38, 124.92, 121.49, 65.10, 21.53. IR (neat,  $\text{v}/\text{cm}^{-1}$ ) 3012, 2917, 1647, 1587, 1567, 1468, 1435, 1361, 1327, 1222, 1147, 1092, 1043, 991, 773, 744, 698. HRMS ( $\text{EI}^+$ )  $m/z$ :  $[\text{M}+\text{H}]^+$  Calcd for  $\text{C}_{14}\text{H}_{15}\text{N}_2$  211.1230; found 211.1235.

**(E)-N-(3-methoxybenzyl)-1-(pyridin-2-yl)methanimine (2i)**

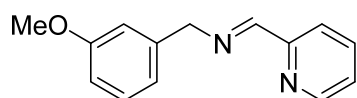

**2i** was prepared by the same procedure as was used for **2a** except that 3-methoxybenzylamine was used instead of benzylamine and the scale of the reaction was 5 mmol instead of 10 mmol to give **2i** as a yellow liquid (1.02 g, 90% yield).

$^1\text{H}$  NMR (400 MHz,  $\text{CDCl}_3$ )  $\delta$  8.64 – 8.63 (m, 1H), 8.48 (brs, 1H), 8.06 (dd,  $J = 7.9, 0.8$  Hz, 1H), 7.73 – 7.70 (m, 1H), 7.31 – 7.24 (m, 2H), 6.94 – 6.91 (m, 2H), 6.81 (dd,  $J = 8.2, 2.6$  Hz, 1H), 4.84 (s, 2H), 3.79 (m, 3H).  $^{13}\text{C}\{^1\text{H}\}$  NMR (101 MHz,  $\text{CDCl}_3$ )  $\delta$  162.95, 159.88, 154.57, 149.45, 140.32, 136.60, 129.62, 124.89, 121.41, 120.54, 113.85, 112.69, 64.86, 55.25. IR (neat,  $\text{v}/\text{cm}^{-1}$ ) 3006, 2835, 1647, 1586, 1489, 1466, 1436, 1326, 1261, 1149, 1043, 992, 865, 781, 695. HRMS ( $\text{EI}^+$ )  $m/z$ :  $[\text{M}]^+$  Calcd for  $\text{C}_{14}\text{H}_{14}\text{N}_2\text{O}$  226.1106; found 226.1108.

#### **(E)-1-(pyridin-2-yl)-N-(3-(trifluoromethyl)benzyl)methanimine (2j)**

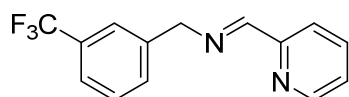

**2j** was prepared by the same procedure as was used for **2a** except that 3-trifluoromethylbenzylamine was used instead of benzylamine and the scale of the reaction was 5 mmol instead of 10 mmol to give **2j** as a yellow liquid (1.23 g, 93% yield).

$^1\text{H}$  NMR (400 MHz,  $\text{CDCl}_3$ )  $\delta$  8.67 – 8.66 (m, 1H), 8.53 (s, 1H), 8.07 (d,  $J = 7.9$  Hz, 1H), 7.78 – 7.74 (m, 1H), 7.64 (s, 1H), 7.56 – 7.53 (m, 2H), 7.48 – 7.44 (m, 1H), 7.35 – 7.32 (m, 1H), 4.92 (s, 2H).  $^{13}\text{C}\{^1\text{H}\}$  NMR (101 MHz,  $\text{CDCl}_3$ )  $\delta$  163.61, 154.36, 149.61, 139.94, 136.76, 131.52, 130.97 (q,  $J = 32.4$  Hz), 129.08, 125.15, 124.91 (q,  $J = 3.6$  Hz), 124.28 (q,  $J = 273.4$  Hz), 124.10 (q,  $J = 3.7$  Hz), 121.56, 64.38.  $^{19}\text{F}$  NMR (376 MHz,  $\text{CDCl}_3$ )  $\delta$  -62.45. IR (neat,  $\text{v}/\text{cm}^{-1}$ ) 3057, 2884, 1649, 1588, 1569, 1437, 1325, 1163, 1120, 1073, 1045, 992, 796, 775, 702. HRMS ( $\text{EI}^+$ )  $m/z$ :  $[\text{M}]^+$  Calcd for  $\text{C}_{14}\text{H}_{11}\text{F}_3\text{N}_2$  264.0874; found 264.0876.

#### **(E)-N-(4-methylbenzyl)-1-(pyridin-2-yl)methanimine (2k)**

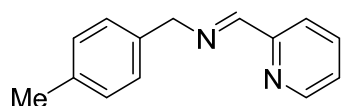

**2k** was prepared by the same procedure as was used for **2a** except that 4-methylbenzylamine was used instead of benzylamine and the scale of the reaction was 5 mmol instead of 10 mmol to give **2k** as a yellow liquid (978 mg, 93% yield).

<sup>1</sup>H NMR (400 MHz, CDCl<sub>3</sub>) δ 8.64 (ddd, *J* = 4.9, 1.7, 1.0 Hz, 1H), 8.47 – 8.46 (m, 1H), 8.06 (dt, *J* = 7.9, 1.0 Hz, 1H), 7.73 (td, *J* = 7.9, 1.7 Hz, 1H), 7.31 (ddd, *J* = 7.5, 4.9, 1.2 Hz, 1H), 7.24 (d, *J* = 7.9 Hz, 2H), 7.16 (d, *J* = 7.9 Hz, 2H), 4.84 (s, 2H), 2.34 (s, 3H). <sup>13</sup>C{<sup>1</sup>H} NMR (101 MHz, CDCl<sub>3</sub>) δ 162.70, 154.71, 149.49, 136.91, 136.64, 135.69, 129.37, 128.29, 124.89, 121.45, 64.81, 21.23. IR (neat, ν/cm<sup>-1</sup>) 3008, 2920, 1647, 1586, 1567, 1514, 1468, 1435, 1361, 1222, 1043, 992, 801, 775. HRMS (EI<sup>+</sup>) *m/z*: [M+H]<sup>+</sup> Calcd for C<sub>14</sub>H<sub>15</sub>N<sub>2</sub> 211.1230; found 211.1237.

**(*E*)-*N*-([1,1'-biphenyl]-4-ylmethyl)-1-(pyridin-2-yl)methanimine (**2l**)**

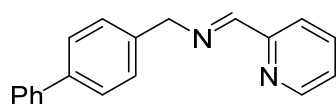

**2l** was prepared by the same procedure as was used for **2a** except that 4-phenylbenzylamine was used instead of benzylamine and the scale of the reaction was 5 mmol instead of 10 mmol to give **2l** as an off-white solid (1.28 g, 94% yield).

<sup>1</sup>H NMR (400 MHz, CDCl<sub>3</sub>) δ 8.64 (ddd, *J* = 4.8, 1.6, 1.0 Hz, 1H), 8.52 (brs, 1H), 8.07 (dt, *J* = 8.0, 1.0 Hz, 1H), 7.73 – 7.69 (m, 1H), 7.58 – 7.56 (m, 5H), 7.43 – 7.39 (m, 3H), 7.34 – 7.27 (m, 2H), 4.90 (brs, 2H). <sup>13</sup>C{<sup>1</sup>H} NMR (101 MHz, CDCl<sub>3</sub>) δ 162.98, 154.57, 149.48, 140.99, 140.20, 137.80, 136.63, 128.92, 128.82, 128.70, 128.49, 127.41, 127.28, 127.15, 124.92, 121.44, 64.67. IR (neat, ν/cm<sup>-1</sup>) 3029, 2880, 1646, 1586, 1566, 1486, 1468, 1435, 1408, 1361, 1043, 1008, 992, 841, 761, 697. HRMS (EI<sup>+</sup>) *m/z*: [M]<sup>+</sup> Calcd for C<sub>19</sub>H<sub>16</sub>N<sub>2</sub> 272.1313; found 272.1315. M.p = 61-63 °C.

**(*E*)-*N*-(4-methoxybenzyl)-1-(pyridin-2-yl)methanimine (**2m**)**

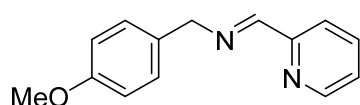



**2m** was prepared by the same procedure as was used for **2a** except that 4-methylbenzylamine was used instead of benzylamine and the scale of the reaction was 5 mmol instead of 10 mmol to give **2m** as a yellow liquid (1.02 g, 90% yield).

$^1\text{H}$  NMR (400 MHz,  $\text{CDCl}_3$ )  $\delta$  8.64 – 8.63 (m, 1H), 8.46 (brs, 1H), 8.04 (d,  $J = 7.9$  Hz, 1H), 7.71 (ddd,  $J = 7.9, 1.6, 0.8$  Hz, 1H), 7.31 – 7.24 (m, 3H), 6.90 – 6.87 (m, 2H), 4.81 (brs, 2H), 3.78 (s, 3H).  $^{13}\text{C}\{^1\text{H}\}$  NMR (101 MHz,  $\text{CDCl}_3$ )  $\delta$  162.50, 158.90, 154.66, 149.45, 136.60, 130.81, 129.50, 124.84, 121.40, 114.08, 64.41, 55.35. IR (neat,  $\text{v}/\text{cm}^{-1}$ ) 3004, 2835, 1646, 1611, 1586, 1567, 1499, 1466, 1301, 1251, 1175, 1035, 992, 818, 777, 752. HRMS ( $\text{EI}^+$ )  $m/z$ :  $[\text{M}]^+$  Calcd for  $\text{C}_{14}\text{H}_{14}\text{N}_2\text{O}$  226.1106; found 226.1101.

**(E)-N-(3,4-dimethylbenzyl)-1-(pyridin-2-yl)methanimine (2n)**

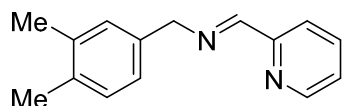

**2n** was prepared by the same procedure as was used for **2a** except that 3,4-dimethylbenzylamine was used instead of benzylamine and the scale of the reaction was 5 mmol instead of 10 mmol to give **2n** as an off-white solid (1.03 g, 92% yield).

$^1\text{H}$  NMR (400 MHz,  $\text{CDCl}_3$ )  $\delta$  8.63 (ddd,  $J = 4.8, 1.6, 1.0$  Hz, 1H), 8.46 (brs, 1H), 8.05 (dt,  $J = 7.8, 1.0$  Hz, 1H), 7.73 – 7.69 (m, 1H), 7.31 – 7.28 (m, 1H), 7.12 – 7.06 (m, 3H), 4.81 (brs, 2H), 2.25 (s, 3H), 2.24 (s, 3H).  $^{13}\text{C}\{^1\text{H}\}$  NMR (101 MHz,  $\text{CDCl}_3$ )  $\delta$  162.56, 154.70, 149.43, 136.83, 136.58, 136.02, 135.53, 129.90, 129.70, 125.80, 124.83, 121.42, 64.86, 19.85, 19.51. IR (neat,  $\text{v}/\text{cm}^{-1}$ ) 3007, 2919, 1647, 1586, 1567, 1503, 1468, 1436, 1359, 1324, 1044, 1024, 992, 881, 818, 777. HRMS ( $\text{EI}^+$ )  $m/z$ :  $[\text{M}]^+$  Calcd for  $\text{C}_{15}\text{H}_{16}\text{N}_2$  224.1313; found 224.1312. M.p = 47-49 °C.

**(E)-N-(3-chloro-4-methoxybenzyl)-1-(pyridin-2-yl)methanimine (2o)**

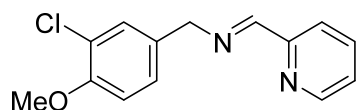

**2o** was prepared by the same procedure as was used for **2a** except that 3-chloro-4-methoxybenzylamine was used instead of benzylamine and the scale of the reaction was 5 mmol instead of 10 mmol to give **2o** as a yellow liquid (1.23 g, 95% yield).

$^1\text{H}$  NMR (400 MHz,  $\text{CDCl}_3$ )  $\delta$  8.64 – 8.63 (m, 1H), 8.45 (brs, 1H), 8.04 – 8.02 (m, 1H), 7.72 – 7.68 (m, 1H), 7.36 – 7.17 (m, 3H), 6.88 – 6.86 (m, 1H), 4.76 (s, 2H), 3.84 (s, 3H).  $^{13}\text{C}\{^1\text{H}\}$  NMR (101 MHz,  $\text{CDCl}_3$ )  $\delta$  162.74, 154.25, 154.01, 149.31, 136.44, 131.82, 129.88, 127.38, 124.80, 122.29, 121.26, 111.99, 63.59, 56.03. IR (neat,  $\text{v}/\text{cm}^{-1}$ ) 3007, 2838, 1647, 1604, 1586, 1567, 1501, 1467, 1437, 1256, 1147, 1064, 1023, 992, 877, 810, 777, 753, 691. HRMS ( $\text{EI}^+$ )  $m/z$ :  $[\text{M}]^+$  Calcd for  $\text{C}_{14}\text{H}_{13}\text{ClN}_2\text{O}$  260.0716; found 260.0713. M.p = 46-48 °C.

**(E)-1-(pyridin-2-yl)-N-(thiophen-2-ylmethyl)methanimine (2p)**

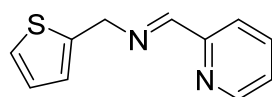

**2p** was prepared by the same procedure as was used for **2a** except that 2-thiopenemethylamine was used instead of benzylamine and the scale of the reaction was 5 mmol instead of 10 mmol to give **2p** as a yellow liquid (961 mg, 95% yield).

$^1\text{H}$  NMR (400 MHz,  $\text{CDCl}_3$ )  $\delta$  8.66 – 8.54 (m, 1H), 8.45 (brs, 1H), 8.07 (dd,  $J = 8.8, 0.9$  Hz, 1H), 7.74 (td,  $J = 7.8, 1.7$  Hz, 1H), 7.32 (ddd,  $J = 7.5, 4.9, 1.2$  Hz, 1H), 7.25 – 7.24 (m, 1H), 7.01 – 6.98 (m, 2H), 5.04 – 5.04 (m, 2H).  $^{13}\text{C}\{^1\text{H}\}$  NMR (101 MHz,  $\text{CDCl}_3$ )  $\delta$  163.35, 163.10, 154.52, 149.67, 149.46, 141.33, 136.71, 127.35, 126.84, 125.81, 125.44, 125.30, 125.21, 125.07, 124.74, 121.61, 59.07. IR (neat,  $\text{v}/\text{cm}^{-1}$ ) 3009, 2882, 1739, 1647, 1586, 1567, 1468, 1435, 1367, 1315, 1227, 1042, 1015, 991, 850, 828, 775, 741. HRMS ( $\text{EI}^+$ )  $m/z$ :  $[\text{M}]^+$  Calcd for  $\text{C}_{11}\text{H}_{10}\text{N}_2\text{S}$  202.0565; found 202.0562.

**(E)-N-(cyclohexylmethyl)-1-(pyridin-2-yl)methanimine (2q)**

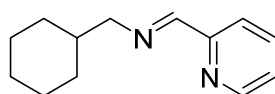

**2q** was prepared by the same procedure as was used for **2a** except that cyclohexanemethylamine was used instead of benzylamine and the scale of the reaction was 5 mmol instead of 10 mmol to give **2q** as a pale yellow liquid (929 mg, 92% yield).

$^1\text{H}$  NMR (400 MHz,  $\text{CDCl}_3$ )  $\delta$  8.64 (ddd,  $J = 4.8, 1.6, 0.8$  Hz, 1H), 8.33 (brs, 1H), 8.00 (d,  $J = 7.8$  Hz, 1H), 7.76 – 7.71 (m, 1H), 7.32 – 7.29 (m, 1H), 3.53 – 3.51 (m, 2H), 1.79 – 1.66 (m, 6H), 1.32 – 1.12 (m, 3H), 1.05 – 0.95 (m, 2H).  $^{13}\text{C}\{^1\text{H}\}$  NMR (101 MHz,  $\text{CDCl}_3$ )  $\delta$  161.90, 154.73, 149.46, 136.61, 124.65, 121.26, 68.56, 38.88, 31.52, 26.63, 26.15. IR (neat,  $\text{v}/\text{cm}^{-1}$ ) 2921, 2850, 1649, 1587, 1567, 1468, 1449, 1437, 1331, 1146, 1028, 991, 770, 742, 666. HRMS ( $\text{EI}^+$ )  $m/z$ :  $[\text{M}+\text{H}]^+$  Calcd for  $\text{C}_{13}\text{H}_{19}\text{N}_2$  203.1543; found 203.1552.

### **(E)-1-phenyl-N-(pyridin-2-ylmethyl)methanimine (2a')**<sup>2</sup>

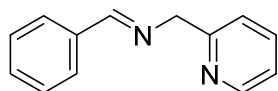

**2a'** was prepared by the same procedure as was used for **2a** except that 2-picolylamine was used instead of benzylamine and benzaldehyde instead of 2-pyridinecarboxaldehyde and the scale of the reaction was 5 mmol instead of 10 mmol to give **2a'** as a yellow liquid (856 mg, 87% yield).

$^1\text{H}$  NMR (400 MHz,  $\text{CDCl}_3$ )  $\delta$  8.57 – 8.55 (m, 1H), 8.46 – 8.45 (m, 1H), 7.82 – 7.79 (m, 2H), 7.64 (td,  $J = 7.7, 1.8$  Hz, 1H), 7.42 – 7.37 (m, 4H), 7.15 – 7.12 (m, 1H), 4.95 (brs, 2H).  $^{13}\text{C}\{^1\text{H}\}$  NMR (101 MHz,  $\text{CDCl}_3$ )  $\delta$  163.06, 159.31, 149.24, 136.62, 136.10, 130.87, 128.60, 128.32, 122.25, 121.98, 66.78. IR (neat,  $\text{v}/\text{cm}^{-1}$ ) 3060, 2827, 1645, 1590, 1571, 1473, 1433, 1310, 1150, 1073, 1048, 1027, 995, 909, 755, 698. HRMS ( $\text{EI}^+$ )  $m/z$ :  $[\text{M}+\text{H}]^+$  Calcd for  $\text{C}_{13}\text{H}_{13}\text{N}_2$  197.1073; found 197.1081.

### **1-benzyl-1H-pyrrole-2,5-dione-3,4-*d*<sub>2</sub> (1c-D)**<sup>3</sup>

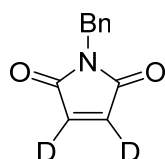

**1c-D** was prepared according to a previously reported procedure.<sup>3</sup> The isolated product had a deuterium content of 76%, as evidenced by <sup>1</sup>H NMR spectroscopy.

<sup>1</sup>H NMR (400 MHz, CDCl<sub>3</sub>) δ 7.35 – 7.26 (m, 4.62H), 6.69 (s, 0.48H), 4.67 (s, 2H).  
<sup>13</sup>C{<sup>1</sup>H} NMR (101 MHz, CDCl<sub>3</sub>) δ 170.52, 136.30, 134.17, 128.80, 128.49, 127.97, 41.50.

#### 4. Optimization of reaction condition with **1a** and **2a** (Table S1)

##### General procedure:

To a sealed tube equipped with a magnetic stirring bar was added the *N*-methylmaleimide (**1a**) (0.20 mmol or 0.40 mmol or 0.60 mmol), catalyst (0 mol% or 0.01 mmol, 5.0 mol%), additive (0 equiv or 0.02 mmol, 10 mol%) and dry toluene (0.50 mL) under an argon atmosphere. To this mixture, a solution of **2a** (0.2 mmol or 0.40 mmol or 0.60 mmol) in dry toluene (1.5 mL) was added and the resulting mixture was stirred at a specified temperature for 8 hours. In all cases, the scale for the reaction was 0.2 mmol. The yield of the corresponding product was determined by <sup>1</sup>H NMR analysis of the crude mixture using 1,3,5-trimethoxybenzene as an internal standard.

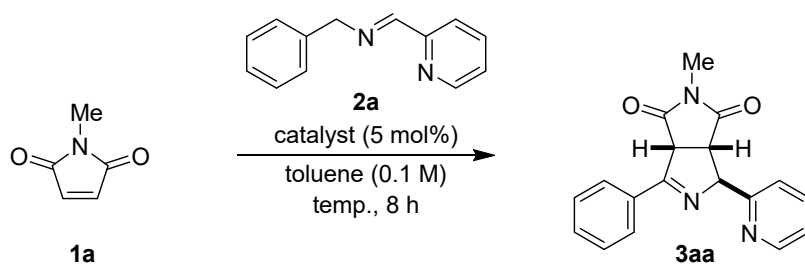

| Entry <sup>a</sup> | 1a/2a | Catalyst                                                | Temp.  | Yield of 3aa (%) <sup>b</sup> |
|--------------------|-------|---------------------------------------------------------|--------|-------------------------------|
| 1                  | 2/1   | none                                                    | 150 °C | n.d.                          |
| 2                  | 2/1   | [Rh(OAc)(cod)] <sub>2</sub>                             | 150 °C | 27                            |
| 3                  | 2/1   | [RhCl(cod)] <sub>2</sub>                                | 150 °C | 10                            |
| 4                  | 2/1   | [RhCl(cod)] <sub>2</sub> , AgOAc (10 mol%)              | 150 °C | 12                            |
| 5                  | 2/1   | [RhCl(cod)] <sub>2</sub> , AgSbF <sub>6</sub> (10 mol%) | 150 °C | n.d.                          |
| 6                  | 2/1   | [RhCl(nbd)] <sub>2</sub>                                | 150 °C | 18                            |
| 7                  | 2/1   | [RhCl(PPh <sub>3</sub> ) <sub>3</sub> ] <sub>2</sub>    | 150 °C | n.d.                          |
| 8                  | 2/1   | [Rh(OAc)] <sub>2</sub>                                  | 150 °C | 9                             |
| 9                  | 2/1   | [Cp*RhCl <sub>2</sub> ] <sub>2</sub>                    | 150 °C | n.d.                          |
| 10                 | 2/1   | Pd(OAc) <sub>2</sub>                                    | 150 °C | n.d.                          |
| 11                 | 2/1   | [IrCl(coe)] <sub>2</sub>                                | 150 °C | n.d.                          |
| 12                 | 2/1   | [Rh(OAc)(cod)] <sub>2</sub>                             | 170 °C | 32                            |
| 13                 | 3/1   | [Rh(OAc)(cod)] <sub>2</sub>                             | 170 °C | 16                            |
| 14                 | 1/1   | [Rh(OAc)(cod)] <sub>2</sub>                             | 170 °C | 41                            |
| 15                 | 1/2   | [Rh(OAc)(cod)] <sub>2</sub>                             | 170 °C | 72 (69) <sup>c</sup>          |
| 16                 | 1/3   | [Rh(OAc)(cod)] <sub>2</sub>                             | 170 °C | 47                            |

<sup>a</sup> Reaction conditions: **1a**, **2a**, catalyst (none or 5 mol%), additive (none or 10 mol%), toluene (2.0 mL) at specified temperature for 8 h. The scale of the reaction was 0.2 mmol in all cases.

<sup>b</sup> Determined by <sup>1</sup>H NMR analysis of the crude mixture. <sup>c</sup> Isolated yield. n.d. = not detected.

### Optimized reaction conditions (Table S1, entry 15):

To a sealed tube equipped with a magnetic stirring bar was added the *N*-methylmaleimide (**1a**) (22.2 mg, 0.20 mmol, 1.0 equiv), [Rh(OAc)(cod)]<sub>2</sub> (5.4 mg, 0.01 mmol, 5 mol%) and dry toluene (0.50 mL) under an argon atmosphere. To this mixture, a solution of **2a** (78.5 mg, 0.40 mmol, 2.0 equiv) in dry toluene (1.5 mL) was added and the resulting mixture was stirred at 170 °C for 8 hours. The yield of the corresponding product was determined by <sup>1</sup>H NMR analysis of the crude mixture using 1,3,5-trimethoxybenzene as internal standard. After the reaction, the reaction mixture was allowed to cool to room temperature,

the solvent was removed under reduced pressure and the residue was purified by flash silica gel column chromatography using *n*-hexane/EtOAc (4/1-1/1) as an eluent to afford the desired product **3aa**.

**2-methyl-6-phenyl-4-(pyridin-2-yl)-4,6a-dihydropyrrolo[3,4-c]pyrrole-1,3(2*H*,3*aH*)-dione (3aa)**

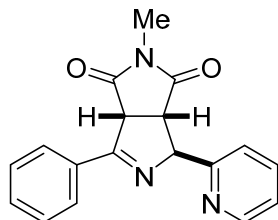

**3aa** was prepared according to the procedure of entry 15, Table S1 (41.7 mg, 69%) to give the corresponding product as an off-white solid.

$^1\text{H}$  NMR (400 MHz,  $\text{CDCl}_3$ )  $\delta$  8.56 (d,  $J = 4.0$  Hz, 1H), 8.22 – 8.19 (m, 2H), 7.70 (td,  $J = 7.6, 1.6$  Hz, 1H), 7.53 – 7.43 (m, 4H), 7.21 (dd,  $J = 6.8, 4.8$  Hz, 1H), 5.78 – 5.76 (m, 1H), 4.86 (dd,  $J = 8.2, 2.4$  Hz, 1H), 4.27 (dd,  $J = 8.2, 2.8$  Hz, 1H), 2.99 (s, 3H).  $^{13}\text{C}\{^1\text{H}\}$  NMR (101 MHz,  $\text{CDCl}_3$ )  $\delta$  177.90, 173.61, 167.07, 159.07, 149.99, 137.06, 131.99, 131.71, 129.77, 128.53, 123.10, 123.01, 79.48, 57.09, 50.17, 25.38. IR (neat,  $\text{v}/\text{cm}^{-1}$ ) 3060, 2929, 1689, 1562, 1492, 1433, 1380, 1279, 1232, 1095, 911, 752, 692. HRMS ( $\text{EI}^+$ )  $m/z$ :  $[\text{M}+\text{H}]^+$  Calcd for  $\text{C}_{18}\text{H}_{16}\text{N}_3\text{O}_2$  306.1237; found 306.1239. M.p = 120-122 °C.

## 5. Evaluation of directing groups (Table 1)

### General procedure:

To a sealed tube equipped with a magnetic stirring bar was added the *N*-methylmaleimide (**1a**) (22.2 mg, 0.20 mmol, 1.0 equiv),  $[\text{Rh}(\text{OAc})(\text{cod})]_2$  (5.4 mg, 0.01 mmol, 5 mol%) and dry toluene (0.50 mL) under an argon atmosphere. To this mixture, a solution of **2a** or **2b** or **2c** or **2d** or **2e** (0.40 mmol, 2.0 equiv) in dry toluene (1.5 mL) was added and the resulting mixture was stirred at 170 °C for 8 hours. The yield of the corresponding product was determined by  $^1\text{H}$  NMR analysis of the crude mixture using 1,3,5-trimethoxybenzene as an internal standard.

## 6. Substrate scope (Table 2)

### General procedure:

To a sealed tube equipped with a magnetic stirring bar was added **1** (0.20 mmol, 1.0 equiv), catalyst  $[\text{Rh}(\text{OAc})(\text{cod})]_2$  (5.4 mg, 0.01 mmol, 5 mol%) and dry toluene (0.50 mL) under an argon atmosphere. To this mixture, a solution of **2** (0.40 mmol, 2.0 equiv) in dry toluene (1.5 mL) was added and the resulting mixture was stirred at 170 °C for 8 hours. After the reaction, the reaction mixture was allowed to cool to room temperature, the solvent was removed under reduced pressure and the residue was purified by flash silica gel column chromatography using *n*-hexane/EtOAc (4/1-1/2) as an eluent to afford the desired products.

### 2-ethyl-6-phenyl-4-(pyridin-2-yl)-4,6a-dihydropyrrolo[3,4-c]pyrrole-1,3(2*H*,3*aH*)-dione (**3ba**)

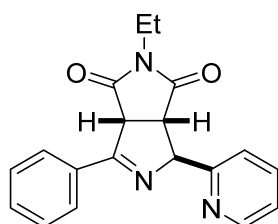

**3ba** was prepared according to the general procedure to give the corresponding product as an off-white solid (45.4 mg, 71%).

$^1\text{H}$  NMR (400 MHz,  $\text{CDCl}_3$ )  $\delta$  8.56 (ddd,  $J = 4.8, 1.6, 0.8$  Hz, 1H), 8.22 – 8.19 (m, 2H), 7.70 (td,  $J = 7.6, 1.6$  Hz, 1H), 7.54 – 7.43 (m, 4H), 7.21 (ddd,  $J = 7.6, 4.8, 1.0$  Hz, 1H), 5.76 – 5.75 (m, 1H), 4.84 (dd,  $J = 8.4, 2.4$  Hz, 1H), 4.26 (dd,  $J = 8.4, 3.0$  Hz, 1H), 3.62 – 3.50 (m, 2H), 1.15 (t,  $J = 7.2$  Hz, 3H).  $^{13}\text{C}\{^1\text{H}\}$  NMR (101 MHz,  $\text{CDCl}_3$ )  $\delta$  177.64, 173.36, 167.18, 159.13, 149.96, 137.06, 132.01, 131.69, 129.77, 128.51, 123.07, 122.98, 79.51, 57.03, 50.13, 34.32, 13.09. IR (neat,  $\text{v}/\text{cm}^{-1}$ ) 3060, 2979, 1773, 1697, 1611, 1589, 1440, 1399, 1378, 1346, 1306, 1224, 1131, 1049, 997, 750, 691. HRMS ( $\text{EI}^+$ )  $m/z$ :  $[\text{M}]^+$  Calcd for  $\text{C}_{19}\text{H}_{17}\text{N}_3\text{O}_2$  319.1321; found 319.1318. M.p = 129-131 °C.

**2-benzyl-6-phenyl-4-(pyridin-2-yl)-4,6a-dihydropyrrolo[3,4-c]pyrrole-1,3(2*H*,3*aH*)-dione (3ca)**

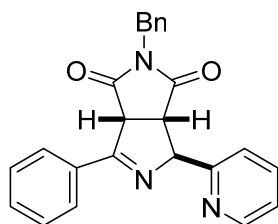

**3ca** was prepared according to the general procedure to give the corresponding product as a yellow sticky solid (48.1 mg, 63%).

$^1\text{H}$  NMR (400 MHz,  $\text{CDCl}_3$ )  $\delta$  8.56 – 8.55 (m, 1H), 8.20 – 8.17 (m, 2H), 7.69 (td,  $J = 7.6$ , 1.8 Hz, 1H), 7.53 – 7.42 (m, 4H), 7.34 – 7.25 (m, 5H), 7.21 (ddd,  $J = 7.6$ , 4.8, 1.0 Hz, 1H), 5.76 – 5.75 (m, 1H), 4.86 (dd,  $J = 8.4$ , 2.4 Hz, 1H), 4.71 – 4.56 (m, 2H), 4.28 (dd,  $J = 8.4$ , 3.2 Hz, 1H).  $^{13}\text{C}\{^1\text{H}\}$  NMR (101 MHz,  $\text{CDCl}_3$ )  $\delta$  177.44, 173.21, 167.14, 159.01, 149.90, 137.14, 135.55, 131.98, 131.72, 129.78, 128.84, 128.82, 128.53, 128.19, 123.11, 123.00, 79.54, 57.08, 50.16, 42.93. IR (neat,  $\text{v}/\text{cm}^{-1}$ ) 3062, 1775, 1702, 1610, 1588, 1494, 1433, 1392, 1342, 1169, 1049, 997, 909, 749, 693. HRMS ( $\text{EI}^+$ )  $m/z$ :  $[\text{M}]^+$  Calcd for  $\text{C}_{24}\text{H}_{19}\text{N}_3\text{O}_2$  381.1477; found 381.1472.

**2-cyclohexyl-6-phenyl-4-(pyridin-2-yl)-4,6a-dihydropyrrolo[3,4-c]pyrrole-1,3(2*H*,3*aH*)-dione (3da)**

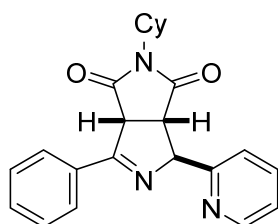

**3da** was prepared according to the general procedure to give the corresponding product as a yellow solid (40.3 mg, 54%).

$^1\text{H}$  NMR (400 MHz,  $\text{CDCl}_3$ )  $\delta$  8.56 – 8.55 (m, 1H), 8.21 – 8.18 (m, 2H), 7.69 (td,  $J = 7.6$ , 1.8 Hz, 1H), 7.52 – 7.42 (m, 4H), 7.20 (ddd,  $J = 7.6$ , 4.8, 1.0 Hz, 1H), 5.74 – 5.73 (m, 1H), 4.77 (dd,  $J = 8.4$ , 2.4 Hz, 1H), 4.18 (dd,  $J = 8.4$ , 3.2 Hz, 1H), 3.94 (tt,  $J = 12.2$ , 3.8 Hz, 1H), 2.18 – 2.01 (m, 2H), 1.81 – 1.77 (m, 2H), 1.64 – 1.53 (m, 3H), 1.33 – 1.12 (m, 3H).  $^{13}\text{C}\{^1\text{H}\}$  NMR (101 MHz,  $\text{CDCl}_3$ )  $\delta$  177.87, 173.63, 167.46, 159.22, 149.94, 137.05, 132.09, 131.64, 129.79, 128.49, 123.05, 122.99, 79.78, 56.69, 52.30, 49.86, 28.98, 28.80, 25.94, 25.90,



25.10. IR (neat,  $\nu/\text{cm}^{-1}$ ) 3060, 2932, 2857, 1772, 1696, 1610, 1589, 1370, 1344, 1258, 1189, 1145, 1049, 996, 910, 730, 691. HRMS (EI<sup>+</sup>)  $m/z$ : [M]<sup>+</sup> Calcd for C<sub>23</sub>H<sub>23</sub>N<sub>3</sub>O<sub>2</sub> 373.1790; found 373.1788. M.p = 133-135 °C.

**2,6-diphenyl-4-(pyridin-2-yl)-4,6a-dihydropyrrolo[3,4-c]pyrrole-1,3(2H,3aH)-dione (3ea)**

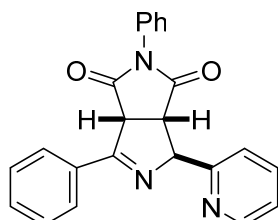

**3ea** was prepared according to the general procedure to give the corresponding product as a yellow solid (30.9 mg, 42%).

<sup>1</sup>H NMR (400 MHz, CDCl<sub>3</sub>)  $\delta$  8.59 – 8.57 (m, 1H), 8.25 – 8.22 (m, 2H), 7.73 (td,  $J$  = 7.8, 1.8 Hz, 1H), 7.58 (d,  $J$  = 7.8 Hz, 1H), 7.51 – 7.35 (m, 6H), 7.29 – 7.22 (m, 3H), 5.92 – 5.91 (m, 1H), 5.03 (dd,  $J$  = 8.4, 2.4 Hz, 1H), 4.47 (dd,  $J$  = 8.4, 3.0 Hz, 1H). <sup>13</sup>C {<sup>1</sup>H} NMR (101 MHz, CDCl<sub>3</sub>)  $\delta$  176.84, 172.47, 167.20, 158.80, 149.89, 137.31, 131.90, 131.81, 131.69, 129.89, 129.25, 128.86, 128.57, 126.57, 123.27, 79.98, 57.12, 50.17. IR (neat,  $\nu/\text{cm}^{-1}$ ) 3064, 1779, 1712, 1590, 1496, 1381, 1306, 1183, 1050, 998, 912, 744, 691. HRMS (EI<sup>+</sup>)  $m/z$ : [M]<sup>+</sup> Calcd for C<sub>23</sub>H<sub>17</sub>N<sub>3</sub>O<sub>2</sub> 367.1321; found 367.1315. M.p = 156-158 °C.

**6-phenyl-4-(pyridin-2-yl)-4,6a-dihydropyrrolo[3,4-c]pyrrole-1,3(2H,3aH)-dione (3fa)**

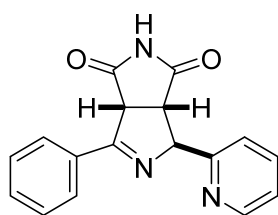

**3fa** was prepared according to the general procedure to give the corresponding product as a yellow solid (23.9 mg, 41%).

<sup>1</sup>H NMR (400 MHz, CDCl<sub>3</sub>)  $\delta$  8.57 – 8.56 (m, 1H), 8.18 – 8.13 (m, 3H), 7.70 (td,  $J$  = 7.6, 1.8 Hz, 1H), 7.53 – 7.43 (m, 4H), 7.23 – 7.20 (m, 1H), 5.82 – 5.81 (m, 1H), 4.88 (dd,  $J$  = 8.4, 2.4 Hz, 1H), 4.30 (dd,  $J$  = 8.4, 3.0 Hz, 1H). <sup>13</sup>C {<sup>1</sup>H} NMR (101 MHz, CDCl<sub>3</sub>)  $\delta$  177.75, 173.25, 166.93, 158.95, 149.95, 137.17, 131.86, 131.77, 129.77, 128.58, 123.18, 122.93, 79.59, 58.18, 51.41. IR (neat,  $\nu/\text{cm}^{-1}$ ) 3061, 2757, 1774, 1713, 1611, 1474, 1437, 1338,

1250, 1180, 1050, 999, 913, 766, 691. HRMS (EI<sup>+</sup>) *m/z*: [M]<sup>+</sup> Calcd for C<sub>17</sub>H<sub>13</sub>N<sub>3</sub>O<sub>2</sub> 291.1008; found 291.1010. M.p = 125-127 °C.

**2-methyl-4-(pyridin-2-yl)-6-(*o*-tolyl)-4,6a-dihydropyrrolo[3,4-*c*]pyrrole-1,3(2*H*,3*aH*)-dione (3af)**

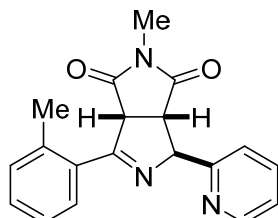

**3af** was prepared according to the general procedure to give the corresponding product as a yellow solid (46.0 mg, 72%).

<sup>1</sup>H NMR (400 MHz, CDCl<sub>3</sub>) δ 8.58 – 8.57 (m, 1H), 7.72 – 7.66 (m, 2H), 7.51 (d, *J* = 7.8 Hz, 1H), 7.35 – 7.19 (m, 4H), 5.87 – 5.85 (m, 1H), 4.86 (dd, *J* = 8.2, 2.4 Hz, 1H), 4.24 (dd, *J* = 8.2, 2.8 Hz, 1H), 2.99 (s, 3H), 2.49 (s, 3H). <sup>13</sup>C{<sup>1</sup>H} NMR (101 MHz, CDCl<sub>3</sub>) δ 178.20, 173.45, 168.82, 158.91, 149.93, 138.27, 137.01, 131.72, 131.58, 130.50, 130.28, 125.70, 123.08, 122.95, 80.08, 59.19, 49.39, 25.30, 22.08. IR (neat, v/cm<sup>-1</sup>) 2956, 1778, 1699, 1589, 1433, 1380, 1281, 1126, 1044, 994, 754. HRMS (EI<sup>+</sup>) *m/z*: [M]<sup>+</sup> Calcd for C<sub>19</sub>H<sub>17</sub>N<sub>3</sub>O<sub>2</sub> 319.1321; found 319.1317. M.p = 96-98 °C.

**6-(2-methoxyphenyl)-2-methyl-4-(pyridin-2-yl)-4,6a-dihydropyrrolo[3,4-*c*]pyrrole-1,3(2*H*,3*aH*)-dione (3ag)**

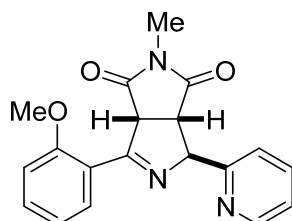

**3ag** was prepared according to the general procedure to give the corresponding product as a yellow sticky solid (36.2 mg, 54%).

<sup>1</sup>H NMR (400 MHz, CDCl<sub>3</sub>) δ 8.61 – 8.60 (m, 1H), 7.72 – 7.66 (m, 2H), 7.50 (d, *J* = 7.8 Hz, 1H), 7.43 (ddd, *J* = 8.4, 7.4, 1.8 Hz, 1H), 7.22 – 7.19 (m, 1H), 7.01 – 6.95 (m, 2H), 5.71 – 5.69 (m, 1H), 5.27 (dd, *J* = 8.4, 2.4 Hz, 1H), 4.20 (dd, *J* = 8.4, 3.0 Hz, 1H), 3.96 (s, 3H), 2.95 (s, 3H). <sup>13</sup>C{<sup>1</sup>H} NMR (101 MHz, CDCl<sub>3</sub>) δ 178.47, 173.62, 168.03, 159.20,

158.78, 149.96, 136.98, 132.64, 130.92, 122.97, 122.89, 121.86, 120.93, 111.84, 79.12, 58.65, 55.92, 49.72, 25.18. IR (neat,  $\nu/\text{cm}^{-1}$ ) 2944, 1695, 1566, 1490, 1466, 1433, 1379, 1278, 1247, 1125, 1090, 1023, 751. HRMS ( $\text{EI}^+$ )  $m/z$ :  $[\text{M}]^+$  Calcd for  $\text{C}_{19}\text{H}_{17}\text{N}_3\text{O}_3$  335.1270; found 335.1264.

**2-methyl-4-(pyridin-2-yl)-6-(m-tolyl)-4,6a-dihydropyrrolo[3,4-c]pyrrole-1,3(2H,3aH)-dione (3ah)**

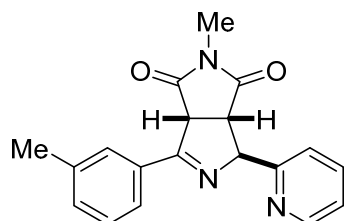

**3ah** was prepared according to the general procedure to give the corresponding product as an off-white solid (46.0 mg, 72%).

$^1\text{H}$  NMR (400 MHz,  $\text{CDCl}_3$ )  $\delta$  8.57 – 8.56 (m, 1H), 8.00 – 7.98 (m, 2H), 7.70 (td,  $J = 7.6$ , 1.4 Hz, 1H), 7.52 (d,  $J = 7.7$  Hz, 1H), 7.38 – 7.29 (m, 2H), 7.23 – 7.20 (m, 1H), 5.77 – 5.75 (m, 1H), 4.86 (dd,  $J = 8.4$ , 2.4 Hz, 1H), 4.24 (dd,  $J = 8.4$ , 3.0 Hz, 1H), 2.99 (s, 3H), 2.40 (s, 3H).  $^{13}\text{C}\{^1\text{H}\}$  NMR (101 MHz,  $\text{CDCl}_3$ )  $\delta$  177.92, 173.60, 167.32, 159.08, 150.00, 138.25, 137.06, 132.55, 131.83, 129.99, 128.39, 127.17, 123.09, 122.96, 79.41, 57.05, 50.20, 25.35, 21.47. IR (neat,  $\nu/\text{cm}^{-1}$ ) 3018, 1688, 1561, 1486, 1432, 1379, 1279, 1228, 1098, 997, 911, 749, 694. HRMS ( $\text{EI}^+$ )  $m/z$ :  $[\text{M}+\text{H}]^+$  Calcd for  $\text{C}_{19}\text{H}_{18}\text{N}_3\text{O}_2$  320.1394; found 320.1396. M.p = 118-120 °C.

**6-(3-methoxyphenyl)-2-methyl-4-(pyridin-2-yl)-4,6a-dihydropyrrolo[3,4-c]pyrrole-1,3(2H,3aH)-dione (3ai)**

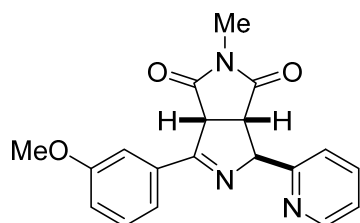

**3ai** was prepared according to the general procedure to give the corresponding product as a yellow sticky solid (44.9 mg, 67%).

$^1\text{H}$  NMR (400 MHz,  $\text{CDCl}_3$ )  $\delta$  8.57 (ddd,  $J = 4.8$ , 1.6, 1.0 Hz, 1H), 7.81 – 7.75 (m, 2H), 7.70 (td,  $J = 7.8$ , 1.6 Hz, 1H), 7.52 (d,  $J = 7.8$  Hz, 1H), 7.39 – 7.35 (m, 1H), 7.23 – 7.20 (m,

1H), 7.06 – 7.03 (m, 1H), 5.78 – 5.77 (m, 1H), 4.83 (dd,  $J = 8.4, 2.4$  Hz, 1H), 4.26 (dd,  $J = 8.4, 3.0$  Hz, 1H), 3.86 (s, 3H), 3.00 (s, 3H).  $^{13}\text{C}\{^1\text{H}\}$  NMR (101 MHz,  $\text{CDCl}_3$ )  $\delta$  177.88, 173.58, 166.99, 159.69, 159.07, 150.01, 137.06, 133.28, 129.52, 123.11, 122.98, 122.59, 118.41, 113.99, 79.40, 57.16, 55.57, 50.24, 25.40. IR (neat,  $\text{v}/\text{cm}^{-1}$ ) 2933, 1178, 1700, 1585, 1433, 1381, 1284, 1173, 1126, 1045, 874, 771, 689. HRMS ( $\text{EI}^+$ )  $m/z$ :  $[\text{M}]^+$  Calcd for  $\text{C}_{19}\text{H}_{17}\text{N}_3\text{O}_3$  335.1270; found 335.1271.

**2-methyl-4-(pyridin-2-yl)-6-(3-(trifluoromethyl)phenyl)-4,6a-dihydropyrrolo[3,4-c]pyrrole-1,3(2H,3aH)-dione (3aj)**

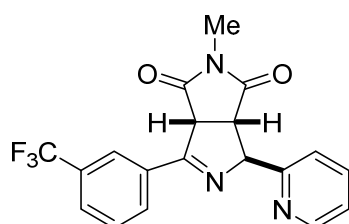

**3aj** was prepared according to the general procedure to give the corresponding product as a yellow solid (53.0 mg, 71%).

$^1\text{H}$  NMR (400 MHz,  $\text{CDCl}_3$ )  $\delta$  8.57 – 8.56 (m, 1H), 8.50 (s, 1H), 8.40 (d,  $J = 7.8$  Hz, 1H), 7.73 (td,  $J = 7.6, 1.6$  Hz, 2H), 7.62 – 7.54 (m, 2H), 7.25 – 7.22 (m, 1H), 5.80 – 5.78 (m, 1H), 4.89 (dd,  $J = 8.4, 2.4$  Hz, 1H), 4.31 (dd,  $J = 8.4, 3.0$  Hz, 1H), 3.01 (s, 3H).  $^{13}\text{C}\{^1\text{H}\}$  NMR (101 MHz,  $\text{CDCl}_3$ )  $\delta$  177.65, 173.39, 165.84, 158.50, 150.07, 137.21, 133.14, 132.67, 131.10 (q,  $J = 32.8$  Hz), 129.06, 128.10 (q,  $J = 3.7$  Hz), 126.54 (q,  $J = 3.5$  Hz), 123.94 (q,  $J = 271.7$  Hz), 123.31, 123.17, 79.60, 57.14, 50.10, 25.44.  $^{19}\text{F}$  NMR (376 MHz,  $\text{CDCl}_3$ )  $\delta$  -62.63. IR (neat,  $\text{v}/\text{cm}^{-1}$ ) 2925, 1776, 1698, 1624, 1571, 1435, 1382, 1324, 1278, 1167, 1125, 1073, 754, 695. HRMS ( $\text{EI}^+$ )  $m/z$ :  $[\text{M}]^+$  Calcd for  $\text{C}_{19}\text{H}_{14}\text{F}_3\text{N}_3\text{O}_2$  373.1038; found 373.1033. M.p = 152-154 °C.

**2-methyl-4-(pyridin-2-yl)-6-(p-tolyl)-4,6a-dihydropyrrolo[3,4-c]pyrrole-1,3(2H,3aH)-dione (3ak)**

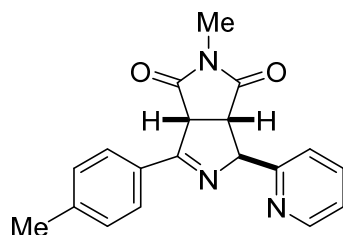

**3ak** was prepared according to the general procedure to give the corresponding product as an off-white solid (47.9 mg, 75%).

$^1\text{H}$  NMR (400 MHz,  $\text{CDCl}_3$ )  $\delta$  8.57 – 8.56 (m, 1H), 8.09 – 8.07 (m, 2H), 7.69 (td,  $J = 7.6, 1.4$  Hz, 1H), 7.51 (d,  $J = 7.6$  Hz, 1H), 7.27 – 7.25 (m, 2H), 7.22 – 7.19 (m, 1H), 5.76 – 5.74 (m, 1H), 4.84 (dd,  $J = 8.4, 2.2$  Hz, 1H), 4.24 (dd,  $J = 8.4, 3.0$  Hz, 1H), 2.99 (s, 3H), 2.39 (s, 3H).  $^{13}\text{C}\{^1\text{H}\}$  NMR (101 MHz,  $\text{CDCl}_3$ )  $\delta$  177.96, 173.69, 166.98, 159.21, 149.96, 142.23, 137.04, 129.72, 129.24, 123.04, 122.92, 79.36, 56.99, 50.19, 25.35, 21.67. IR (neat,  $\text{v}/\text{cm}^{-1}$ ) 3057, 2922, 1775, 1689, 1610, 1561, 1433, 1381, 1278, 1094, 997, 822, 750. HRMS ( $\text{EI}^+$ )  $m/z$ :  $[\text{M}+\text{H}]^+$  Calcd for  $\text{C}_{19}\text{H}_{18}\text{N}_3\text{O}_2$  320.1394; found 320.1397. M.p = 110-112 °C.

**6-([1,1'-biphenyl]-4-yl)-2-methyl-4-(pyridin-2-yl)-4,6a-dihydropyrrolo[3,4-c]pyrrole-1,3(2H,3aH)-dione (3al)**

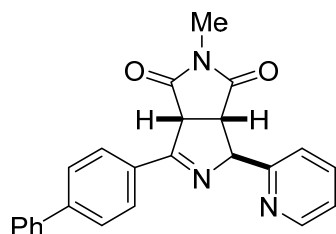

**3al** was prepared according to the general procedure to give the corresponding product as a yellow solid (62.6 mg, 82%).

$^1\text{H}$  NMR (400 MHz,  $\text{CDCl}_3$ )  $\delta$  8.57 (ddd,  $J = 4.8, 1.6, 0.8$  Hz, 1H), 8.29 – 8.26 (m, 2H), 7.73 – 7.67 (m, 3H), 7.64 – 7.61 (m, 2H), 7.55 – 7.53 (m, 1H), 7.48 – 7.43 (m, 2H), 7.40 – 7.35 (m, 1H), 7.23 – 7.20 (m, 1H), 5.80 – 5.79 (m, 1H), 4.89 (dd,  $J = 8.4, 2.4$  Hz, 1H), 4.28 (dd,  $J = 8.4, 3.0$  Hz, 1H), 3.01 (s, 3H).  $^{13}\text{C}\{^1\text{H}\}$  NMR (101 MHz,  $\text{CDCl}_3$ )  $\delta$  177.92, 173.73, 166.75, 159.08, 150.00, 144.40, 140.31, 137.09, 130.83, 130.25, 129.01, 128.06, 127.32, 127.20, 123.12, 123.00, 79.50, 57.09, 50.20, 25.41. IR (neat,  $\text{v}/\text{cm}^{-1}$ ) 3057, 1776, 1701, 1605, 1433, 1379, 1282, 1126, 995, 910, 848, 761, 697. HRMS ( $\text{EI}^+$ )  $m/z$ :  $[\text{M}]^+$  Calcd for  $\text{C}_{24}\text{H}_{19}\text{N}_3\text{O}_2$  381.1477; found 381.1481. M.p = 160-162 °C.

**6-(4-methoxyphenyl)-2-methyl-4-(pyridin-2-yl)-4,6a-dihydropyrrolo[3,4-c]pyrrole-1,3(2H,3aH)-dione (3am)**

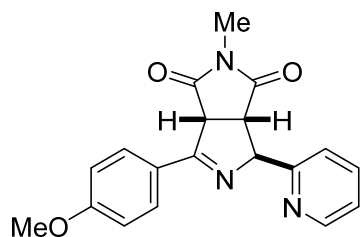

**3am** was prepared according to the general procedure to give the corresponding product as a yellow sticky solid (56.3 mg, 84%).

$^1\text{H}$  NMR (400 MHz,  $\text{CDCl}_3$ )  $\delta$  8.57 (ddd,  $J = 4.8, 1.6, 1.0$  Hz, 1H), 8.18 – 8.15 (m, 2H), 7.70 (td,  $J = 7.8, 1.8$  Hz, 1H), 7.51 (d,  $J = 7.8$  Hz, 1H), 7.23 – 7.19 (m, 1H), 6.98 – 6.94 (m, 2H), 5.74 – 5.73 (m, 1H), 4.82 (dd,  $J = 8.4, 2.4$  Hz, 1H), 4.23 (dd,  $J = 8.4, 3.0$  Hz, 1H), 3.86 (s, 3H), 2.99 (s, 3H).  $^{13}\text{C}\{^1\text{H}\}$  NMR (101 MHz,  $\text{CDCl}_3$ )  $\delta$  177.98, 173.86, 166.33, 162.47, 159.36, 149.99, 137.05, 131.62, 124.69, 123.04, 122.95, 113.89, 79.26, 56.98, 55.54, 50.28, 25.37. IR (neat,  $\text{v}/\text{cm}^{-1}$ ) 2934, 1776, 1701, 1572, 1513, 1434, 1381, 1283, 1252, 1177, 1126, 1030, 840, 752. HRMS ( $\text{EI}^+$ )  $m/z$ :  $[\text{M}]^+$  Calcd for  $\text{C}_{19}\text{H}_{17}\text{N}_3\text{O}_3$  335.1270; found 335.1265.

**6-([1,1'-biphenyl]-4-yl)-2-benzyl-4-(pyridin-2-yl)-4,6a-dihydropyrrolo[3,4-c]pyrrole-1,3(2H,3aH)-dione (3cl)**

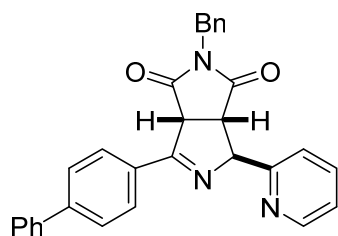

**3cl** was prepared according to the general procedure to give the corresponding product as a yellow solid (65.9 mg, 72%).

$^1\text{H}$  NMR (400 MHz,  $\text{CDCl}_3$ )  $\delta$  8.57 – 8.56 (m, 1H), 8.27 – 8.25 (m, 2H), 7.73 – 7.67 (m, 3H), 7.64 – 7.61 (m, 2H), 7.55 – 7.53 (m, 1H), 7.48 – 7.44 (m, 2H), 7.40 – 7.26 (m, 6H), 7.23 – 7.20 (m, 1H), 5.78 – 5.77 (m, 1H), 4.89 (dd,  $J = 8.4, 2.4$  Hz, 1H), 4.73 – 4.58 (m, 2H), 4.29 (dd,  $J = 8.4, 3.2$  Hz, 1H).  $^{13}\text{C}\{^1\text{H}\}$  NMR (101 MHz,  $\text{CDCl}_3$ )  $\delta$  177.49, 173.36, 166.81, 159.04, 149.97, 144.43, 140.32, 137.16, 135.52, 130.81, 130.28, 129.03, 128.88, 128.23, 128.08, 127.34, 127.22, 123.15, 123.01, 79.57, 57.08, 50.21, 42.98. IR (neat,  $\text{v}/\text{cm}^{-1}$ ) 3031, 1698, 1568, 1487, 1432, 1394, 1340, 1172, 1131, 1083, 909, 846, 751, 698. HRMS ( $\text{EI}^+$ )  $m/z$ :  $[\text{M}]^+$  Calcd for  $\text{C}_{30}\text{H}_{23}\text{N}_3\text{O}_2$  457.1790; found 457.1785. M.p = 137-139 °C.

**6-(3,4-dimethylphenyl)-2-methyl-4-(pyridin-2-yl)-4,6a-dihydropyrrolo[3,4-c]pyrrole-1,3(2*H*,3*aH*)-dione (3an)**

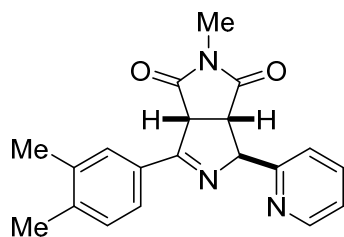

**3an** was prepared according to the general procedure to give the corresponding product as an orange solid (55.3 mg, 83%).

$^1\text{H}$  NMR (400 MHz,  $\text{CDCl}_3$ )  $\delta$  8.56 (ddd,  $J = 4.8, 1.6, 1.0$  Hz, 1H), 7.95 – 7.90 (m, 2H), 7.69 (td,  $J = 7.6, 1.8$  Hz, 1H), 7.51 – 7.49 (m, 1H), 7.23 – 7.18 (m, 2H), 5.75 – 5.74 (m, 1H), 4.84 (dd,  $J = 8.4, 2.4$  Hz, 1H), 4.21 (dd,  $J = 8.4, 3.0$  Hz, 1H), 2.98 (s, 3H), 2.31 (s, 3H), 2.30 (s, 3H).  $^{13}\text{C}\{^1\text{H}\}$  NMR (101 MHz,  $\text{CDCl}_3$ )  $\delta$  177.97, 173.70, 167.24, 159.27, 149.98, 141.01, 137.02, 136.88, 130.44, 129.74, 129.56, 127.62, 123.03, 122.90, 79.35, 56.97, 50.23, 25.32, 20.01, 19.84. IR (neat,  $\text{v}/\text{cm}^{-1}$ ) 2945, 1776, 1701, 1605, 1433, 1380, 1280, 1126, 995, 911, 827, 733, 677. HRMS ( $\text{EI}^+$ )  $m/z$ :  $[\text{M}]^+$  Calcd for  $\text{C}_{20}\text{H}_{19}\text{N}_3\text{O}_2$  333.1477; found 333.1474. M.p = 130-132 °C.

**6-(3-chloro-4-methoxyphenyl)-2-methyl-4-(pyridin-2-yl)-4,6a-dihydropyrrolo[3,4-c]pyrrole-1,3(2*H*,3*aH*)-dione (3ao)**

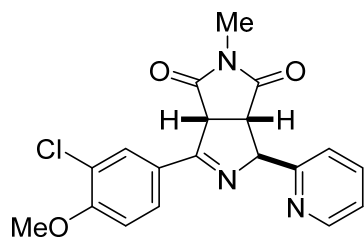

**3ao** was prepared according to the general procedure to give the corresponding product as an orange solid (51.0 mg, 69%).

$^1\text{H}$  NMR (400 MHz,  $\text{CDCl}_3$ )  $\delta$  8.57 – 8.56 (m, 1H), 8.25 (d,  $J = 2.2$  Hz, 1H), 8.11 (dd,  $J = 8.6, 2.2$  Hz, 1H), 7.71 (td,  $J = 7.8, 1.8$  Hz, 1H), 7.53 – 7.51 (m, 1H), 7.24 – 7.20 (m, 1H), 6.99 (d,  $J = 8.6$  Hz, 1H), 5.74 – 5.72 (m, 1H), 4.80 (dd,  $J = 8.4, 2.4$  Hz, 1H), 4.26 (dd,  $J = 8.4, 3.0$  Hz, 1H), 3.95 (s, 3H), 3.00 (s, 3H).  $^{13}\text{C}\{^1\text{H}\}$  NMR (101 MHz,  $\text{CDCl}_3$ )  $\delta$  177.79, 173.66, 165.37, 158.98, 157.69, 149.98, 137.18, 131.33, 130.21, 125.49, 123.18, 123.06, 122.99, 111.33, 79.33, 57.02, 56.42, 50.25, 25.40. IR (neat,  $\text{v}/\text{cm}^{-1}$ ) 3015, 1774, 1696, 1599,

1571, 1501, 1465, 1434, 1381, 1276, 1102, 1064, 1019, 816, 750. HRMS (EI<sup>+</sup>) *m/z*: [M]<sup>+</sup>  
Calcd for C<sub>19</sub>H<sub>16</sub>ClN<sub>3</sub>O<sub>3</sub> 369.0880; found 369.0875. M.p = 139-141 °C.

**2-benzyl-6-(3-chloro-4-methoxyphenyl)-4-(pyridin-2-yl)-4,6a-dihydropyrrolo[3,4-c]pyrrole-1,3(2*H*,3*aH*)-dione (3co)**

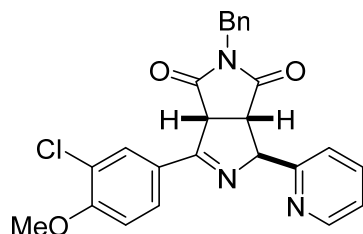

**3co** was prepared according to the general procedure to give the corresponding product as a yellow sticky solid (56.2 mg, 63%).

<sup>1</sup>H NMR (400 MHz, CDCl<sub>3</sub>) δ 8.56 – 8.55 (m, 1H), 8.24 (d, *J* = 2.2 Hz, 1H), 8.09 (dd, *J* = 8.6, 2.2 Hz, 1H), 7.70 (td, *J* = 7.8, 1.8 Hz, 1H), 7.51 (d, *J* = 7.8 Hz, 1H), 7.34 – 7.27 (m, 5H), 7.23 – 7.19 (m, 1H), 6.98 (d, *J* = 8.6 Hz, 1H), 5.72 – 5.71 (m, 1H), 4.79 (dd, *J* = 8.4, 2.4 Hz, 1H), 4.71 – 4.56 (m, 2H), 4.26 (dd, *J* = 8.4, 3.2 Hz, 1H), 3.95 (s, 3H). <sup>13</sup>C{<sup>1</sup>H} NMR (101 MHz, CDCl<sub>3</sub>) δ 177.39, 173.29, 165.34, 158.97, 157.67, 150.01, 137.14, 135.47, 131.31, 130.21, 128.88, 128.83, 128.23, 125.44, 123.16, 122.99, 111.31, 79.43, 56.96, 56.42, 50.24, 42.96. IR (neat, v/cm<sup>-1</sup>) 3032, 1774, 1699, 1600, 1570, 1501, 1465, 1434, 1394, 1338, 1276, 1171, 1064, 1019, 817, 753, 700. HRMS (EI<sup>+</sup>) *m/z*: [M]<sup>+</sup> Calcd for C<sub>25</sub>H<sub>20</sub>ClN<sub>3</sub>O<sub>3</sub> 445.1193; found 445.1194.

**2-methyl-4-(pyridin-2-yl)-6-(thiophen-2-yl)-4,6a-dihydropyrrolo[3,4-c]pyrrole-1,3(2*H*,3*aH*)-dione (3ap)**

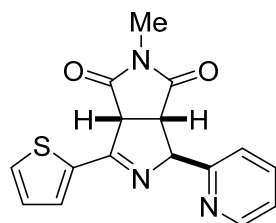

**3ap** was prepared according to the general procedure to give the corresponding product as an orange solid (26.8 mg, 43%).

<sup>1</sup>H NMR (400 MHz, CDCl<sub>3</sub>) δ 8.56 (ddd, *J* = 4.8, 1.8, 0.8 Hz, 1H), 8.08 (dd, *J* = 3.8, 1.0 Hz, 1H), 7.70 (td, *J* = 7.6, 1.8 Hz, 1H), 7.51 – 7.47 (m, 2H), 7.23 – 7.20 (m, 1H), 7.15 (dd, *J* = 5.0, 3.8 Hz, 1H), 5.75 – 5.74 (m, 1H), 4.72 (dd, *J* = 8.4, 2.4 Hz, 1H), 4.26 (dd, *J* = 8.4,



2.8 Hz, 1H), 3.02 (s, 3H).  $^{13}\text{C}\{^1\text{H}\}$  NMR (101 MHz,  $\text{CDCl}_3$ )  $\delta$  177.73, 173.46, 161.45, 158.96, 149.96, 137.09, 136.66, 133.98, 131.05, 128.16, 123.13, 122.99, 79.13, 57.64, 50.56, 25.46. IR (neat,  $\text{v}/\text{cm}^{-1}$ ) 3110, 1700, 1604, 1432, 1284, 1128, 993, 772. HRMS ( $\text{EI}^+$ )  $m/z$ :  $[\text{M}]^+$  Calcd for  $\text{C}_{16}\text{H}_{13}\text{N}_3\text{O}_2\text{S}$  311.0728; found 311.0732. M.p = 134-136 °C.

### 6-cyclohexyl-2-methyl-4-(pyridin-2-yl)-4,6a-dihydropyrrolo[3,4-c]pyrrole-1,3(2*H*,3*aH*)-dione (**3aq**)

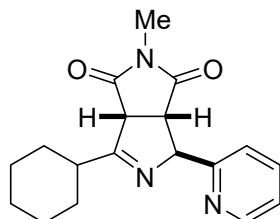

**3aq** was obtained as an orange solid (17.4 mg, 28%).

$^1\text{H}$  NMR (400 MHz,  $\text{CDCl}_3$ )  $\delta$  8.57 – 8.56 (m, 1H), 7.68 (td,  $J = 7.8, 1.8$  Hz, 1H), 7.41 (d,  $J = 7.8$  Hz, 1H), 7.22 – 7.19 (m, 1H), 5.59 (dd,  $J = 4.0, 2.2$  Hz, 1H), 4.33 (dd,  $J = 8.2, 2.2$  Hz, 1H), 3.99 (dd,  $J = 8.2, 2.6$  Hz, 1H), 3.00 (s, 3H), 2.69 – 2.63 (m, 1H), 2.17 – 2.14 (m, 1H), 1.89 – 1.67 (m, 5H), 1.62 – 1.52 (m, 1H), 1.46 – 1.19 (m, 3H).  $^{13}\text{C}\{^1\text{H}\}$  NMR (101 MHz,  $\text{CDCl}_3$ )  $\delta$  178.31, 175.86, 174.18, 159.30, 149.96, 136.91, 122.93, 122.56, 79.32, 57.74, 49.50, 40.01, 31.22, 29.65, 26.22, 26.06, 25.58, 25.24. IR (neat,  $\text{v}/\text{cm}^{-1}$ ) 2930, 2854, 1777, 1700, 1634, 1590, 1434, 1379, 1281, 1125, 984, 909, 753, 733. HRMS ( $\text{EI}^+$ )  $m/z$ :  $[\text{M}]^+$  Calcd for  $\text{C}_{18}\text{H}_{21}\text{N}_3\text{O}_2$  311.1634; found 311.1639. M.p = 114-116 °C.

## 7. One-pot reaction between benzylamines and maleimides (Table 3)

### Procedure for synthesis of **3ba** via one-pot methodology:

To a sealed tube equipped with a magnetic stirring bar was added the *N*-ethylmaleimide (**1b**) (25.0 mg, 0.20 mmol, 1.0 equiv),  $[\text{Rh}(\text{OAc})(\text{cod})]_2$  (5.4 mg, 0.01 mmol, 5 mol%) and dry toluene (2.0 mL) under an argon atmosphere. To this mixture, benzylamine (44  $\mu\text{L}$ , 0.40 mmol, 2.0 equiv), 2-pyridinecarboxaldehyde (38  $\mu\text{L}$ , 0.40 mmol, 2.0 equiv) were added and the resulting mixture was stirred at 170 °C for 8 hours. The yield of the corresponding product **3ba** was determined by  $^1\text{H}$  NMR analysis of the crude mixture using 1,3,5-trimethoxybenzene as an internal standard.

## 8. Mechanistic studies (1) (Scheme S1)

### a) Monitoring the reaction:

To a sealed tube equipped with a magnetic stirring bar were added the *N*-methylmaleimide (**1a**) (22.2 mg, 0.20 mmol, 1.0 equiv), [Rh(OAc)(cod)]<sub>2</sub> (5.4 mg, 0.01 mmol, 5 mol%), internal standard 1,3,5-trimethoxybenzene (11.2 mg, 0.07 mmol, 0.33 equiv) and dry toluene (0.50 mL) under an argon atmosphere. To this mixture, a solution of **2a** (78.5 mg, 0.40 mmol, 2.0 equiv) in dry toluene (1.5 mL) was added and the resulting mixture was stirred at 170 °C for specified hours. The yield of the corresponding product was determined by <sup>1</sup>H NMR analysis of the crude mixture at specified time intervals. Monitoring the progress of the reaction showed that it proceeds sufficiently rapidly to give **3aa** in 62% yield only after 1 hour (Scheme S1a). After 8 hours, the formation of **3aa** reached the saturation point with a yield of 72%.

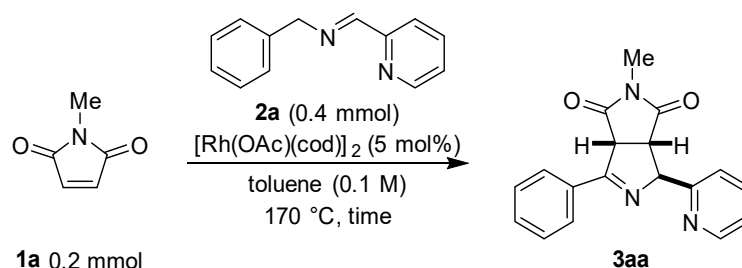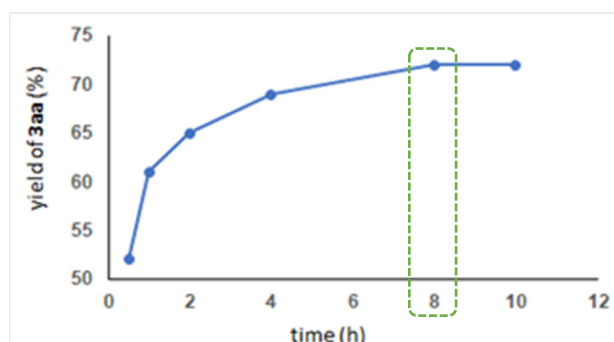

### b) Control experiments between substrates with electron donating and electron withdrawing groups:

To a sealed tube equipped with a magnetic stirring bar were added the *N*-methylmaleimide (**1a**) (22.2 mg, 0.20 mmol, 1.0 equiv), [Rh(OAc)(cod)]<sub>2</sub> (5.4 mg, 0.01 mmol, 5 mol%) and dry toluene (0.50 mL) under an argon atmosphere. To this mixture, a solution of **2i** (90.5 mg, 0.40 mmol, 2.0 equiv) and **2j** (106 mg, 0.40 mmol, 2.0 equiv) in dry toluene (1.5 mL) was added and the resulting mixture was stirred at 170 °C for 8 hours. The yields of the corresponding products were determined by <sup>1</sup>H NMR analysis of the crude mixture using 1,3,5-trimethoxybenzene as internal standard. The reaction produced the corresponding

products in comparable yields, indicating that electronic effects do not appear to have a significant effect on reactivity (Scheme S1b).

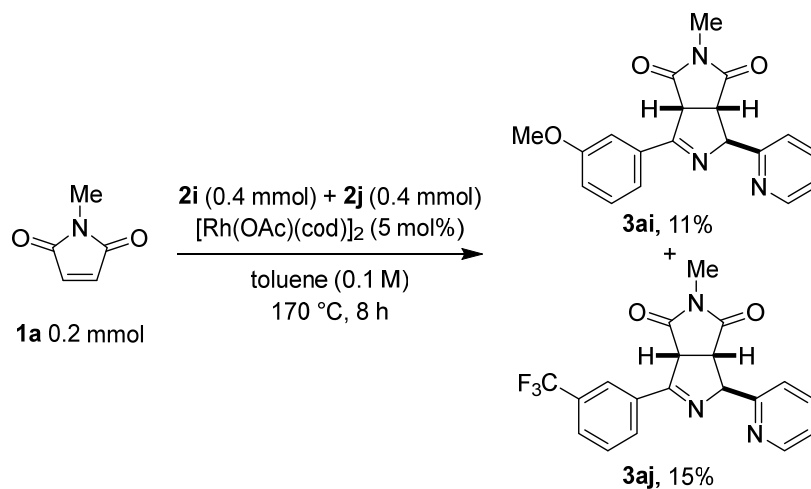

**c) Radical trapping experiment using radical scavengers:**

To a sealed tube equipped with a magnetic stirring bar were added the *N*-methylmaleimide (**1a**) (22.2 mg, 0.20 mmol, 1.0 equiv),  $[\text{Rh}(\text{OAc})(\text{cod})]_2$  (5.4 mg, 0.01 mmol, 5 mol%), a radical scavenger (TEMPO or BHT, 0.20 mmol, 1.0 equiv) and dry toluene (0.50 mL) under an argon atmosphere. To this mixture, a solution of **2a** (78.5 mg, 0.40 mmol, 2.0 equiv) in dry toluene (1.5 mL) was added and the resulting mixture was stirred at 170 °C for 8 hours. The yields of the corresponding products were determined by  $^1\text{H}$  NMR analysis of the crude mixture using 1,3,5-trimethoxybenzene as internal standard. A 37% yield of **3aa** was obtained in the presence of TEMPO (Scheme S1c). The addition of BHT had no effect on the reaction, with **3aa** being formed in 51% yield (Scheme S1c). These results overrule the possibility of the in-situ generation of a radical species during the progress of the reaction.

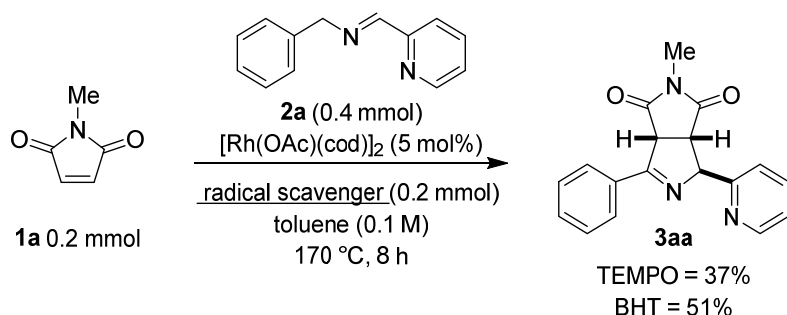

**d) Catalytic reaction with imine derived from benzaldehyde and 2-picolyamine:**

To a sealed tube equipped with a magnetic stirring bar were added the *N*-methylmaleimide (**1a**) (22.2 mg, 0.20 mmol, 1.0 equiv),  $[\text{Rh}(\text{OAc})(\text{cod})]_2$  (5.4 mg, 0.01 mmol, 5 mol%) and

dry toluene (0.50 mL) under an argon atmosphere. To this mixture, a solution of **2a'** (78.5 mg, 0.40 mmol, 2.0 equiv) in dry toluene (1.5 mL) was added and the resulting mixture was stirred at 170 °C for 8 hours. After the reaction, the reaction mixture was allowed cool to room temperature, the solvent was removed under reduced pressure and the residue was purified by flash silica gel column chromatography using *n*-hexane/EtOAc (4/1-1/1) as an eluent to afford the desired product **3aa** in 62% isolated yield (Scheme S1d).

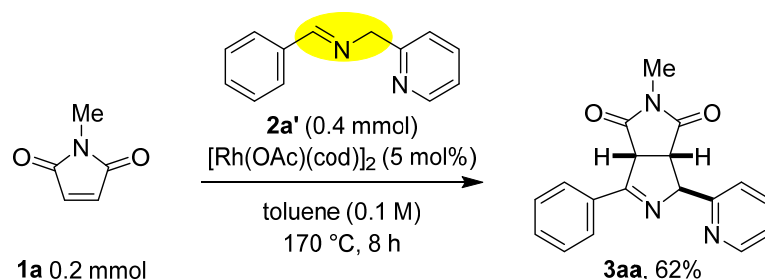

## 9. Mechanistic studies (2) (Scheme S2)

### a) Deuterium labelling experiment of **2a** with deuterated maleimide:

To a sealed tube equipped with a magnetic stirring bar were added the deuterated *N*-benzylmaleimide (**1c-D**) (37.8 mg, 0.20 mmol, 1.0 equiv),  $[\text{Rh}(\text{OAc})(\text{cod})]_2$  (5.4 mg, 0.01 mmol, 5 mol%) and dry toluene (0.50 mL) under an argon atmosphere. To this mixture, a solution of **2a** (78.5 mg, 0.40 mmol, 2.0 equiv) in dry toluene (1.5 mL) was added and the resulting mixture was stirred at 170 °C for 8 hours. After the reaction, the reaction mixture was allowed to cool to room temperature, the solvent was removed under reduced pressure and the residue was purified by flash silica gel column chromatography using *n*-hexane/EtOAc (4/1-2/1) as an eluent to afford the desired product **3c-Da**. The deuterium content of the product was determined by  $^1\text{H}$  NMR and  $^2\text{H}$  NMR analysis of the isolated product.

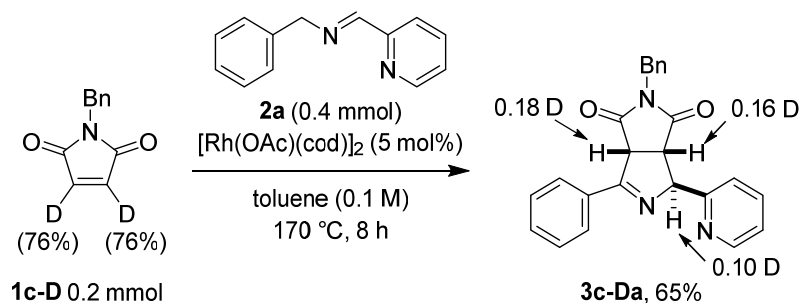

**2-benzyl-6-phenyl-4-(pyridin-2-yl)-4,6a-dihydropyrrolo[3,4-c]pyrrole-1,3(2H,3aH)-dione (3c-Da)**

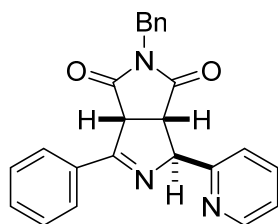

**3c-Da** was obtained as a yellow sticky solid (50.0 mg, 65%).

$^1\text{H}$  NMR (400 MHz,  $\text{CDCl}_3$ )  $\delta$  8.56 – 8.55 (m, 1H), 8.19 – 8.17 (m, 2H), 7.69 (td,  $J = 7.6$ , 1.8 Hz, 1H), 7.53 – 7.42 (m, 4H), 7.34 – 7.26 (m, 5H), 7.22 – 7.19 (m, 1H), 5.76 – 5.75 (m, 0.82H), 4.86 (dd,  $J = 8.4$ , 2.4 Hz, 0.90H), 4.71 – 4.56 (m, 2H), 4.28 (dd,  $J = 8.4$ , 3.2 Hz, 0.84H).

**b) H/D scrambling of maleimide in presence of deuterated acetic acid:**

To a sealed tube equipped with a magnetic stirring bar were added the *N*-methylmaleimide (**1a**) (22.2 mg, 0.20 mmol, 1.0 equiv), catalyst  $[\text{Rh}(\text{OAc})(\text{cod})]_2$  (5.4 mg, 0.01 mmol, 5 mol%) and dry toluene (0.50 mL) under an argon atmosphere. To this mixture, deuterated acetic acid  $\text{AcOH-}d$  (23  $\mu\text{L}$ , 0.40 mmol, 2.0 equiv) was added and the resulting mixture was stirred at 50  $^\circ\text{C}$  for 8 hours. Two other reactions were carried out at two different temperatures, 100  $^\circ\text{C}$  and 170  $^\circ\text{C}$  for 8 hours. The extent of deuterium incorporation in the maleimide for three separate reactions depending on three different temperatures was determined by  $^1\text{H}$  NMR analysis of the crude product.

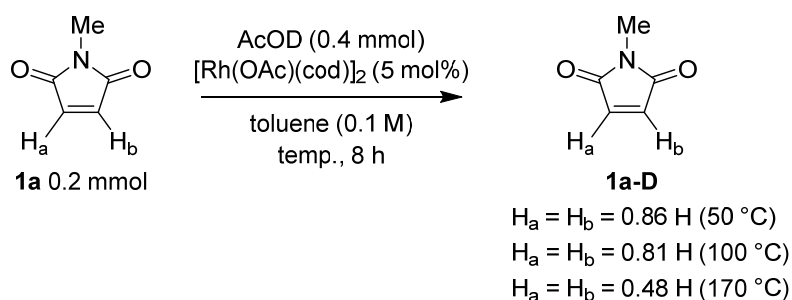

**10. Reduction of pyrroline moiety of 3aa (Scheme S3)**

**General procedure:**

**4** was prepared from **3aa** following a literature procedure with minor modifications.<sup>4</sup> To a reaction vial equipped with a magnetic stirring bar were added the **3aa** (31 mg, 0.10 mmol,

1.0 equiv) and MeOH/AcOH (0.05 M, 3/1). To this mixture, NaBH<sub>3</sub>CN (12 mg, 0.20 mmol, 2.0 equiv) was added in one portion and the reaction mixture was stirred at room temperature for 2 hours. After that the reaction mixture was quenched with 10% NaHCO<sub>3</sub> solution. The organic phase was extracted with EtOAc and washed repeatedly with brine, and then dried over Na<sub>2</sub>SO<sub>4</sub>. The solvent was removed under reduced pressure and the residue was purified by flash silica gel column chromatography using *n*-hexane/EtOAc (1/1-1/2) with 1% Et<sub>3</sub>N as an eluent to afford the desired product **4**.

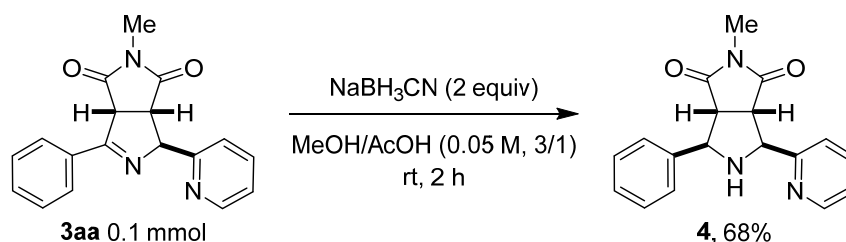

**2-methyl-4-phenyl-6-(pyridin-2-yl)tetrahydropyrrolo[3,4-c]pyrrole-1,3(2*H*,3*aH*)-dione (**4**)<sup>2</sup>**

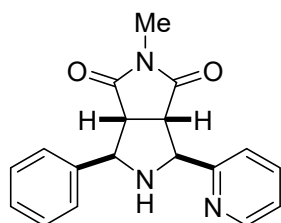

**4** was obtained as an off-white solid (20.9 mg, 68%).

<sup>1</sup>H NMR (400 MHz, CDCl<sub>3</sub>) δ 8.61 – 8.59 (m, 1H), 7.73 (td, *J* = 7.6, 1.8 Hz, 1H), 7.64 – 7.62 (m, 2H), 7.55 – 7.53 (m, 1H), 7.42 – 7.24 (m, 4H), 4.44 (dd, *J* = 7.2, 3.4 Hz, 2H), 3.69 (dd, *J* = 9.6, 7.2 Hz, 1H), 3.55 (dd, *J* = 9.6, 7.6 Hz, 1H), 3.05 (s, 3H). <sup>13</sup>C {<sup>1</sup>H} NMR (101 MHz, CDCl<sub>3</sub>) δ 177.17, 177.06, 158.30, 149.75, 140.10, 137.21, 128.87, 128.05, 127.01, 123.38, 123.15, 66.64, 66.11, 54.94, 54.24, 25.10. IR (neat, ν/cm<sup>-1</sup>) 2924, 2359, 1774, 1699, 1593, 1433, 1381, 1281, 1128, 958, 756, 701. HRMS (EI<sup>+</sup>) *m/z*: [M+H]<sup>+</sup> Calcd for C<sub>18</sub>H<sub>18</sub>N<sub>3</sub>O<sub>2</sub> 308.1394; found 308.1397. M.p = 124-126 °C.

**11. X-ray structural data of 3ap and 3ea**

**Data for 3ap:**

Compound **3ap** was crystallized from a solvent mixture of CHCl<sub>3</sub>/hexane (2/3) and the structural and crystallographic information of this compound are given below.

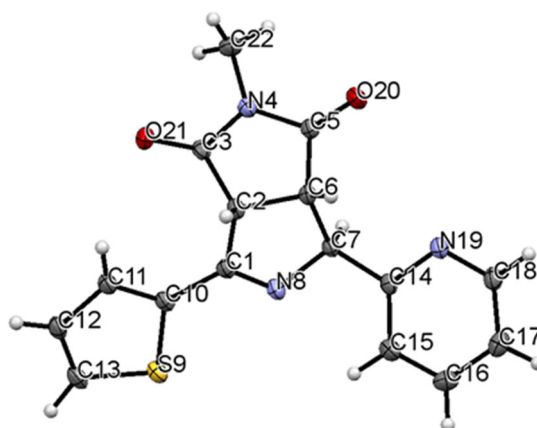

**Figure S1.** The structure of **3ap** was determined by single X-ray diffraction. Hydrogen atoms are not labelled for clarity. The crystallographic structure of **3ap** was presented using Mercury software.

CCDC 2117470 contains supplementary crystallographic data for compound **3ap**. Clear yellow prisms of C<sub>16</sub> H<sub>13</sub> N<sub>3</sub> O<sub>2</sub> S having approximate dimensions of 0.182 × 0.093 × 0.052 mm was mounted in a loop. All measurements were made on a Rigaku XtaLAB P200 diffractometer using multi-layer mirror monochromated Cu-K $\alpha$  radiation. The data were collected at a temperature of 293 K.

The structure was solved by direct methods<sup>5</sup> and expanded using Fourier techniques. The non-hydrogen atoms were refined anisotropically. Hydrogen atoms were refined isotropically. All calculations were performed using the CrystalStructure<sup>6</sup> crystallographic software package except for refinement, which was performed using OLEX2<sup>7</sup> or SHELXL97.<sup>8</sup>

**Table S2. Crystal data and structure refinement for 3ap**

|                     |                                                                 |
|---------------------|-----------------------------------------------------------------|
| Identification code | <b>3ap</b>                                                      |
| Empirical formula   | C <sub>16</sub> H <sub>13</sub> N <sub>3</sub> O <sub>2</sub> S |
| Formula weight      | 311.35                                                          |
| Temperature/K       | 293(2)                                                          |
| Crystal system      | monoclinic                                                      |
| Space group         | P2 <sub>1</sub> /n                                              |
| a/Å                 | 10.7589(2)                                                      |
| b/Å                 | 7.74990(10)                                                     |
| c/Å                 | 16.8477(3)                                                      |

|                                               |                                                               |
|-----------------------------------------------|---------------------------------------------------------------|
| $\alpha/^\circ$                               | 90                                                            |
| $\beta/^\circ$                                | 100.056(2)                                                    |
| $\gamma/^\circ$                               | 90                                                            |
| Volume/ $\text{\AA}^3$                        | 1383.19(4)                                                    |
| Z                                             | 4                                                             |
| $\rho_{\text{calc}}/\text{cm}^3$              | 1.495                                                         |
| $\mu/\text{mm}^{-1}$                          | 2.182                                                         |
| F(000)                                        | 648.0                                                         |
| Crystal size/ $\text{mm}^3$                   | $0.182 \times 0.093 \times 0.052$                             |
| Radiation                                     | CuK $\alpha$ ( $\lambda = 1.54184$ )                          |
| $2\Theta$ range for data collection/ $^\circ$ | 9.086 to 148.564                                              |
| Index ranges                                  | $-13 \leq h \leq 13, -9 \leq k \leq 9, -21 \leq l \leq 19$    |
| Reflections collected                         | 12816                                                         |
| Independent reflections                       | 2804 [ $R_{\text{int}} = 0.0413, R_{\text{sigma}} = 0.0366$ ] |
| Data/restraints/parameters                    | 2804/0/200                                                    |
| Goodness-of-fit on $F^2$                      | 1.057                                                         |
| Final R indexes [ $I \geq 2\sigma(I)$ ]       | $R_1 = 0.0358, wR_2 = 0.0954$                                 |
| Final R indexes [all data]                    | $R_1 = 0.0381, wR_2 = 0.0976$                                 |
| Largest diff. peak/hole / $e \text{\AA}^{-3}$ | 0.27/-0.33                                                    |

**Table S3. Bond Lengths for 3ap**

| Atom | Atom | Length/ $\text{\AA}$ | Atom | Atom | Length/ $\text{\AA}$ |
|------|------|----------------------|------|------|----------------------|
| S9   | C10  | 1.7317(14)           | C7   | C6   | 1.5596(18)           |
| S9   | C13  | 1.7203(14)           | C1   | C2   | 1.5251(18)           |
| O21  | C3   | 1.2109(17)           | C1   | C10  | 1.4559(18)           |
| O20  | C5   | 1.2033(17)           | C3   | C2   | 1.5239(19)           |
| N8   | C7   | 1.4695(17)           | C2   | C6   | 1.5374(17)           |
| N8   | C1   | 1.2806(18)           | C5   | C6   | 1.5198(19)           |
| N4   | C3   | 1.3843(17)           | C15  | C16  | 1.386(2)             |
| N4   | C5   | 1.3933(17)           | C10  | C11  | 1.379(2)             |
| N4   | C22  | 1.4545(18)           | C18  | C17  | 1.381(2)             |



|     |     |            |     |     |            |
|-----|-----|------------|-----|-----|------------|
| N19 | C14 | 1.3402(18) | C12 | C11 | 1.4171(19) |
| N19 | C18 | 1.3465(19) | C12 | C13 | 1.362(2)   |
| C14 | C7  | 1.5195(18) | C17 | C16 | 1.389(2)   |
| C14 | C15 | 1.387(2)   |     |     |            |

**Table S4. Bond Angles for 3ap**

| Atom | Atom | Atom | Angle/°    | Atom | Atom | Atom | Angle/°    |
|------|------|------|------------|------|------|------|------------|
| C13  | S9   | C10  | 91.79(7)   | C3   | C2   | C1   | 115.01(11) |
| C1   | N8   | C7   | 110.42(11) | C3   | C2   | C6   | 104.91(11) |
| C3   | N4   | C5   | 113.62(11) | O20  | C5   | N4   | 124.05(13) |
| C3   | N4   | C22  | 122.24(11) | O20  | C5   | C6   | 127.88(12) |
| C5   | N4   | C22  | 124.06(12) | N4   | C5   | C6   | 108.07(11) |
| C14  | N19  | C18  | 117.15(12) | C2   | C6   | C7   | 104.56(10) |
| N19  | C14  | C7   | 115.02(12) | C5   | C6   | C7   | 112.08(11) |
| N19  | C14  | C15  | 122.77(13) | C5   | C6   | C2   | 105.07(11) |
| C15  | C14  | C7   | 122.14(12) | C16  | C15  | C14  | 119.14(13) |
| N8   | C7   | C14  | 112.06(11) | C1   | C10  | S9   | 120.52(10) |
| N8   | C7   | C6   | 106.91(10) | C11  | C10  | S9   | 110.93(10) |
| C14  | C7   | C6   | 113.84(11) | C11  | C10  | C1   | 128.55(13) |
| N8   | C1   | C2   | 115.48(11) | N19  | C18  | C17  | 124.13(13) |
| N8   | C1   | C10  | 122.41(12) | C13  | C12  | C11  | 113.10(13) |
| C10  | C1   | C2   | 122.08(12) | C10  | C11  | C12  | 112.48(13) |
| O21  | C3   | N4   | 123.53(13) | C18  | C17  | C16  | 117.86(13) |
| O21  | C3   | C2   | 128.25(12) | C15  | C16  | C17  | 118.94(13) |
| N4   | C3   | C2   | 108.22(11) | C12  | C13  | S9   | 111.70(10) |
| C1   | C2   | C6   | 102.53(10) |      |      |      |            |

**Data for 3ea:**

Compound **3ea** was crystallized from a solvent mixture of CHCl<sub>3</sub>/hexane (2/3) and the structural and crystallographic information of this compound are given below.

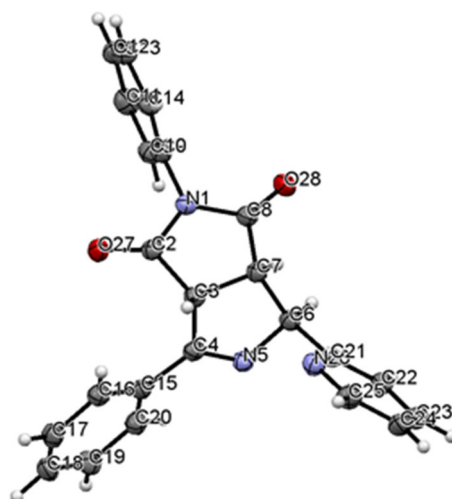

**Figure S2.** The structure of **3ea** was determined by single X-ray diffraction. Hydrogen atoms are not labelled for clarity. The crystallographic structure of **3ea** was presented using Mercury software.

CCDC 2117471 contains supplementary crystallographic data for compound **3ea**. Clear yellow prisms of C<sub>23</sub> H<sub>17</sub> N<sub>3</sub> O<sub>2</sub> having approximate dimensions of 0.179 × 0.121 × 0.045 mm was mounted in a loop. All measurements were made on a Rigaku XtaLAB P200 diffractometer using multi-layer mirror monochromated Cu-K $\alpha$  radiation. The data were collected at a temperature of 123 K.

The structure was solved by direct methods<sup>5</sup> and expanded using Fourier techniques. The non-hydrogen atoms were refined anisotropically. Hydrogen atoms were refined isotropically. All calculations were performed using the CrystalStructure<sup>6</sup> crystallographic software package except for refinement, which was performed using OLEX2<sup>7</sup> or SHELXL97.<sup>8</sup>

**Table S5. Crystal data and structure refinement for 3ea**

|                     |                                                               |
|---------------------|---------------------------------------------------------------|
| Identification code | <b>3ea</b>                                                    |
| Empirical formula   | C <sub>23</sub> H <sub>17</sub> N <sub>3</sub> O <sub>2</sub> |
| Formula weight      | 367.39                                                        |
| Temperature/K       | 123                                                           |
| Crystal system      | monoclinic                                                    |
| Space group         | P2 <sub>1</sub> /n                                            |
| a/Å                 | 14.6645(3)                                                    |

|                                             |                                                   |
|---------------------------------------------|---------------------------------------------------|
| b/Å                                         | 6.15540(10)                                       |
| c/Å                                         | 20.4618(5)                                        |
| $\alpha$ /°                                 | 90                                                |
| $\beta$ /°                                  | 107.871(2)                                        |
| $\gamma$ /°                                 | 90                                                |
| Volume/Å <sup>3</sup>                       | 1757.88(7)                                        |
| Z                                           | 4                                                 |
| $\rho_{\text{calc}}$ /mg/mm <sup>3</sup>    | 1.388                                             |
| $\mu$ /mm <sup>-1</sup>                     | 0.729                                             |
| F(000)                                      | 768.0                                             |
| Crystal size/mm <sup>3</sup>                | 0.179 × 0.121 × 0.045                             |
| 2 $\Theta$ range for data collection        | 6.562 to 148.292°                                 |
| Index ranges                                | -18 ≤ h ≤ 18, -5 ≤ k ≤ 7, -25 ≤ l ≤ 25            |
| Reflections collected                       | 17488                                             |
| Independent reflections                     | 3572[R(int) = 0.0439]                             |
| Data/restraints/parameters                  | 3572/0/253                                        |
| Goodness-of-fit on F <sup>2</sup>           | 1.035                                             |
| Final R indexes [I ≥ 2 $\sigma$ (I)]        | R <sub>1</sub> = 0.0370, wR <sub>2</sub> = 0.0966 |
| Final R indexes [all data]                  | R <sub>1</sub> = 0.0413, wR <sub>2</sub> = 0.1002 |
| Largest diff. peak/hole / e Å <sup>-3</sup> | 0.19/-0.19                                        |

**Table S6. Bond Lengths for 3ea**

| Atom | Atom | Length/Å   | Atom | Atom | Length/Å   |
|------|------|------------|------|------|------------|
| O27  | C2   | 1.2068(15) | C16  | C17  | 1.3917(17) |
| O28  | C8   | 1.2080(15) | C8   | C7   | 1.5150(16) |
| N5   | C4   | 1.2836(15) | C20  | C19  | 1.3861(17) |
| N5   | C6   | 1.4814(15) | C3   | C2   | 1.5228(16) |
| N1   | C9   | 1.4402(15) | C3   | C7   | 1.5322(16) |
| N1   | C8   | 1.3953(15) | C3   | C4   | 1.5310(16) |
| N1   | C2   | 1.3960(15) | C7   | C6   | 1.5440(16) |

| Atom | Atom | Length/Å   | Atom | Atom | Length/Å   |
|------|------|------------|------|------|------------|
| N26  | C21  | 1.3431(16) | C14  | C13  | 1.3887(18) |
| N26  | C25  | 1.3386(17) | C22  | C23  | 1.3920(18) |
| C9   | C14  | 1.3886(17) | C18  | C19  | 1.3887(19) |
| C9   | C10  | 1.3825(17) | C18  | C17  | 1.3871(19) |
| C15  | C16  | 1.3957(17) | C10  | C11  | 1.3902(19) |
| C15  | C20  | 1.4026(17) | C13  | C12  | 1.3872(19) |
| C15  | C4   | 1.4802(16) | C23  | C24  | 1.382(2)   |
| C21  | C6   | 1.5218(16) | C12  | C11  | 1.388(2)   |
| C21  | C22  | 1.3894(17) | C25  | C24  | 1.385(2)   |

**Table S7. Bond Angles for 3ea**

| Atom | Atom | Atom | Angle/°    | Atom | Atom | Atom | Angle/°    |
|------|------|------|------------|------|------|------|------------|
| C4   | N5   | C6   | 109.91(10) | O27  | C2   | C3   | 127.68(11) |
| C8   | N1   | C9   | 123.24(10) | N1   | C2   | C3   | 107.72(9)  |
| C8   | N1   | C2   | 113.28(10) | C8   | C7   | C3   | 104.95(9)  |
| C2   | N1   | C9   | 123.46(10) | C8   | C7   | C6   | 112.97(10) |
| C25  | N26  | C21  | 117.23(11) | C3   | C7   | C6   | 104.92(9)  |
| C14  | C9   | N1   | 119.15(11) | N5   | C4   | C15  | 121.75(11) |
| C10  | C9   | N1   | 119.58(11) | N5   | C4   | C3   | 114.99(10) |
| C10  | C9   | C14  | 121.27(11) | C15  | C4   | C3   | 123.24(10) |
| C16  | C15  | C20  | 119.32(11) | N5   | C6   | C21  | 106.35(9)  |
| C16  | C15  | C4   | 120.99(11) | N5   | C6   | C7   | 106.02(9)  |
| C20  | C15  | C4   | 119.59(10) | C21  | C6   | C7   | 112.55(10) |
| N26  | C21  | C6   | 115.75(10) | C13  | C14  | C9   | 118.83(12) |
| N26  | C21  | C22  | 123.11(11) | C21  | C22  | C23  | 118.57(12) |
| C22  | C21  | C6   | 121.09(11) | C17  | C18  | C19  | 119.54(11) |
| C17  | C16  | C15  | 120.16(11) | C20  | C19  | C18  | 120.78(12) |
| O28  | C8   | N1   | 124.28(11) | C9   | C10  | C11  | 119.41(12) |
| O28  | C8   | C7   | 127.56(11) | C18  | C17  | C16  | 120.36(11) |
| N1   | C8   | C7   | 108.15(10) | C12  | C13  | C14  | 120.51(12) |

| Atom | Atom | Atom | Angle/°    | Atom | Atom | Atom | Angle/°    |
|------|------|------|------------|------|------|------|------------|
| C19  | C20  | C15  | 119.81(11) | C24  | C23  | C22  | 118.79(12) |
| C2   | C3   | C7   | 105.25(9)  | C13  | C12  | C11  | 119.99(12) |
| C2   | C3   | C4   | 110.72(9)  | N26  | C25  | C24  | 123.71(13) |
| C4   | C3   | C7   | 102.00(9)  | C12  | C11  | C10  | 119.98(12) |
| O27  | C2   | N1   | 124.56(11) | C23  | C24  | C25  | 118.57(12) |

## 12. References

- <sup>1</sup> J. Chatt and L. M. Venanzi, *J. Chem. Soc.*, 1957, 4735–4741.
- <sup>2</sup> S. Padilla, R. Tejero, J. Adrio and J. C. Carretero, *Org. Lett.*, 2010, **12**, 5608–5611.
- <sup>3</sup> N. Ohara, S. Rej and N. Chatani, *Chem. Lett.*, 2020, **49**, 1053–1057.
- <sup>4</sup> G. Sathishkannan and K. Srinivasan, *Org. Lett.*, 2011, **13**, 6002–6005.
- <sup>5</sup> A. Altomare, G. Cascarano, C. Giacovazzo and A. Guagliardi, *J. Appl. Cryst.*, 1993, **26**, 343–350.
- <sup>6</sup> Crystal Structure Analysis Package, Rigaku Corporation (2000-2017). Tokyo 196-8666, Japan.
- <sup>7</sup> O. V. Dolomanov, L. J. Bourhis, R. J. Gildea, J. A. K. Howard and H. Puschmann, *J. Appl. Cryst.*, 2009, **42**, 339–341.
- <sup>8</sup> G. M. Sheldrick, *Acta Cryst.* 2008, **A64**, 112–122.

### 13. <sup>1</sup>H and <sup>13</sup>C NMR spectra of new compounds

#### NMR spectra of starting materials

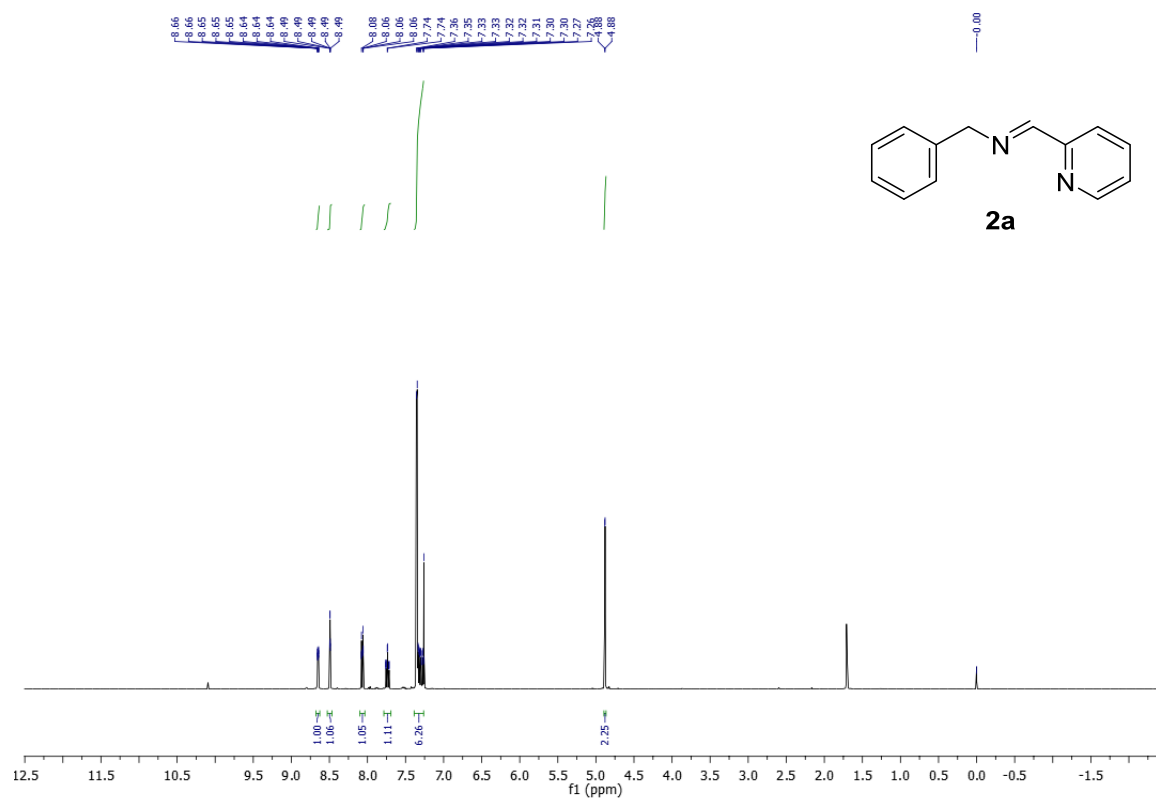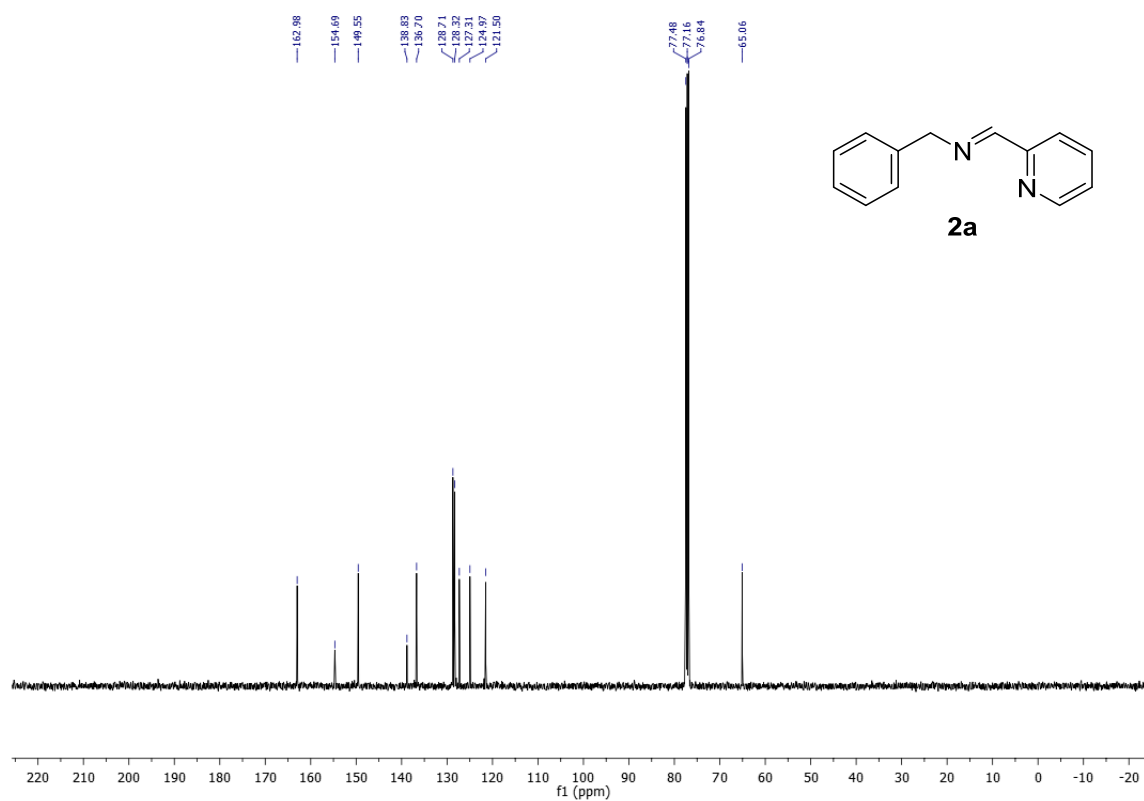

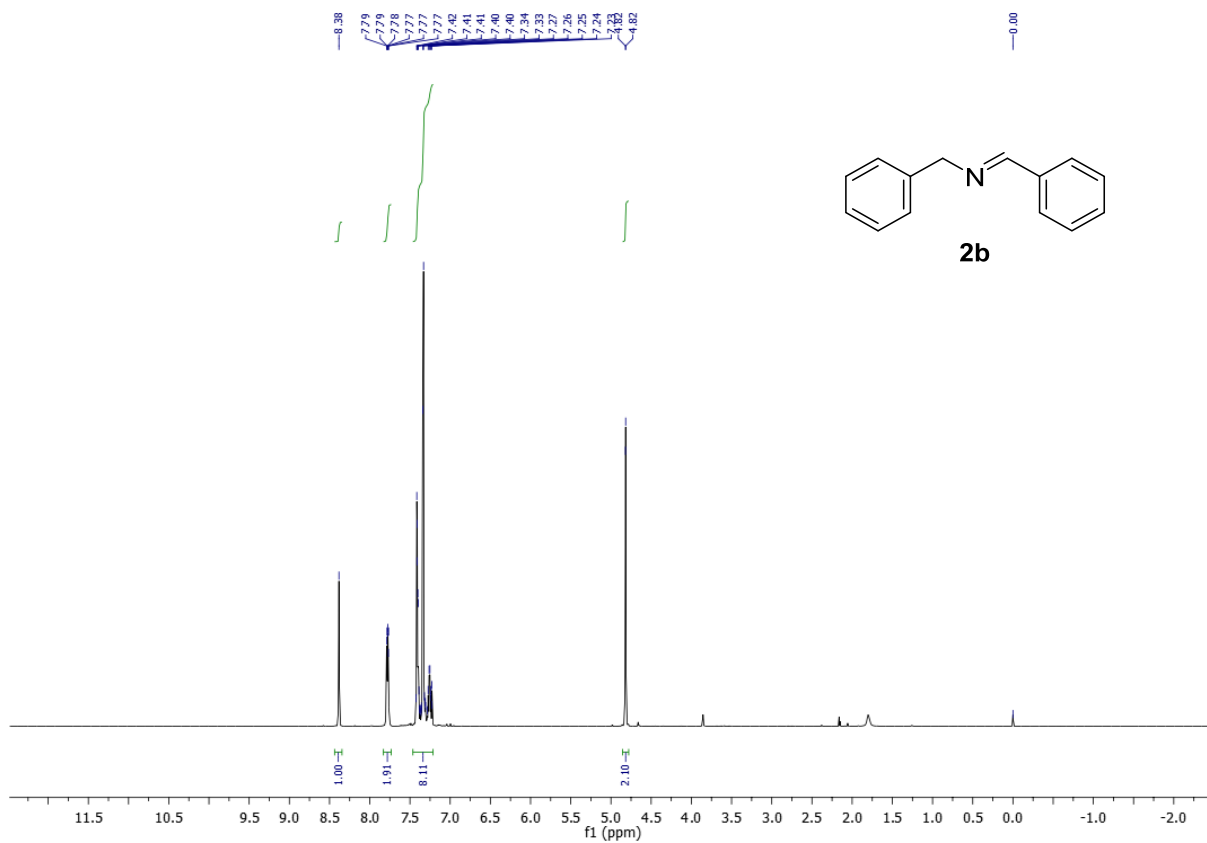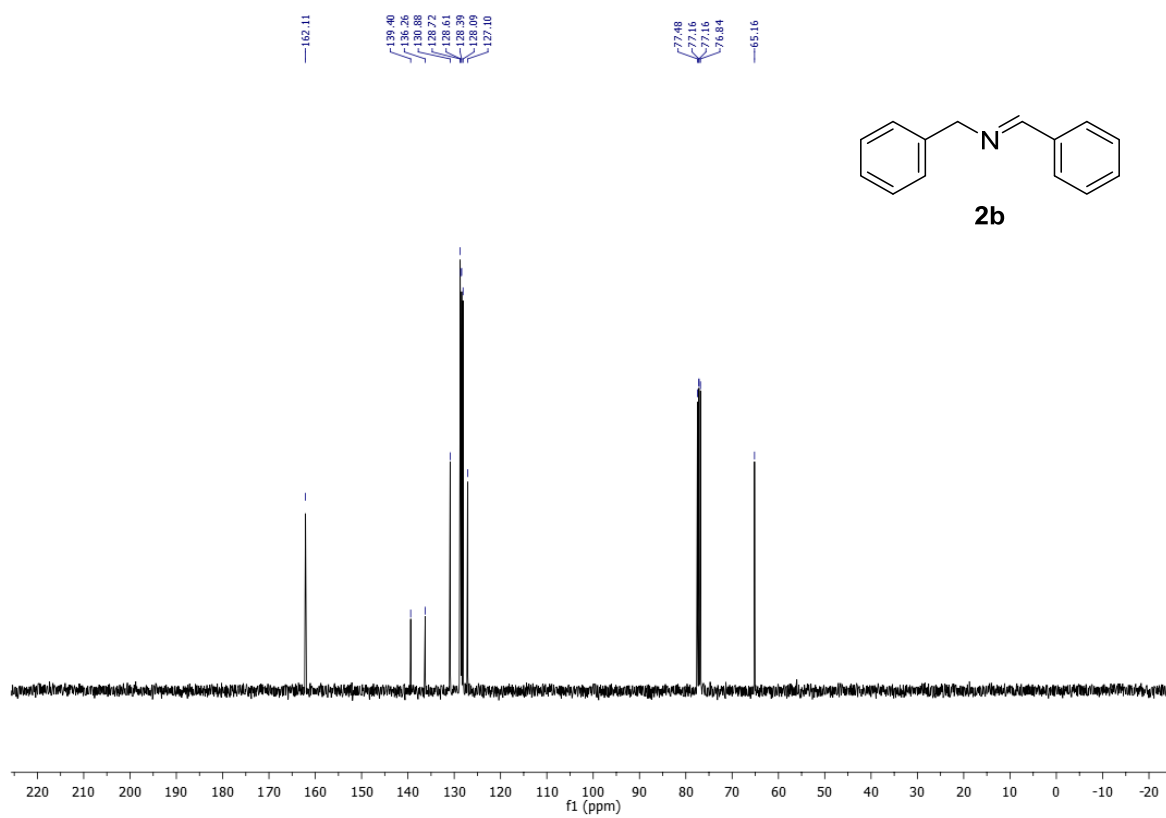

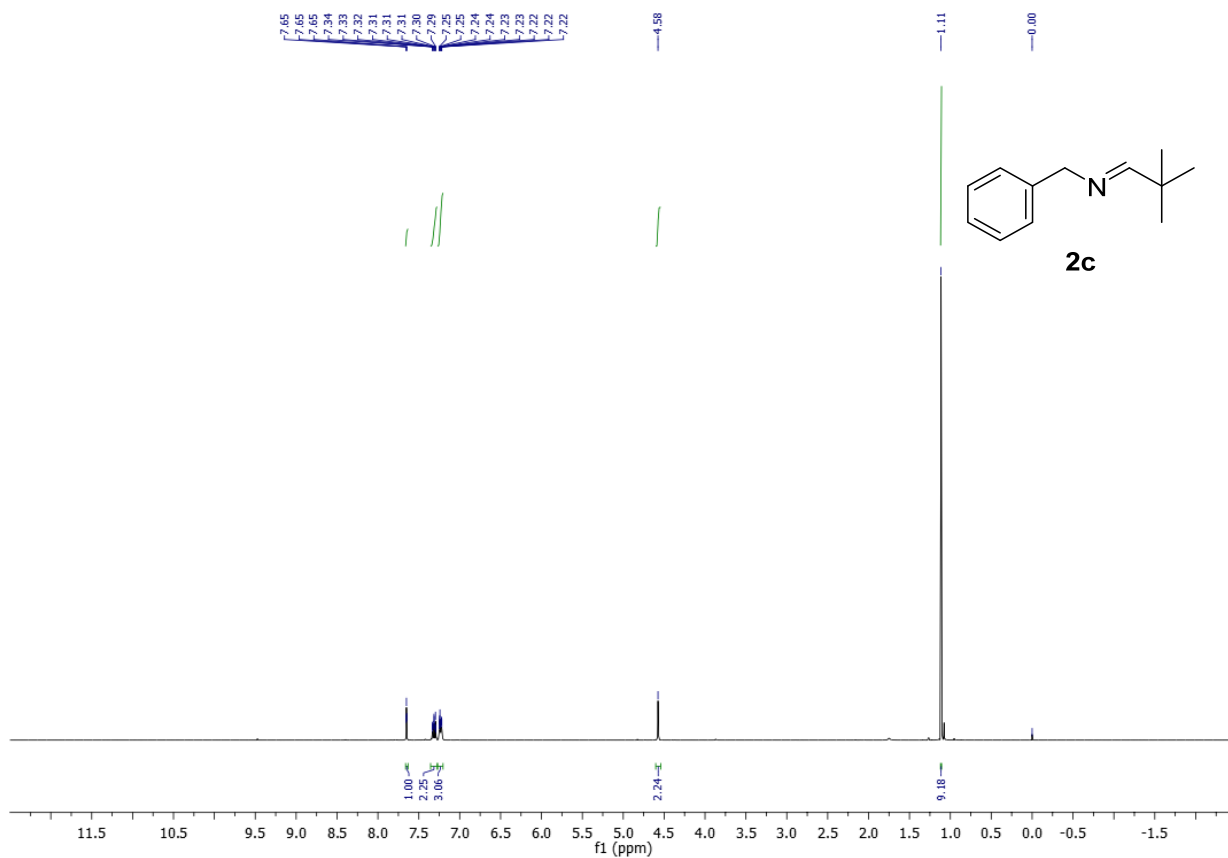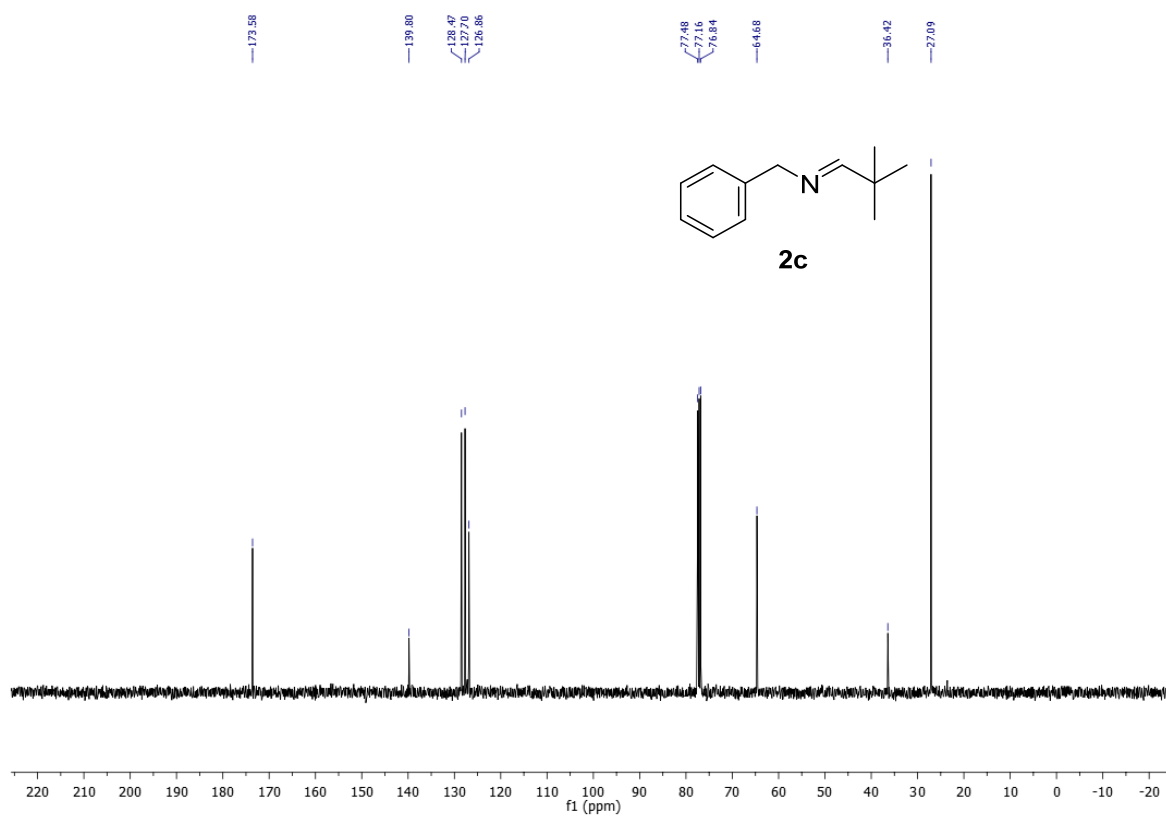



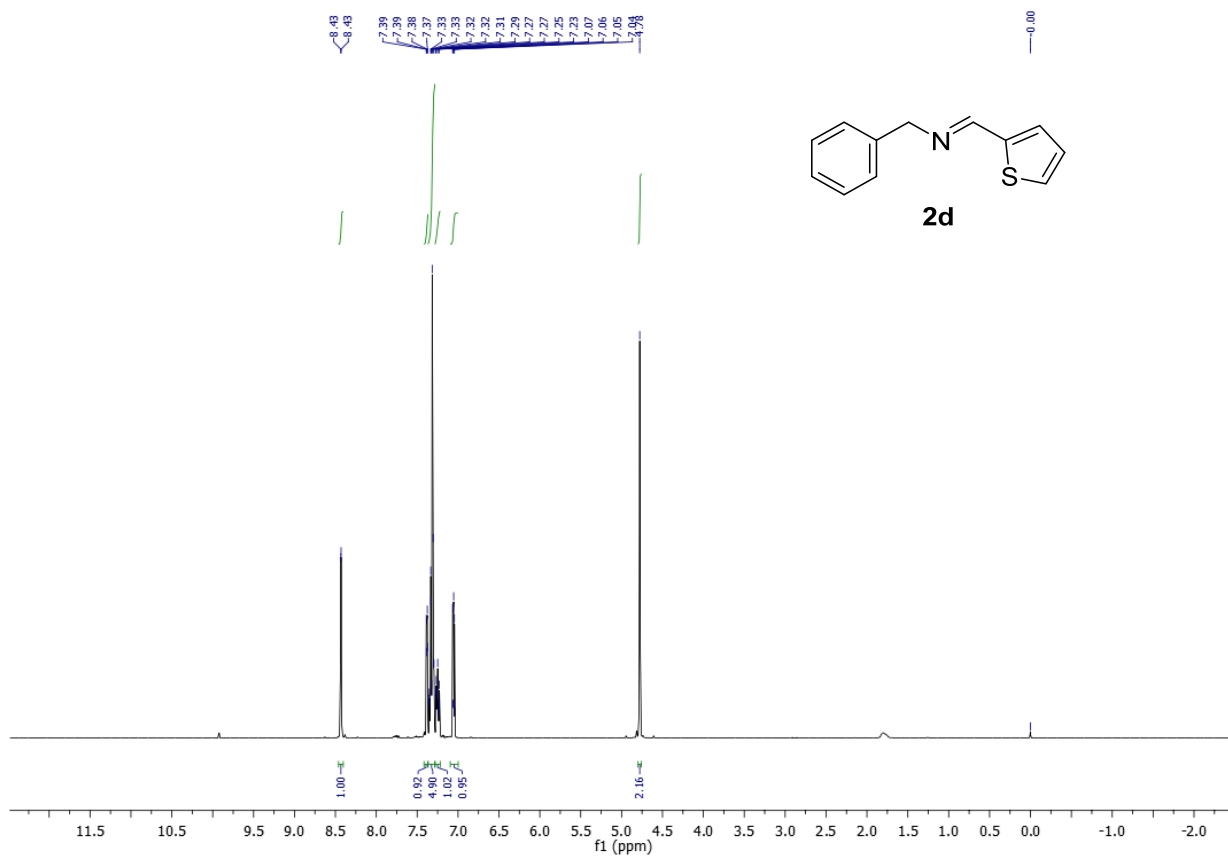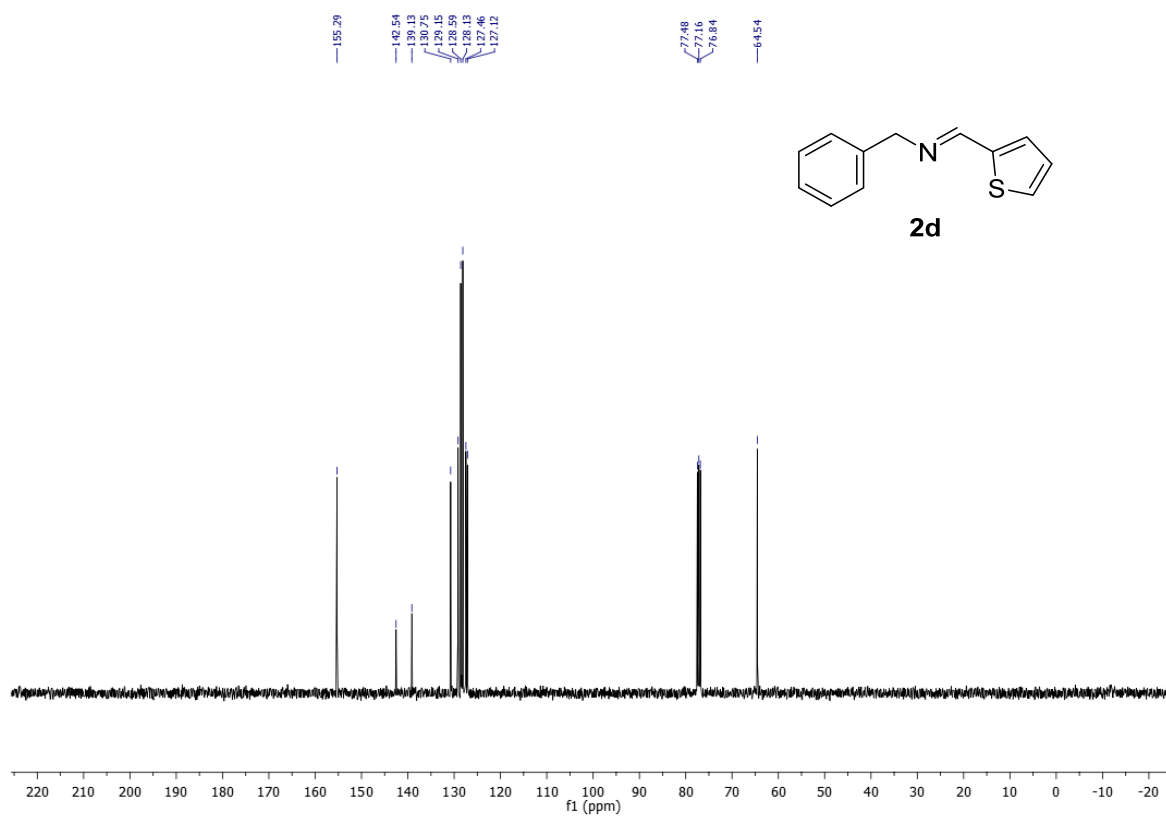



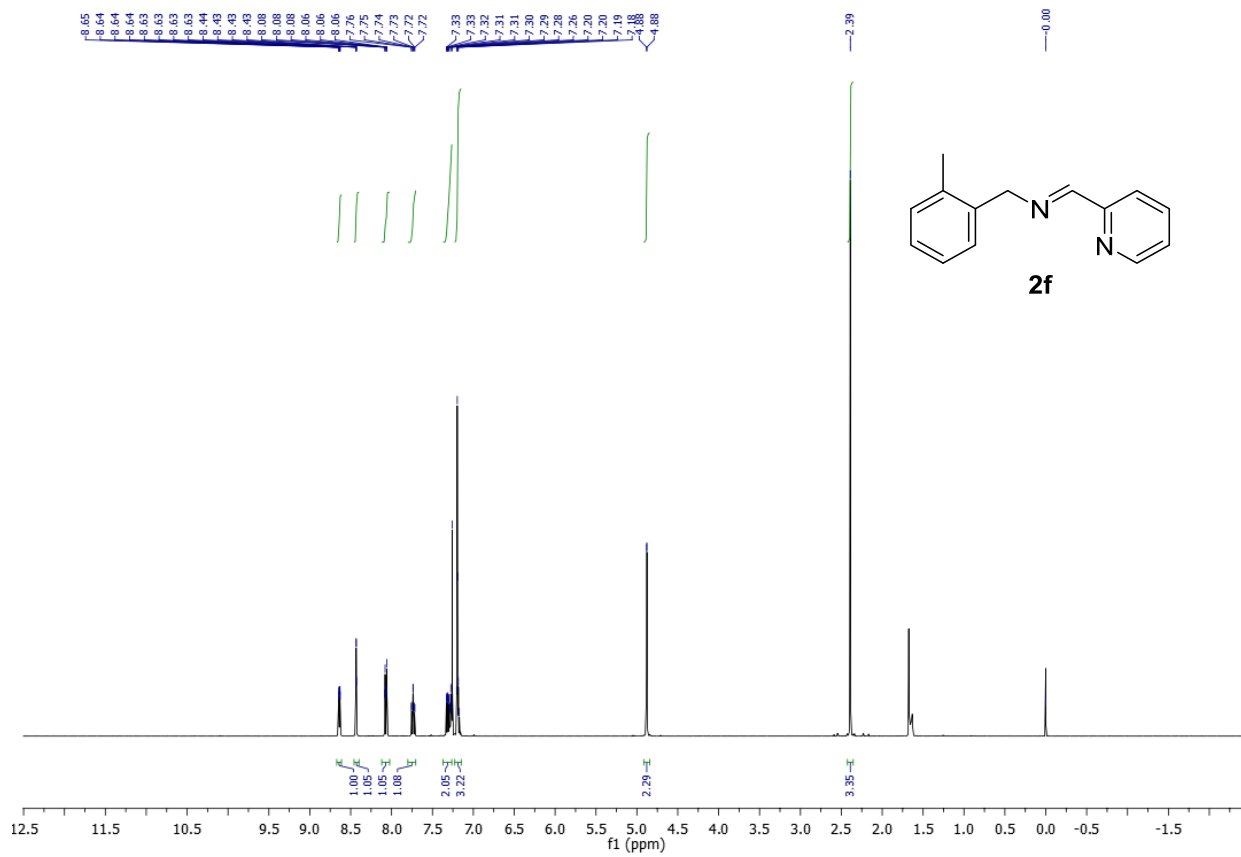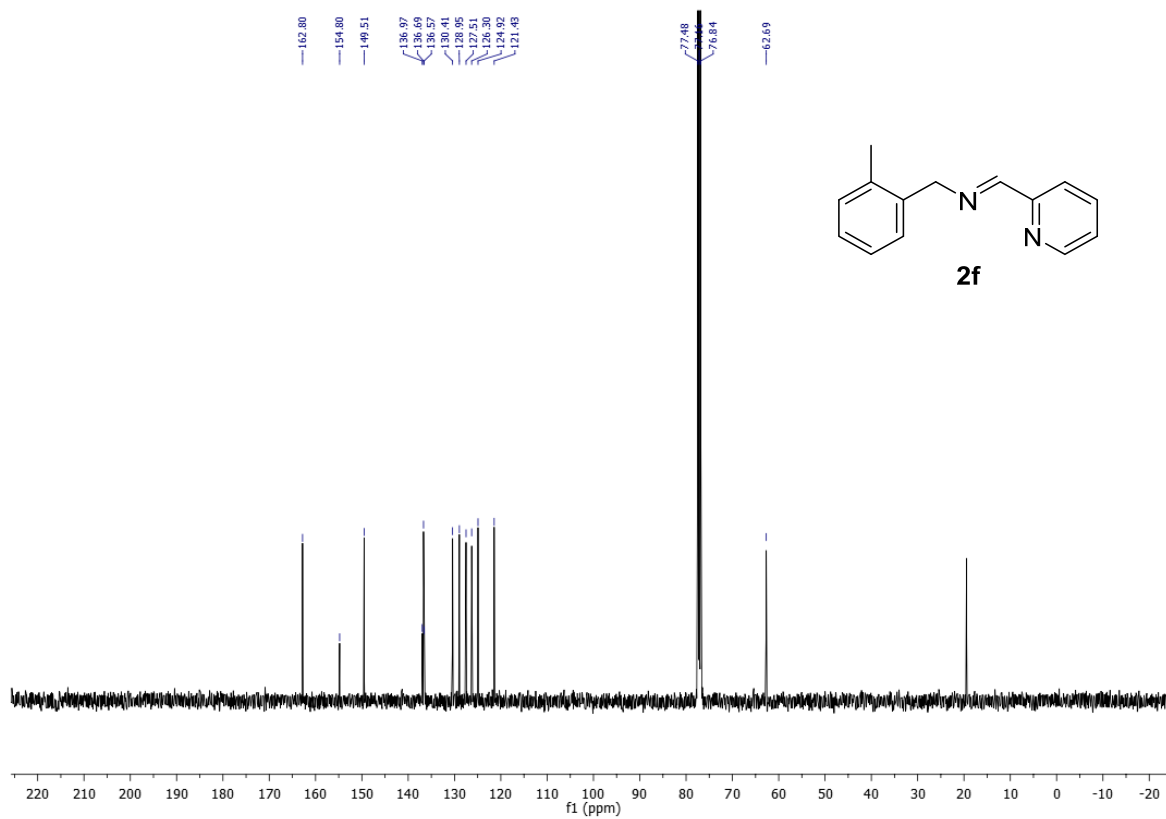

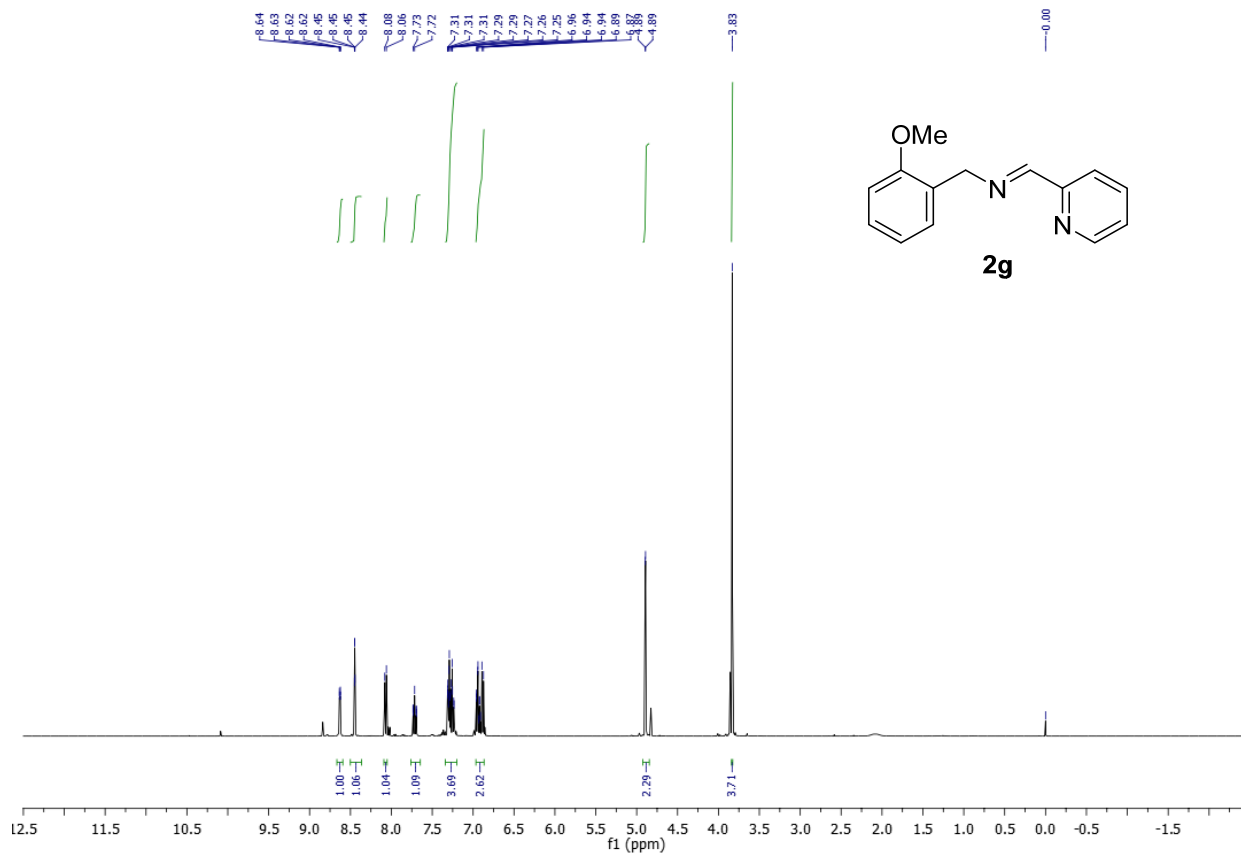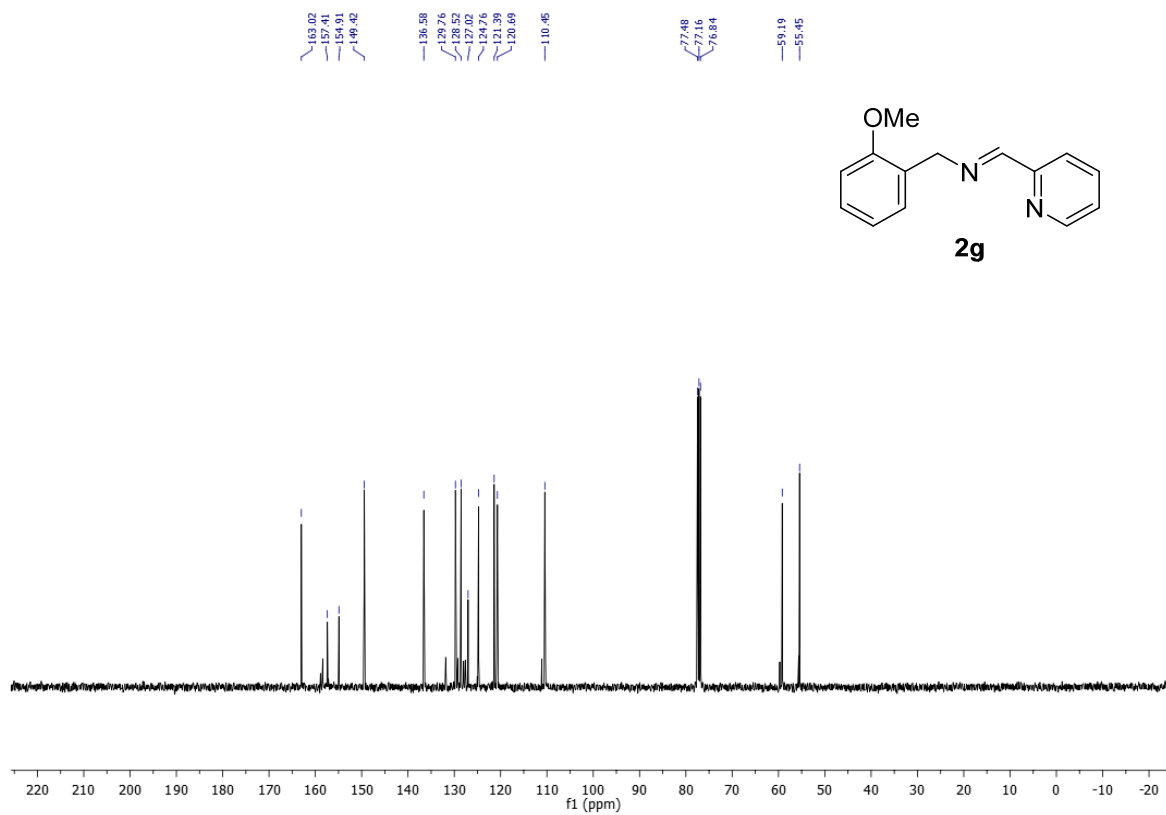

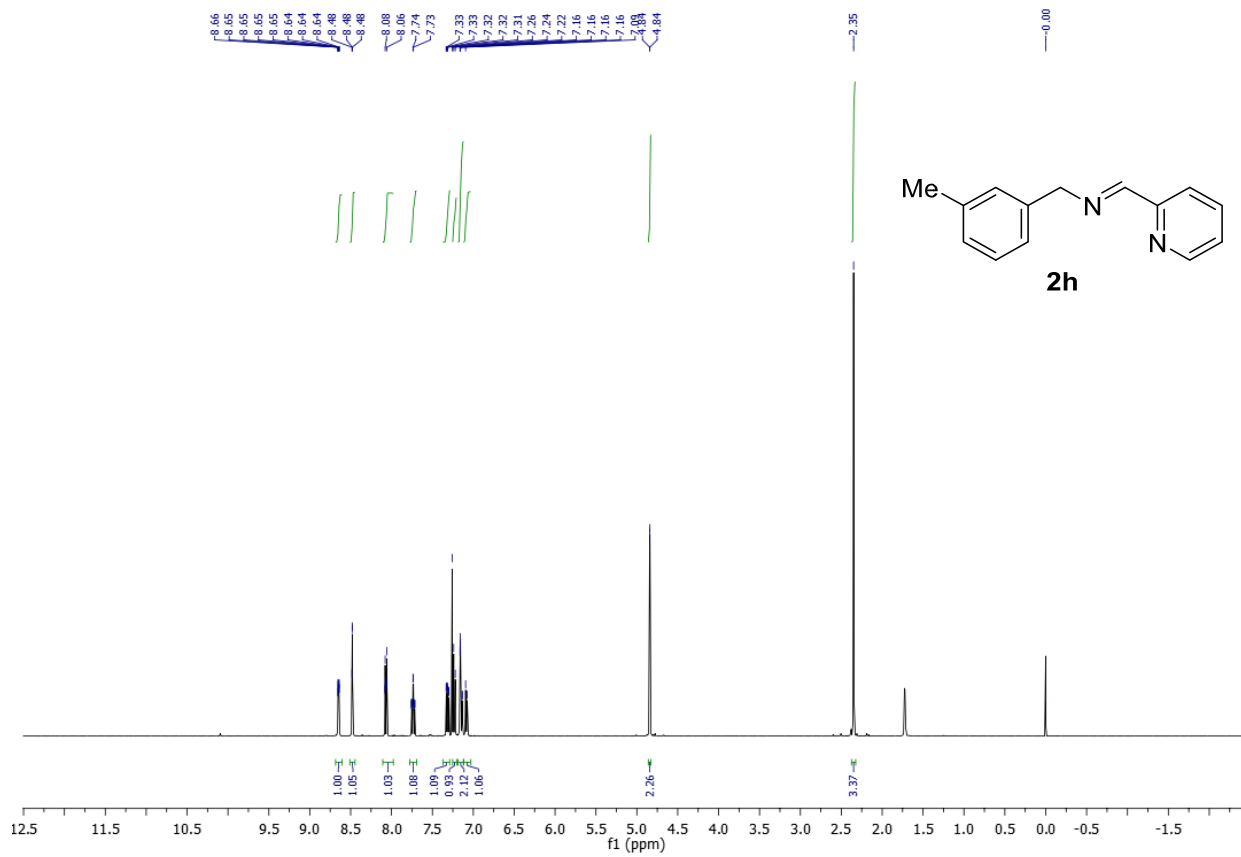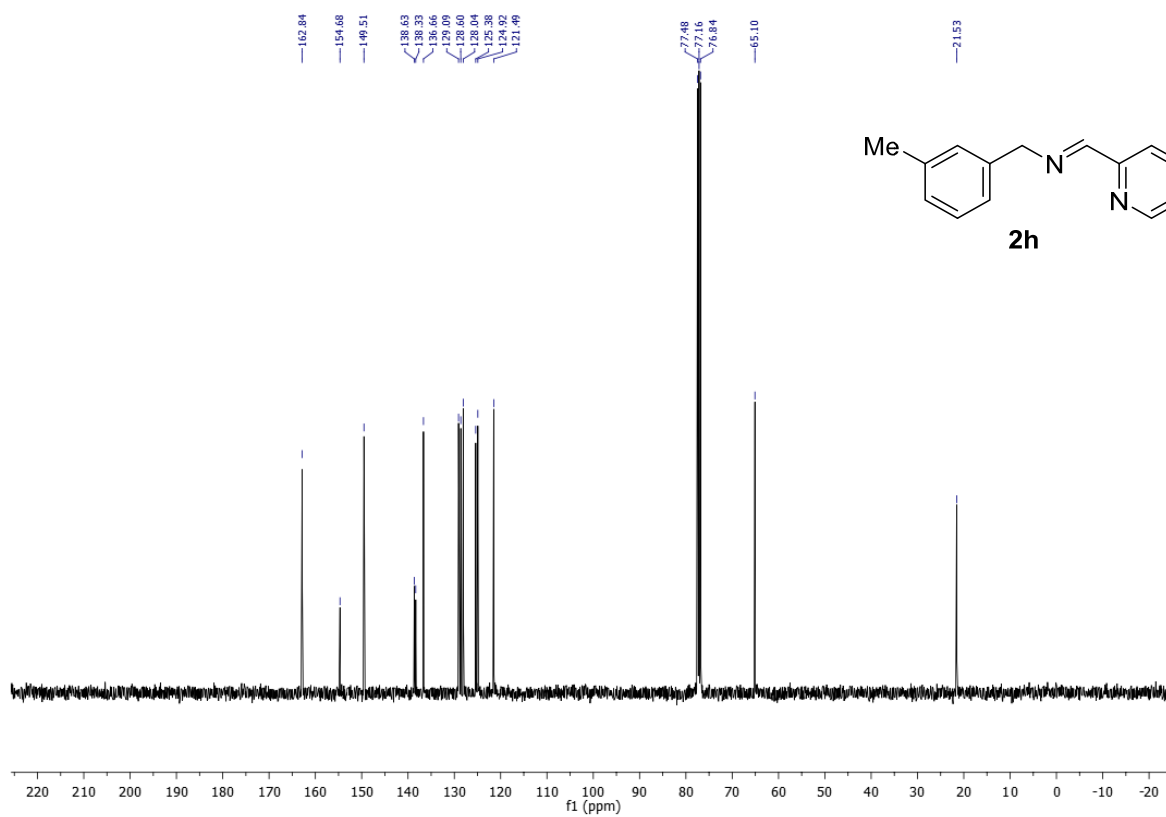

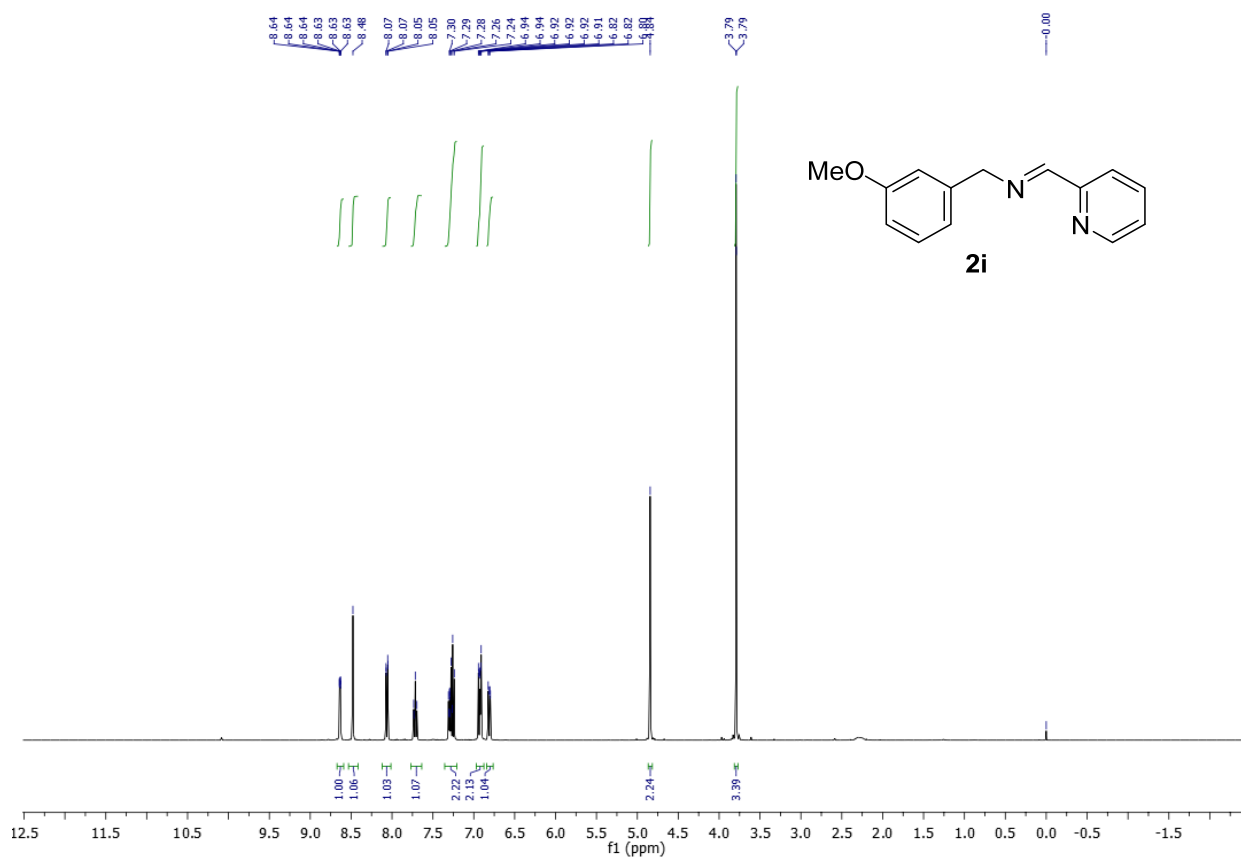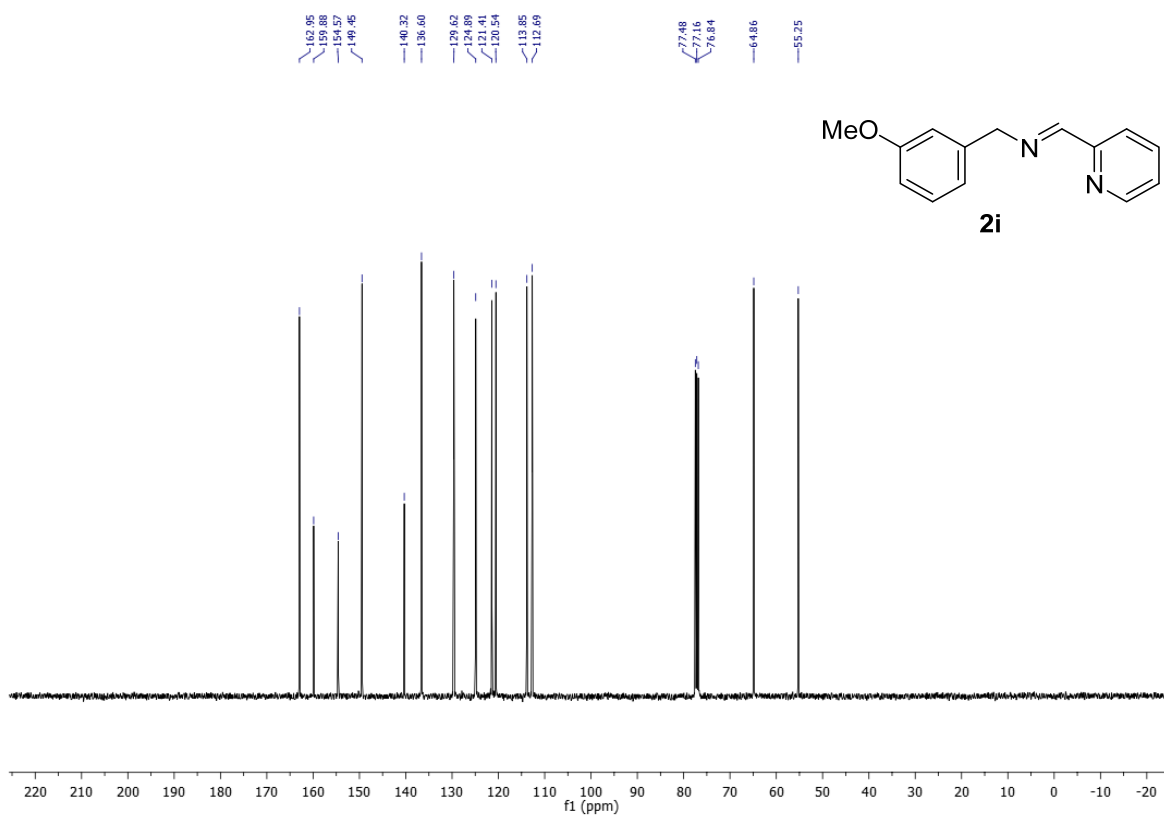

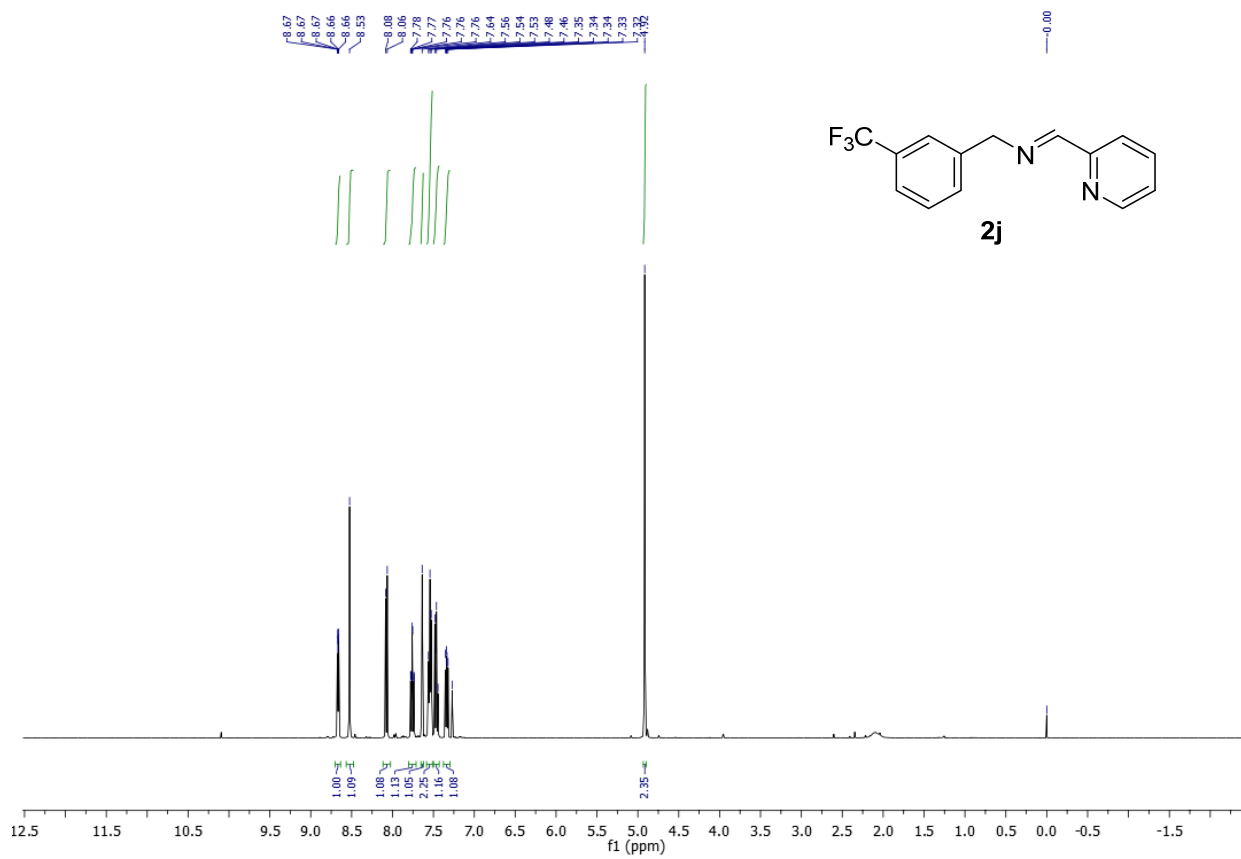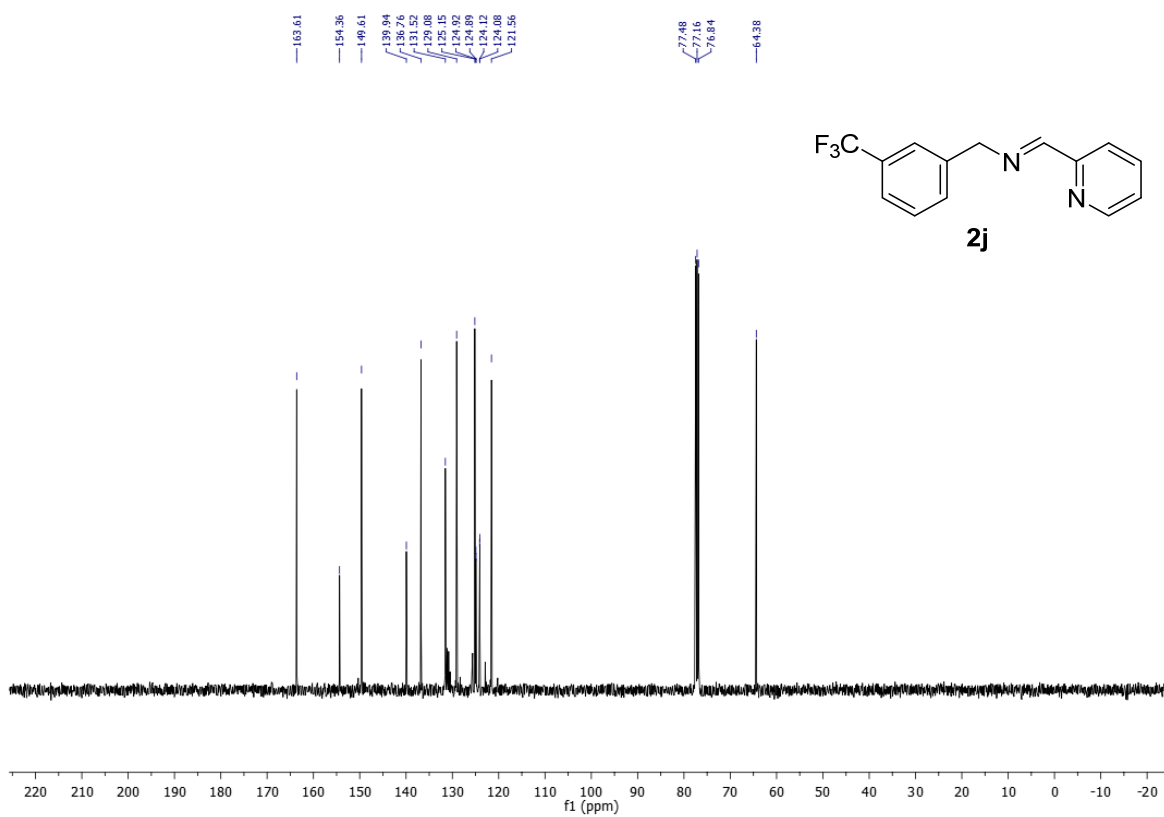

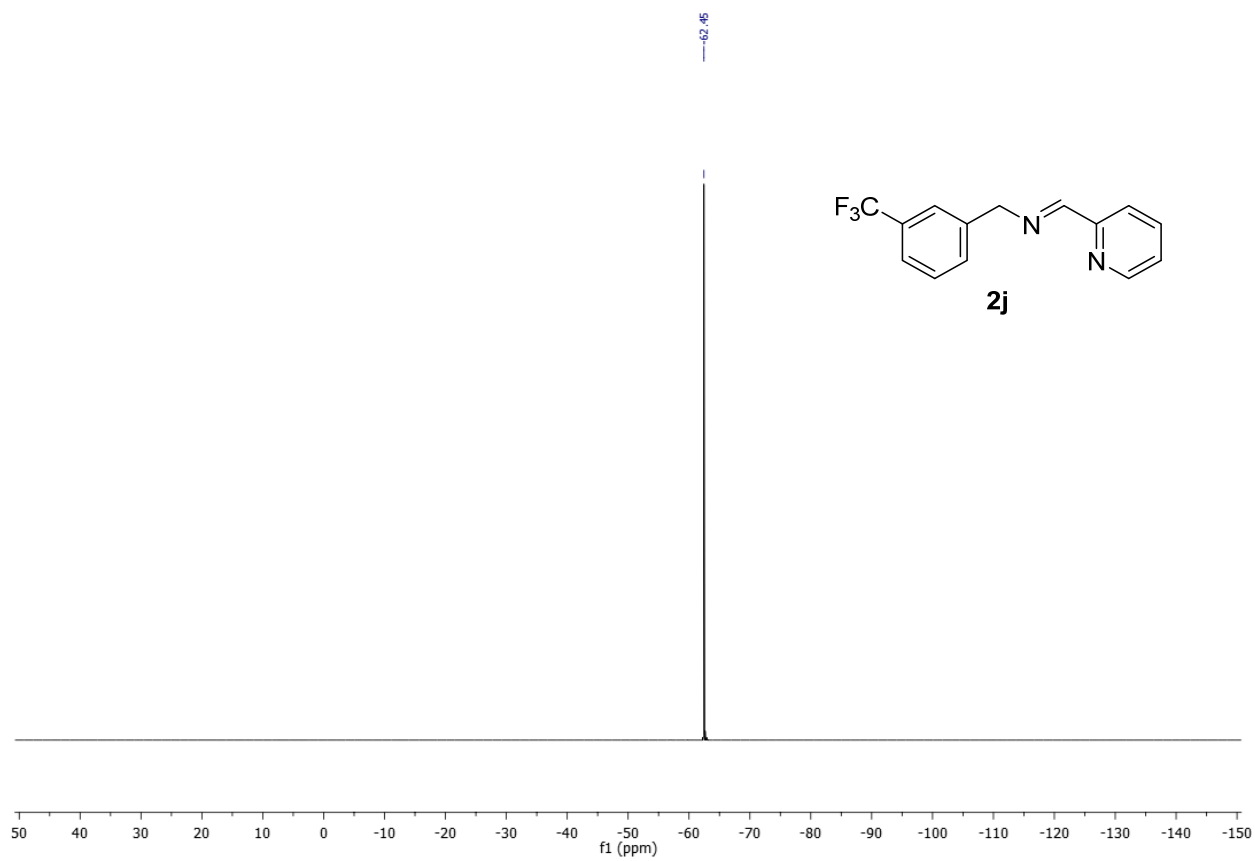



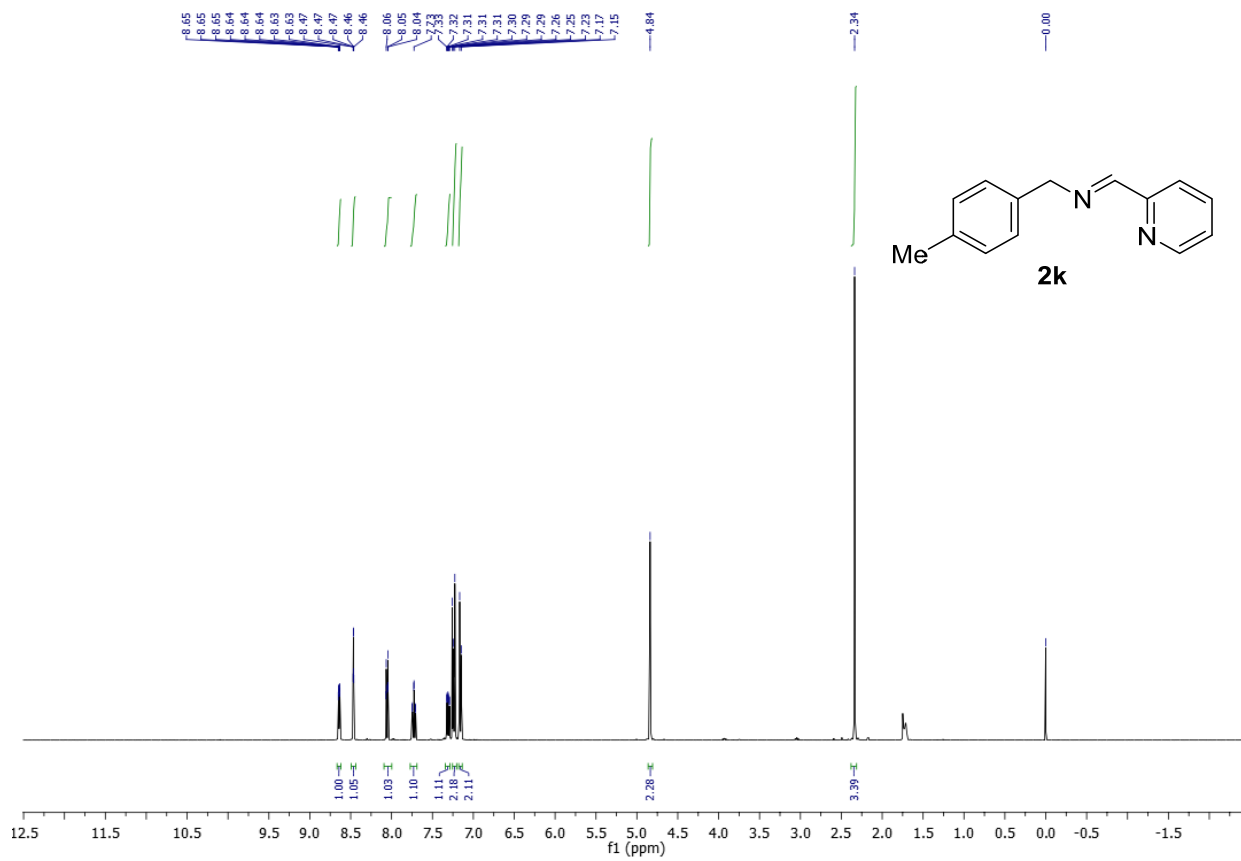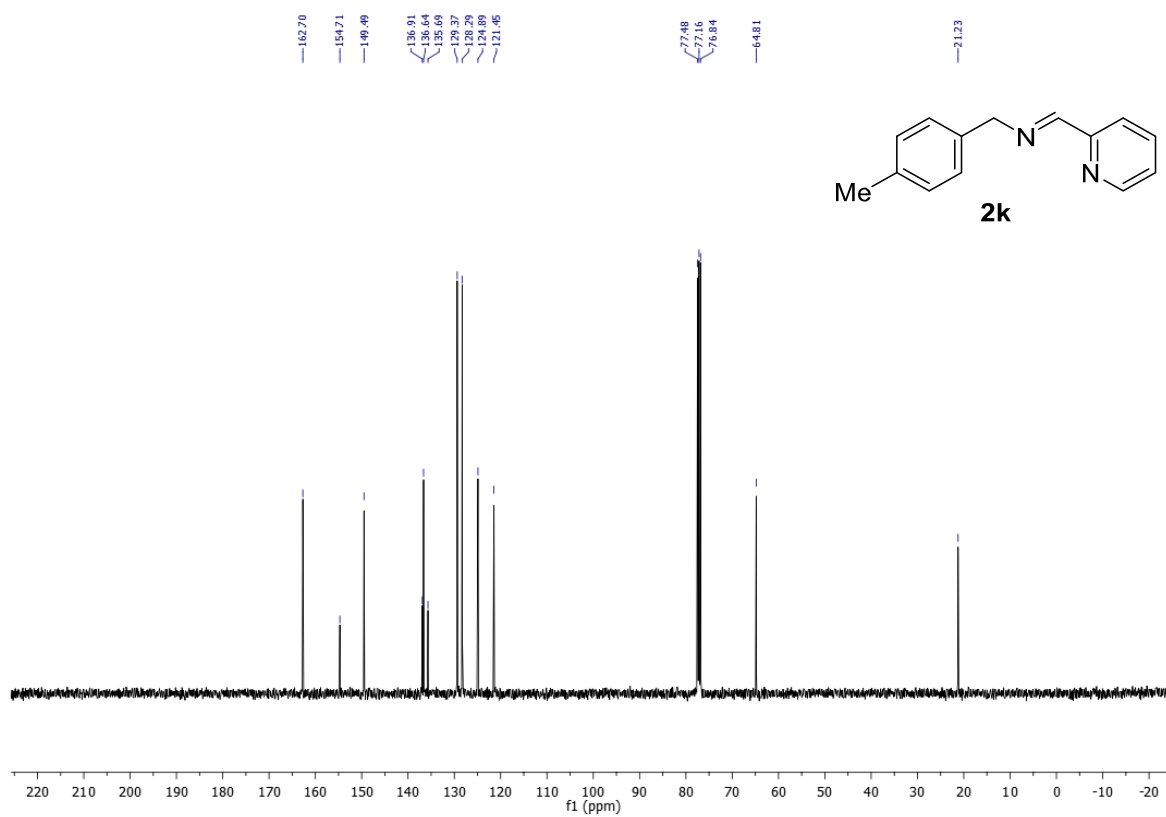

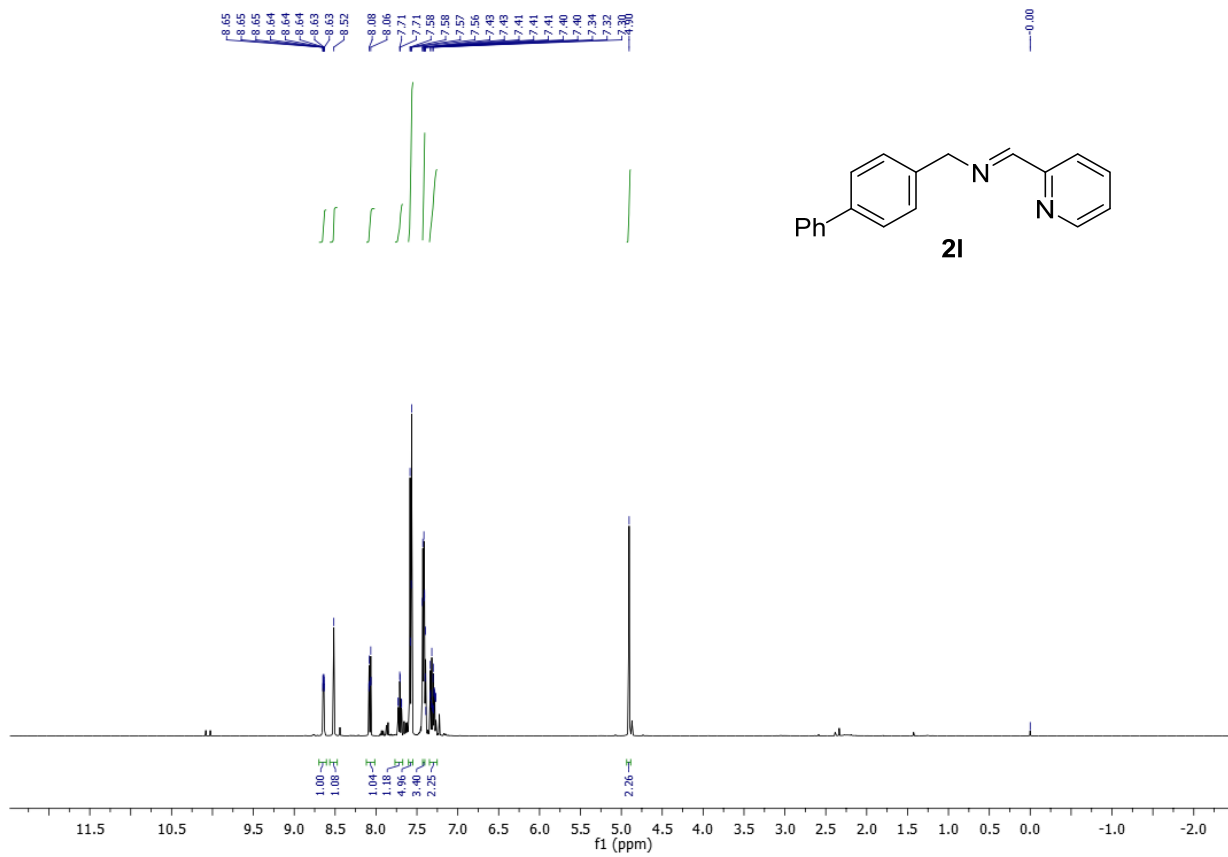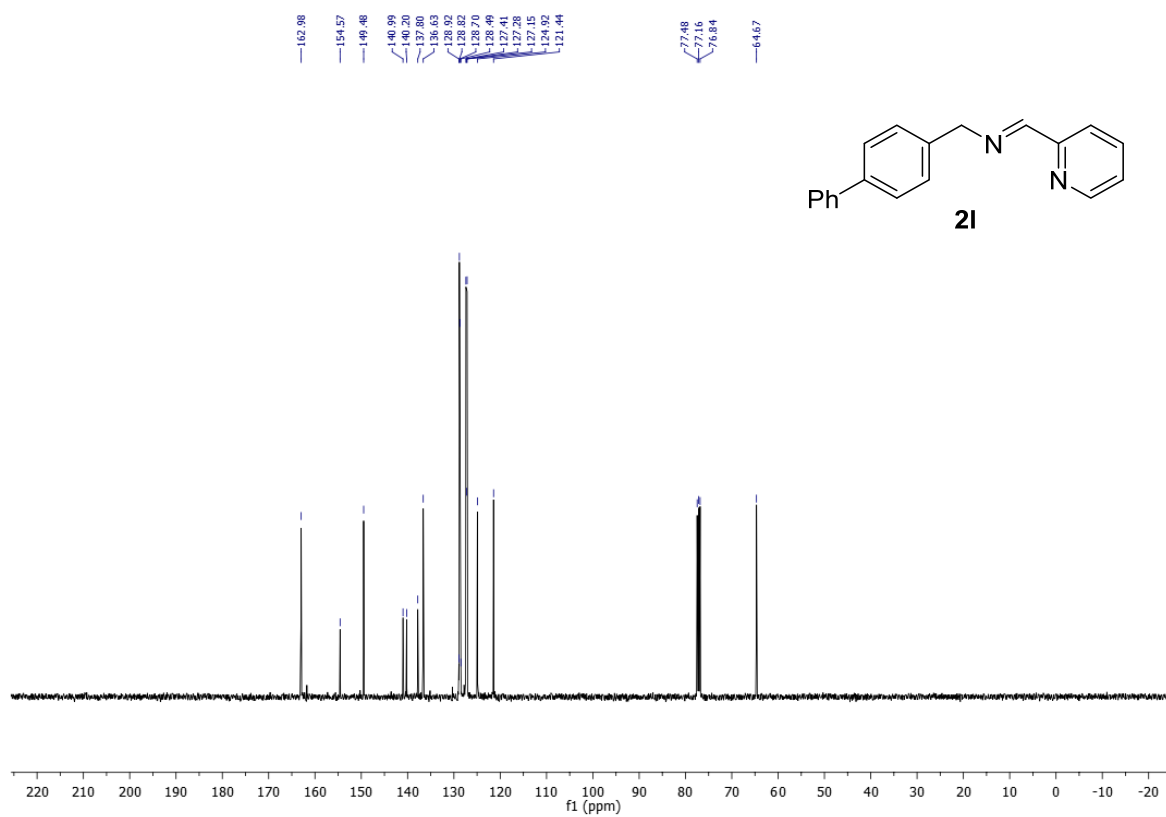

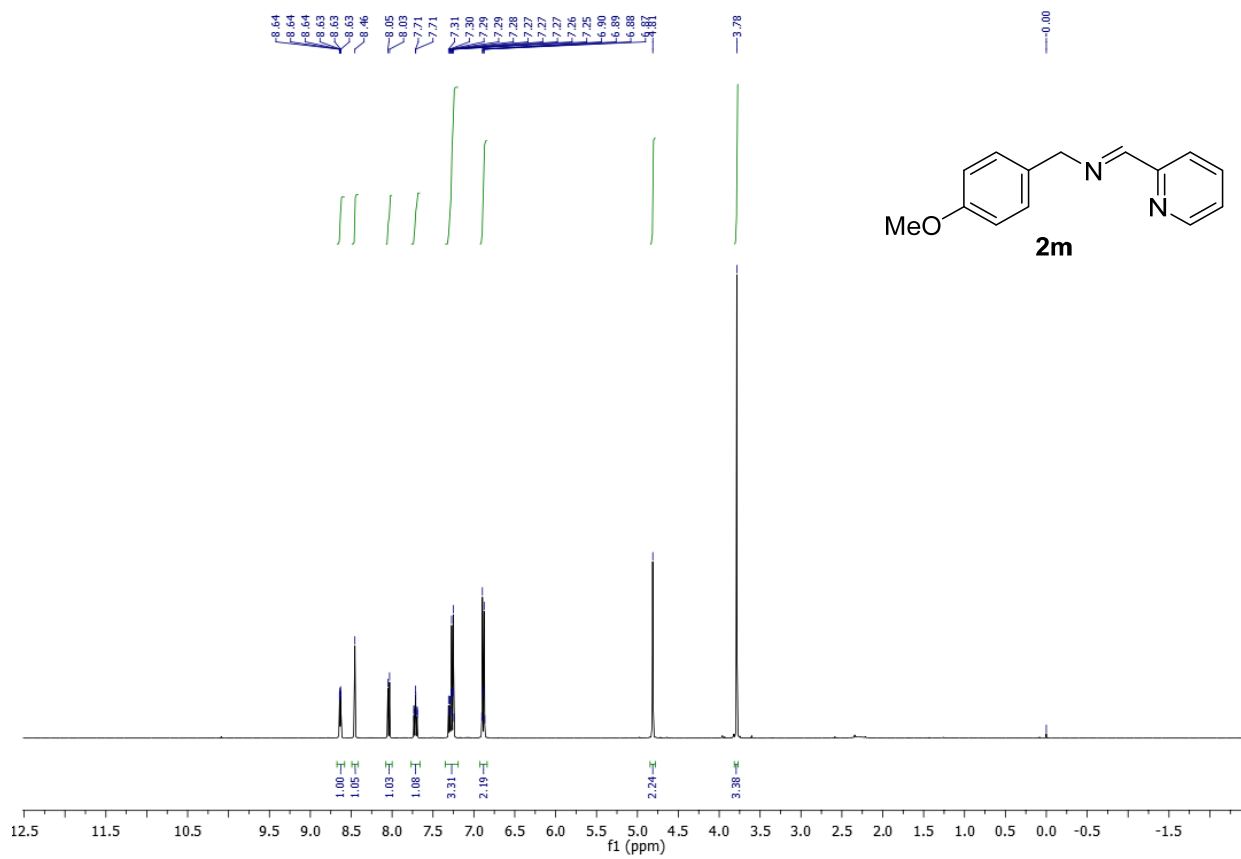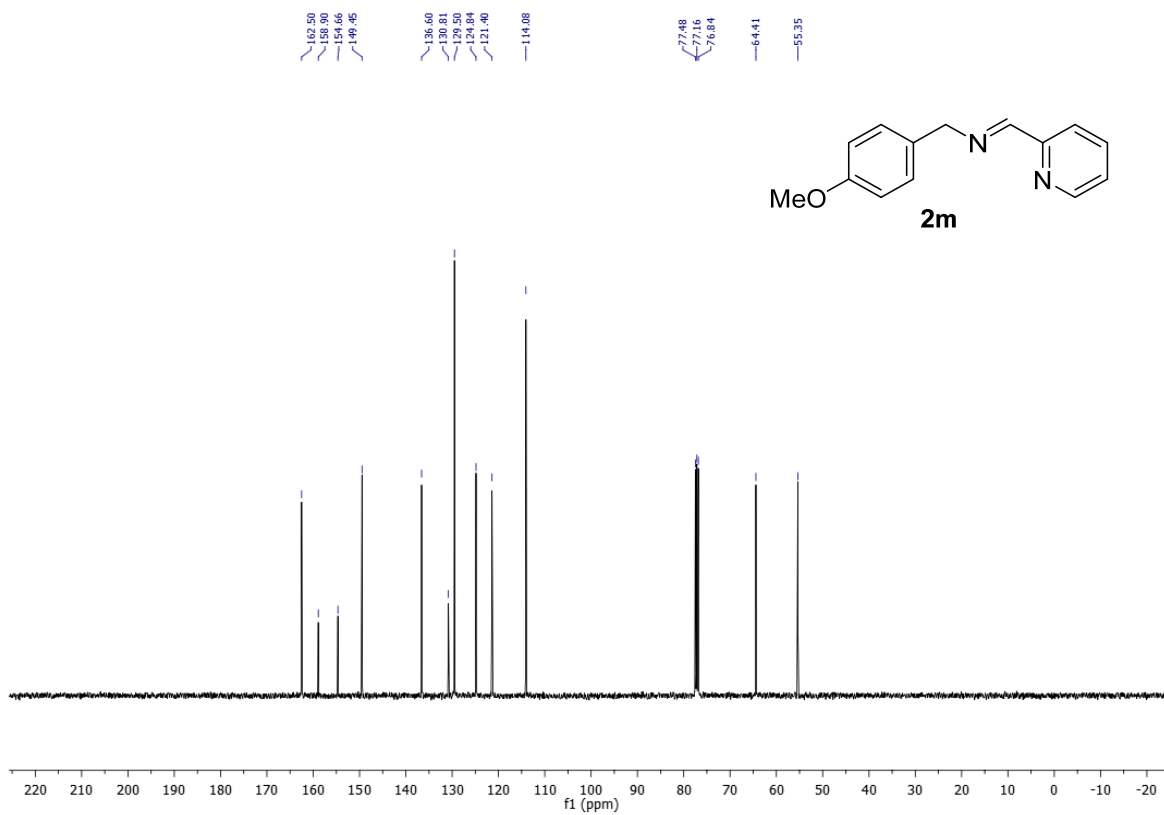

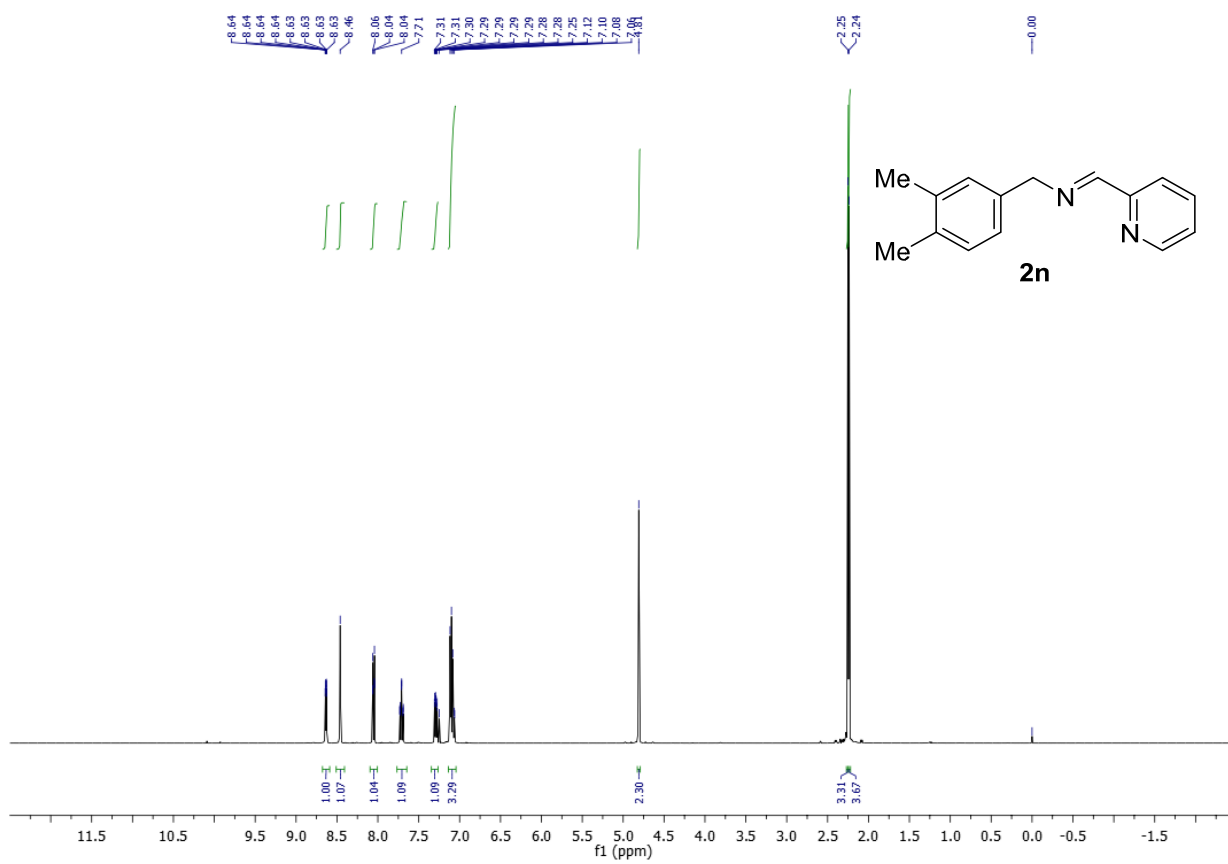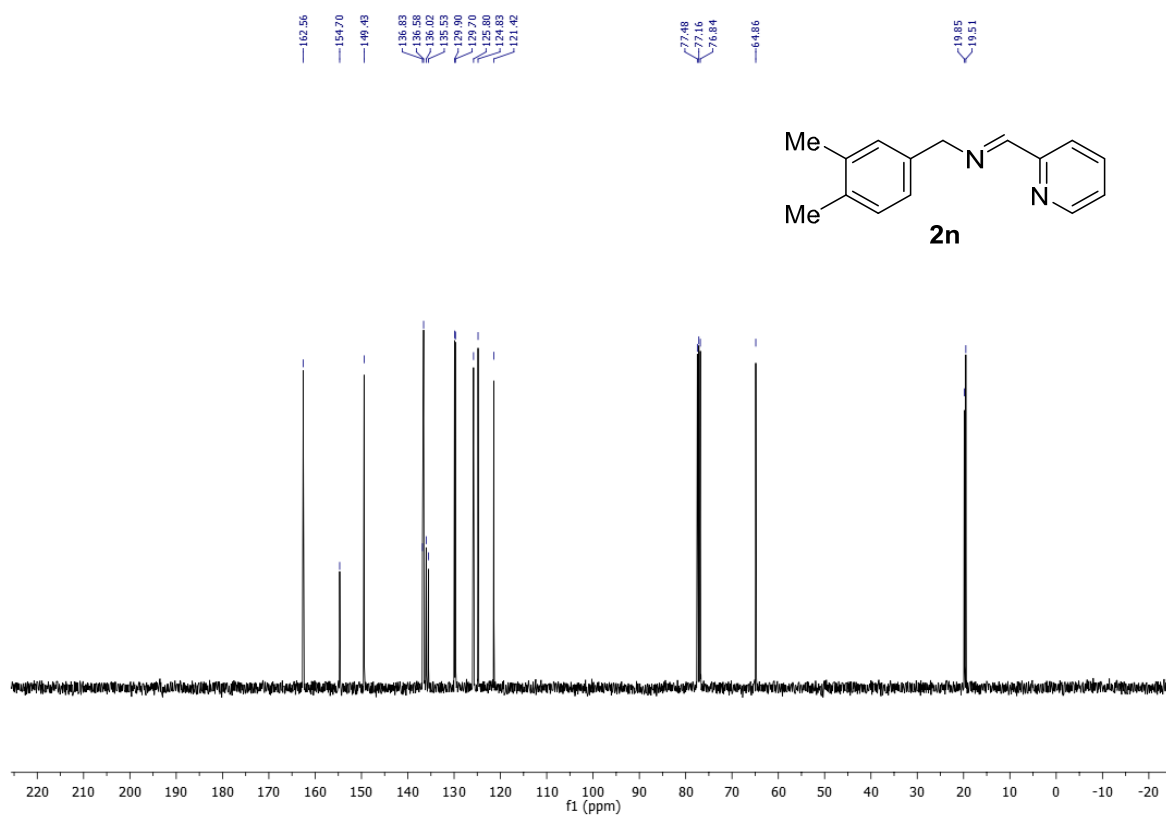

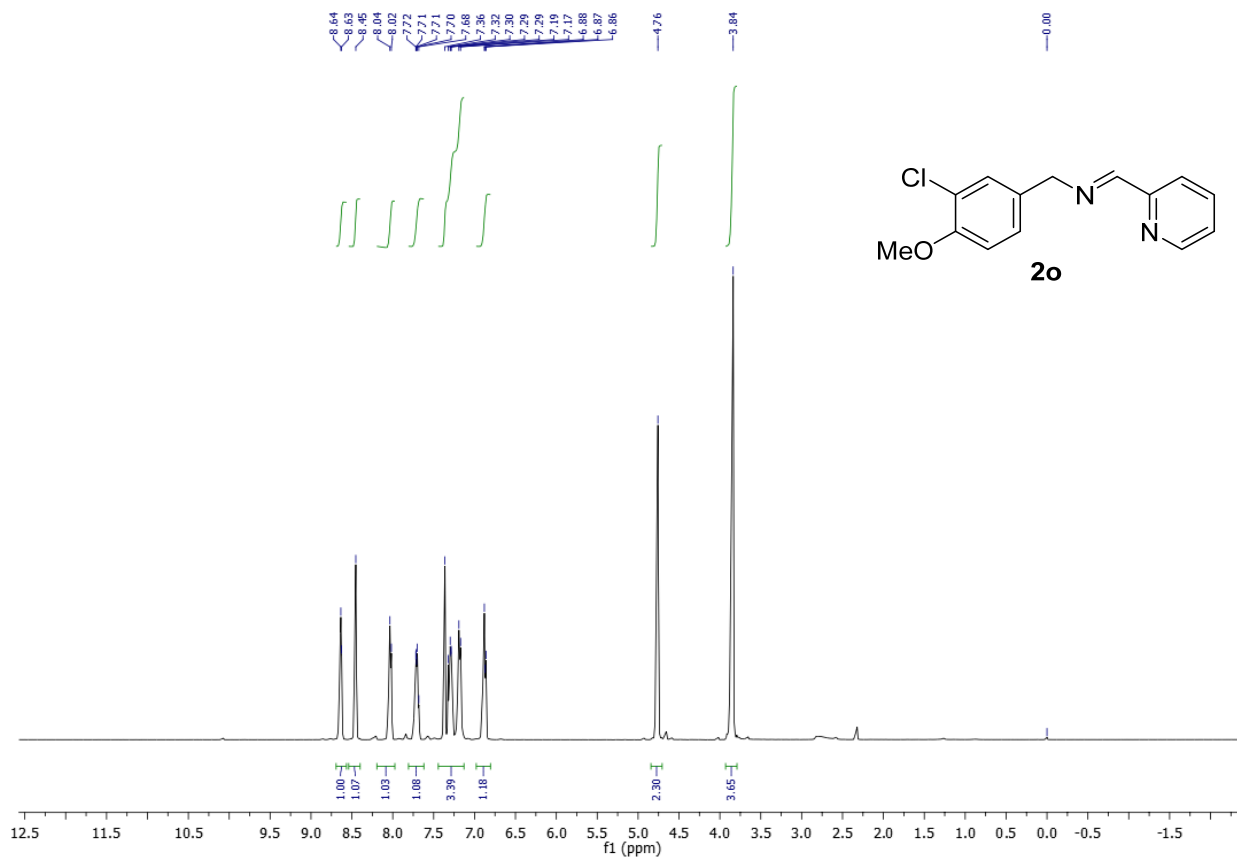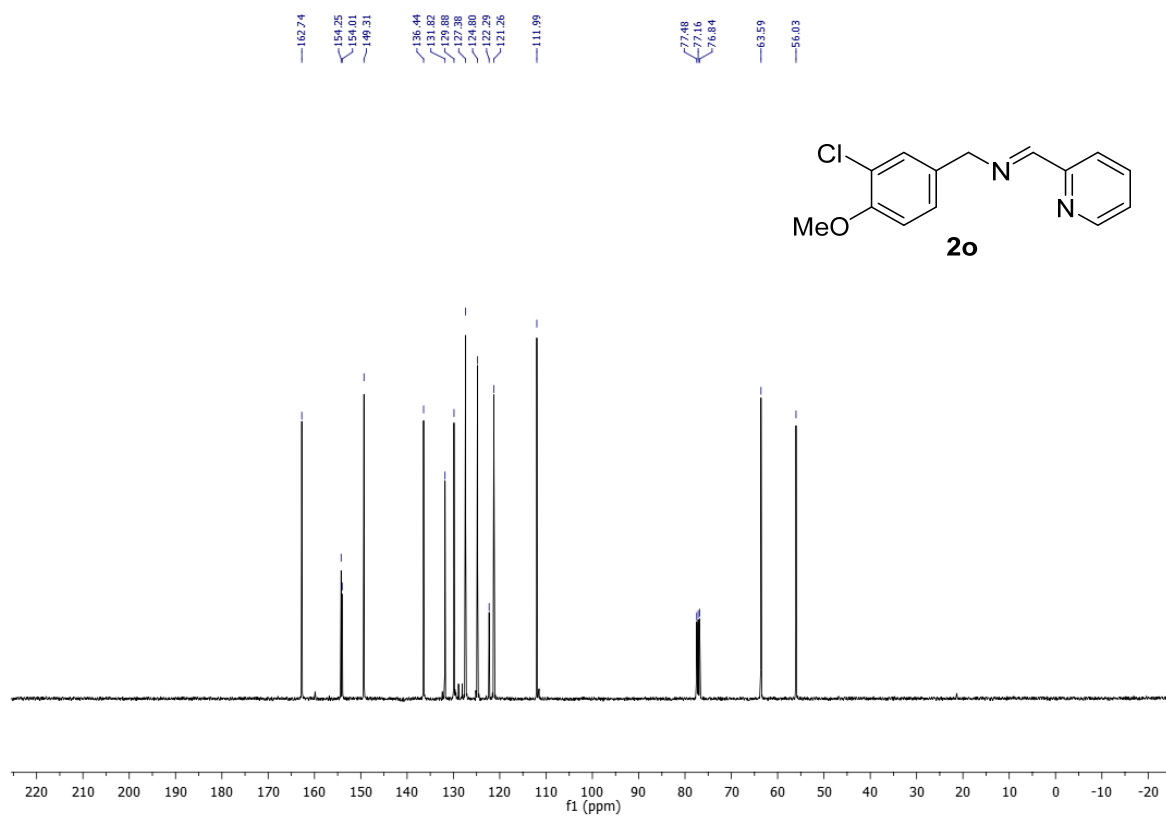

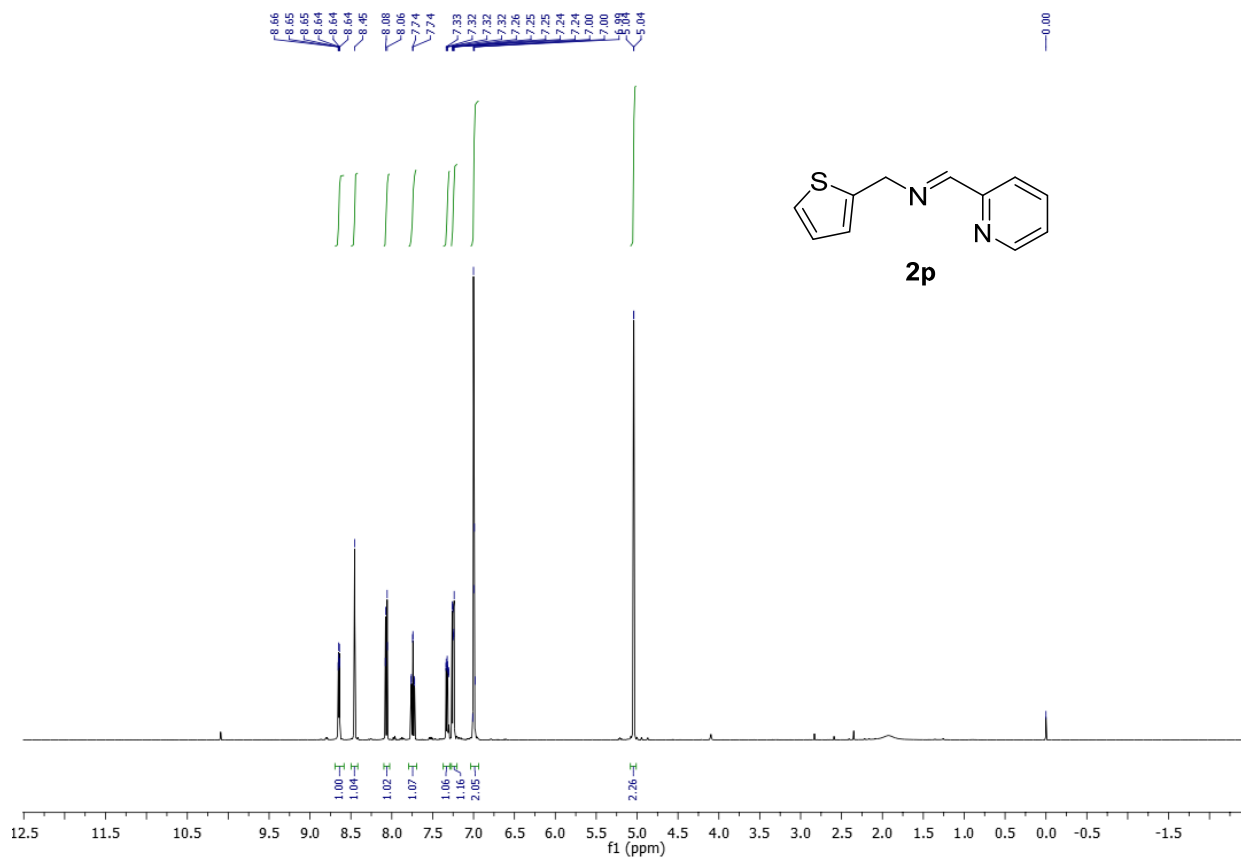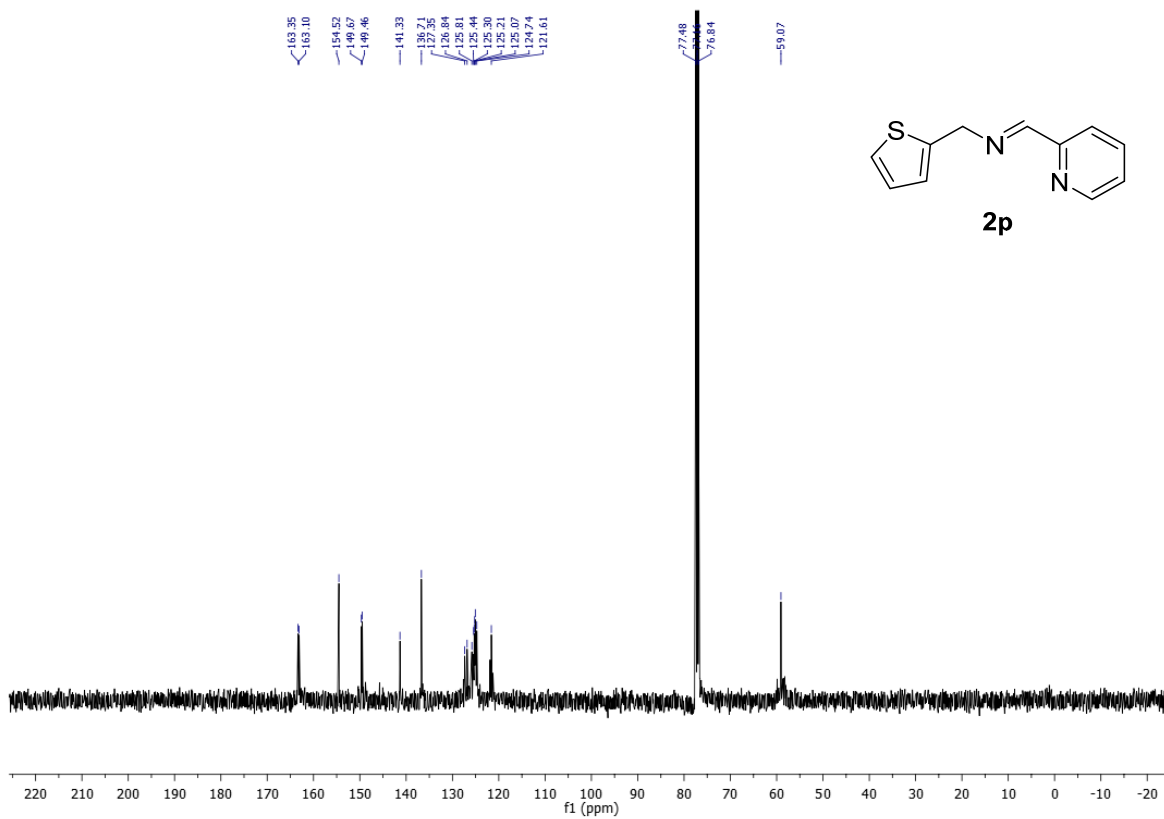

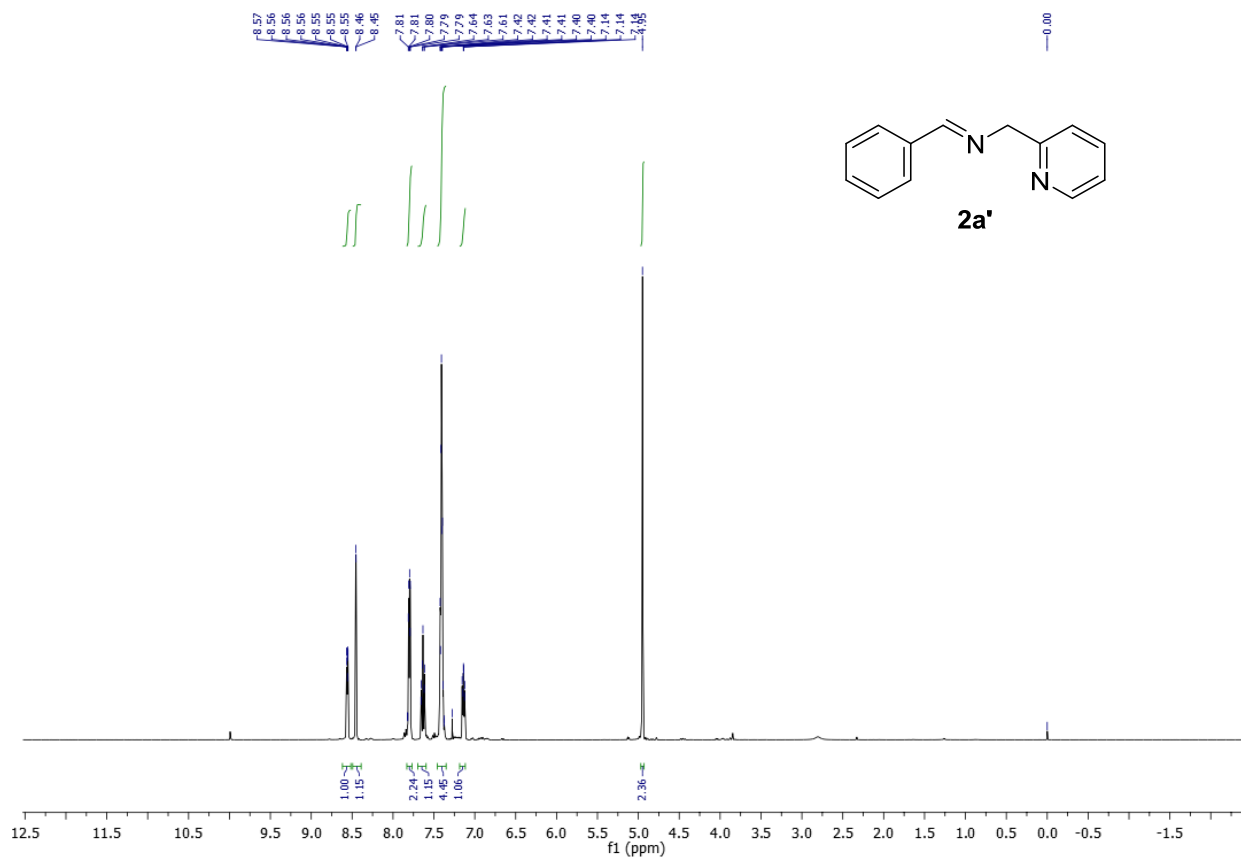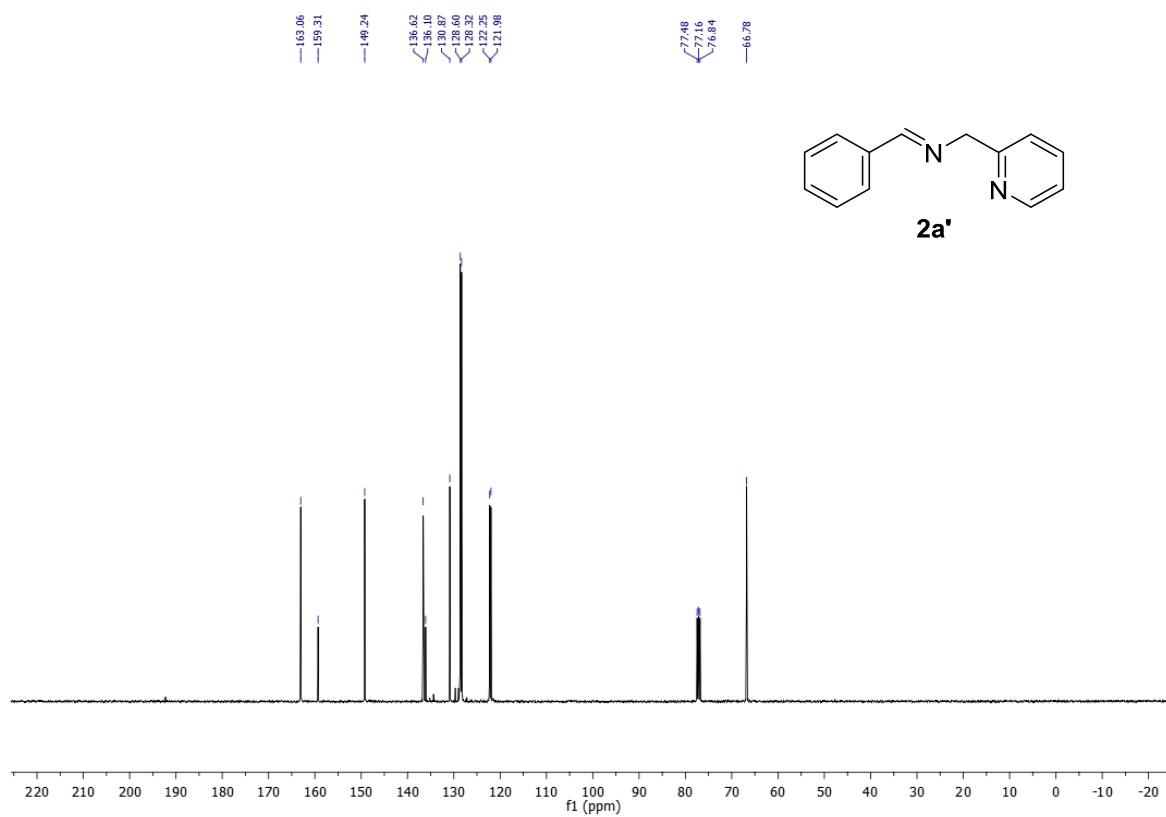

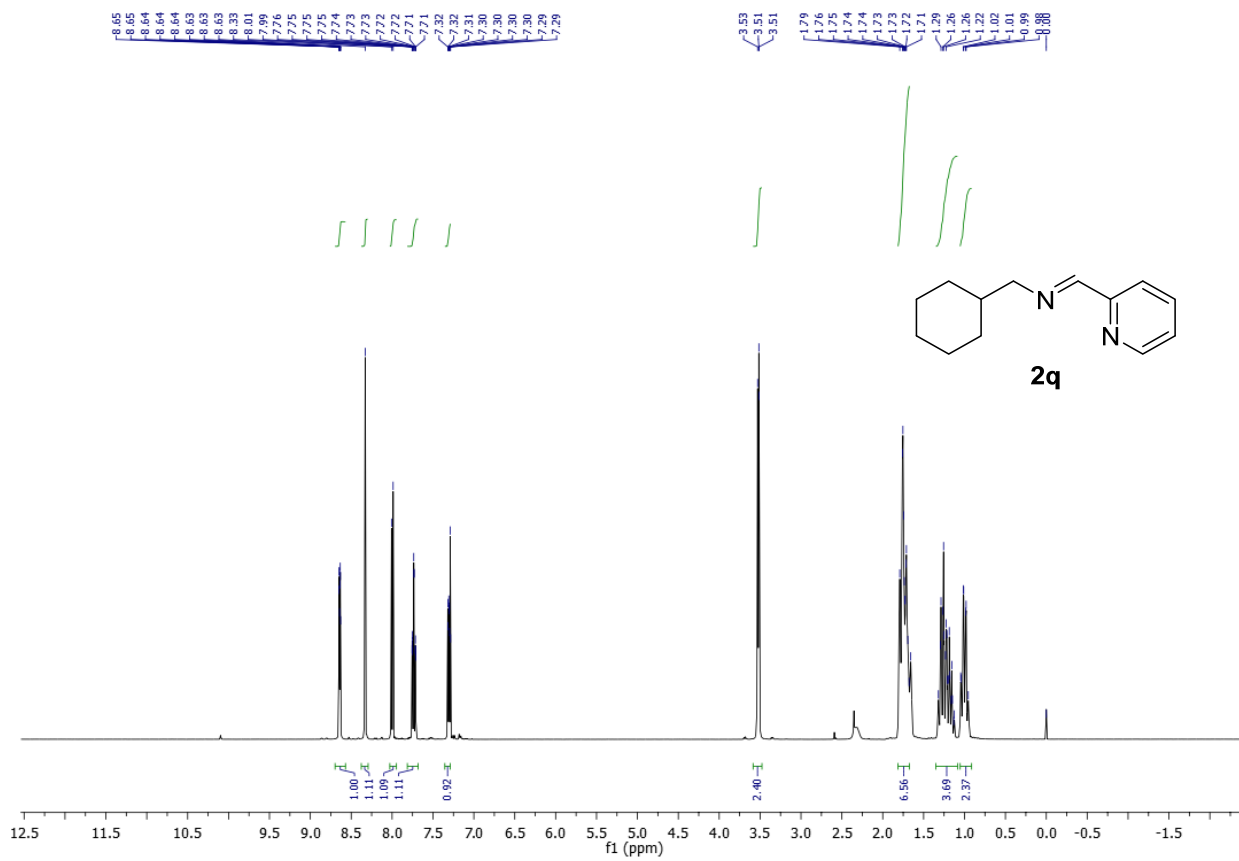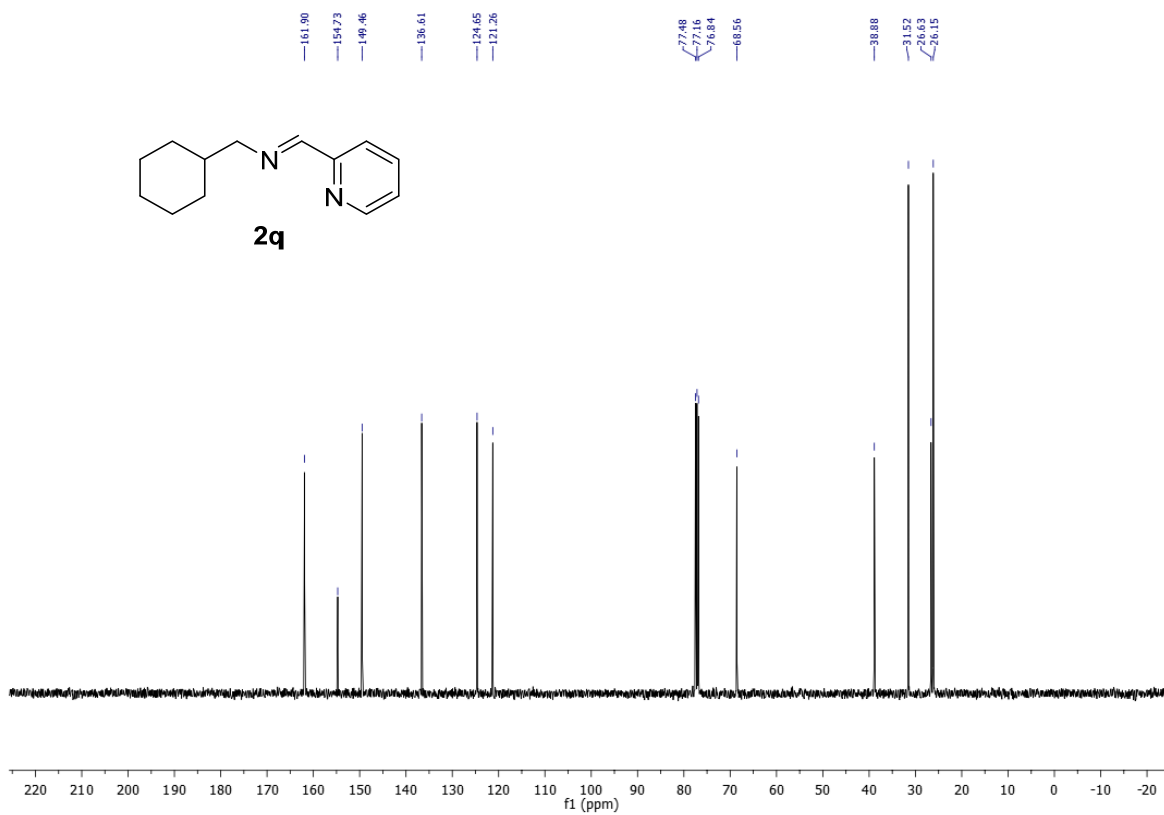



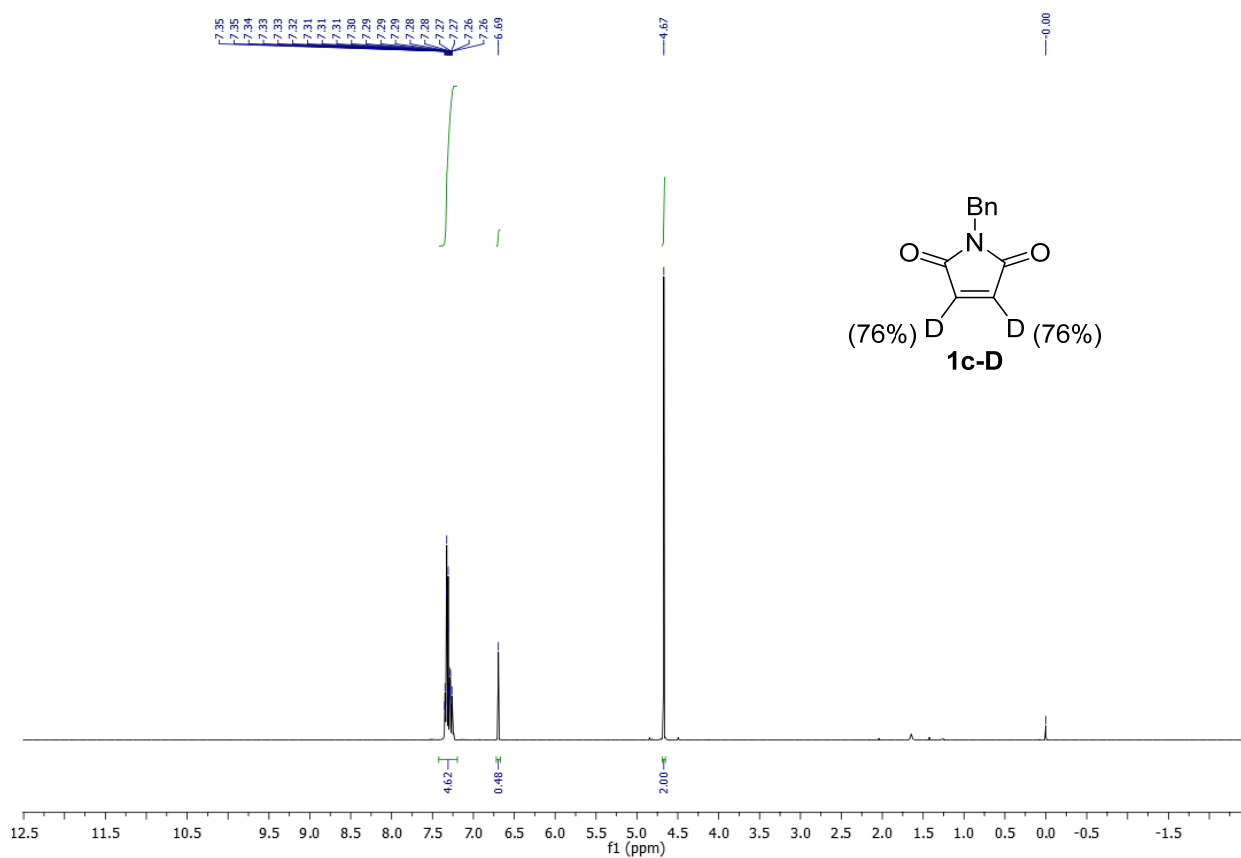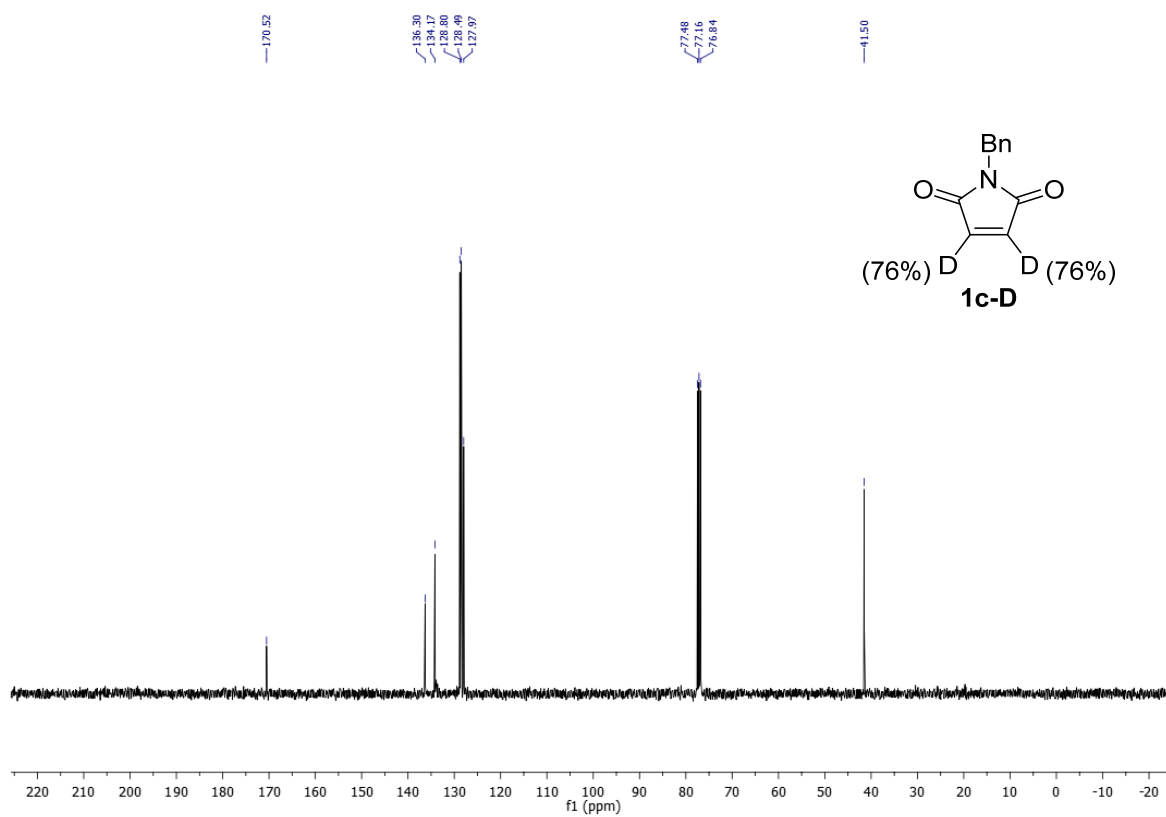

# NMR spectra of products

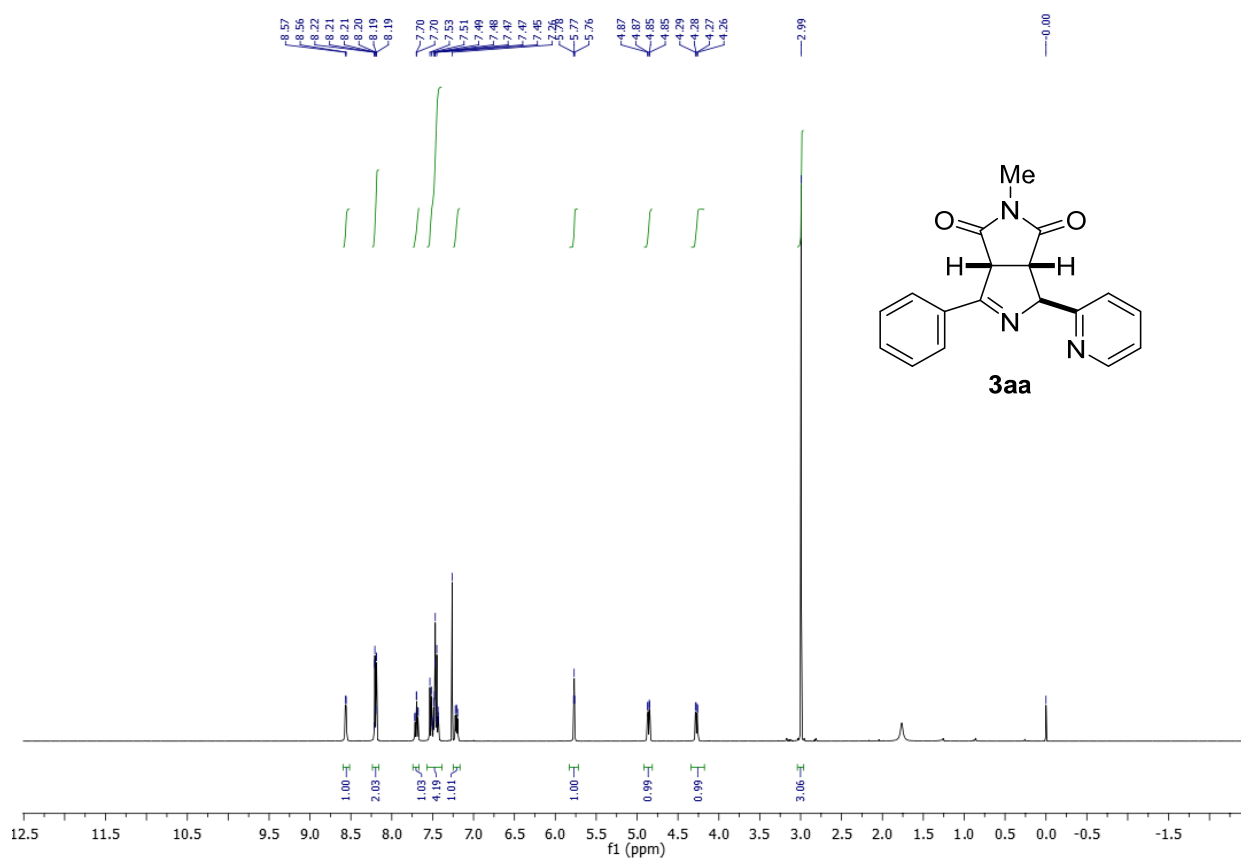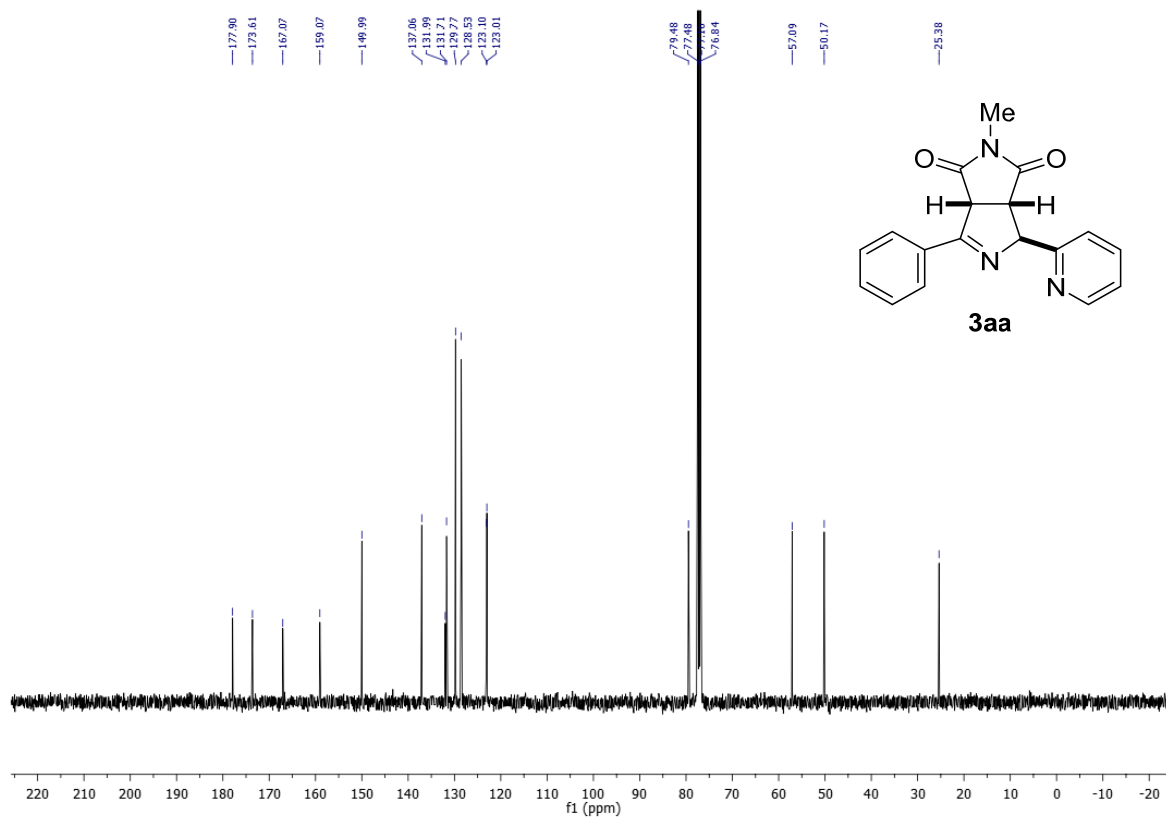

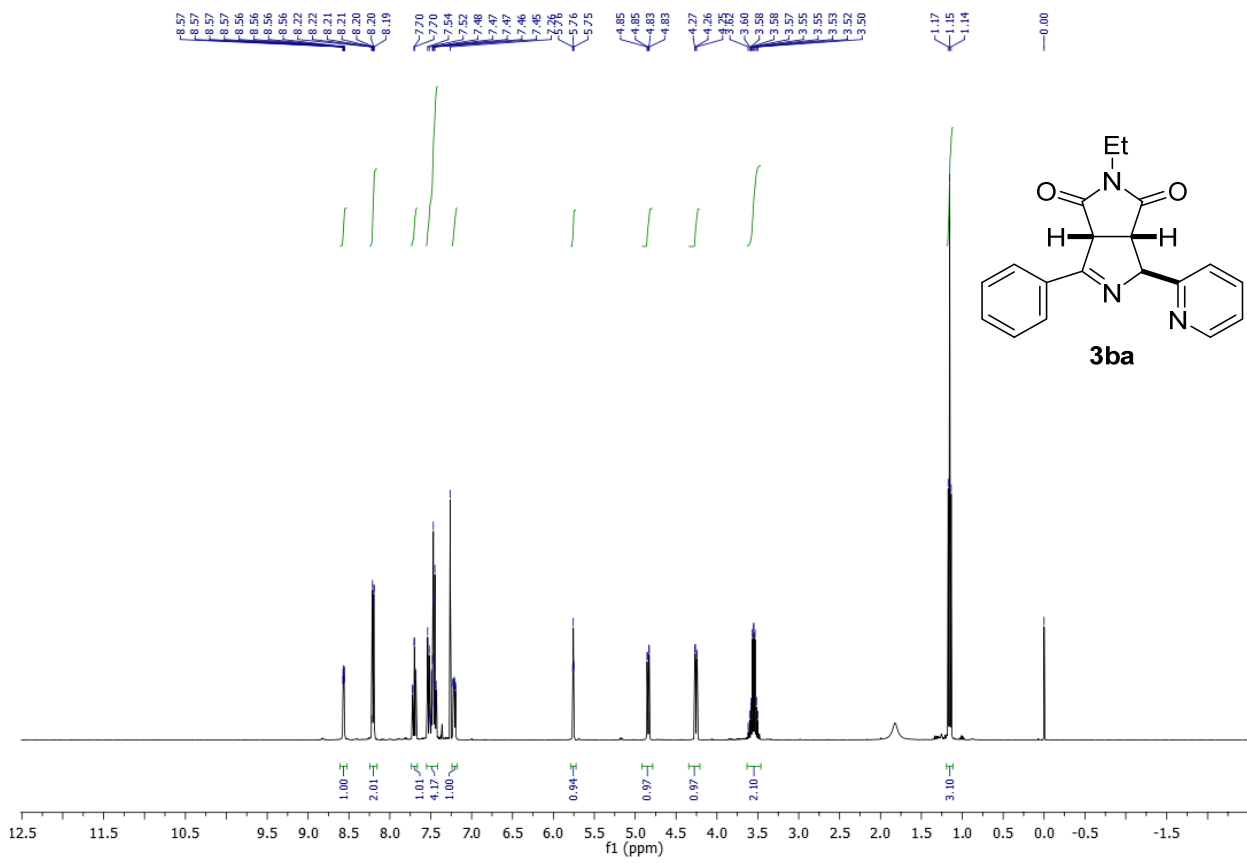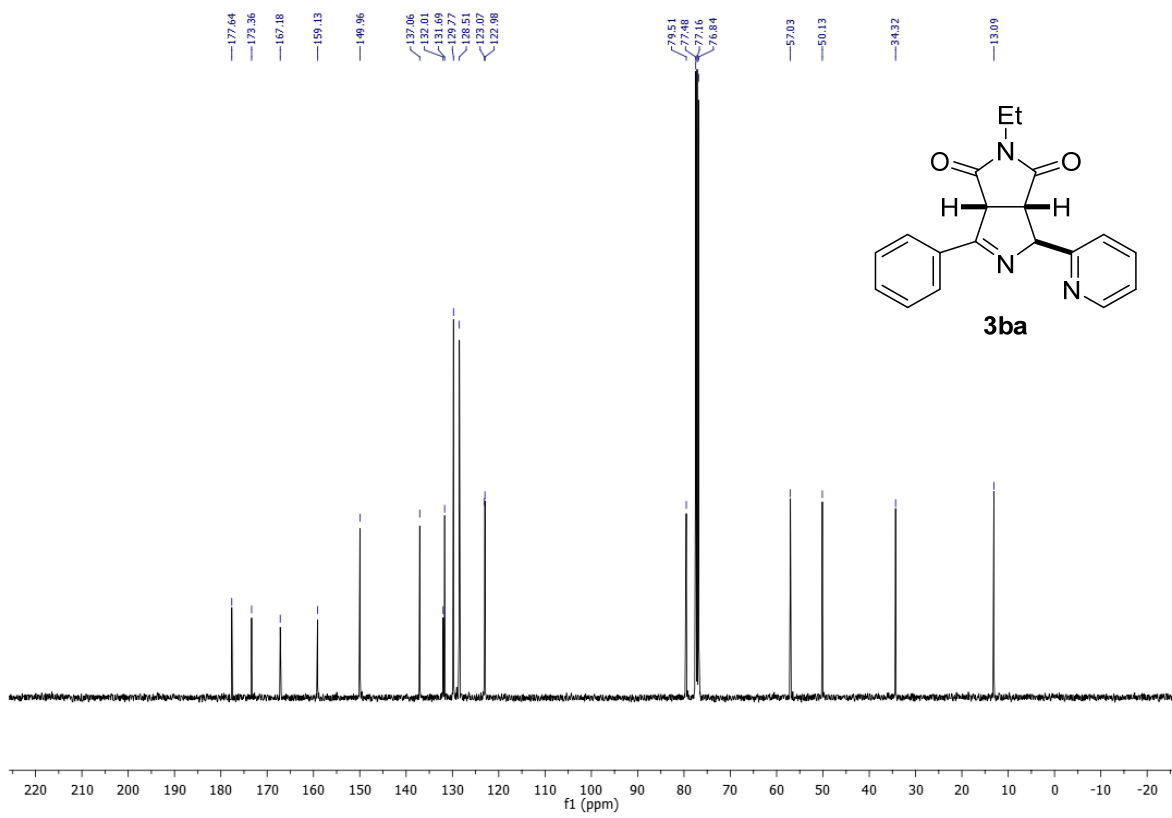

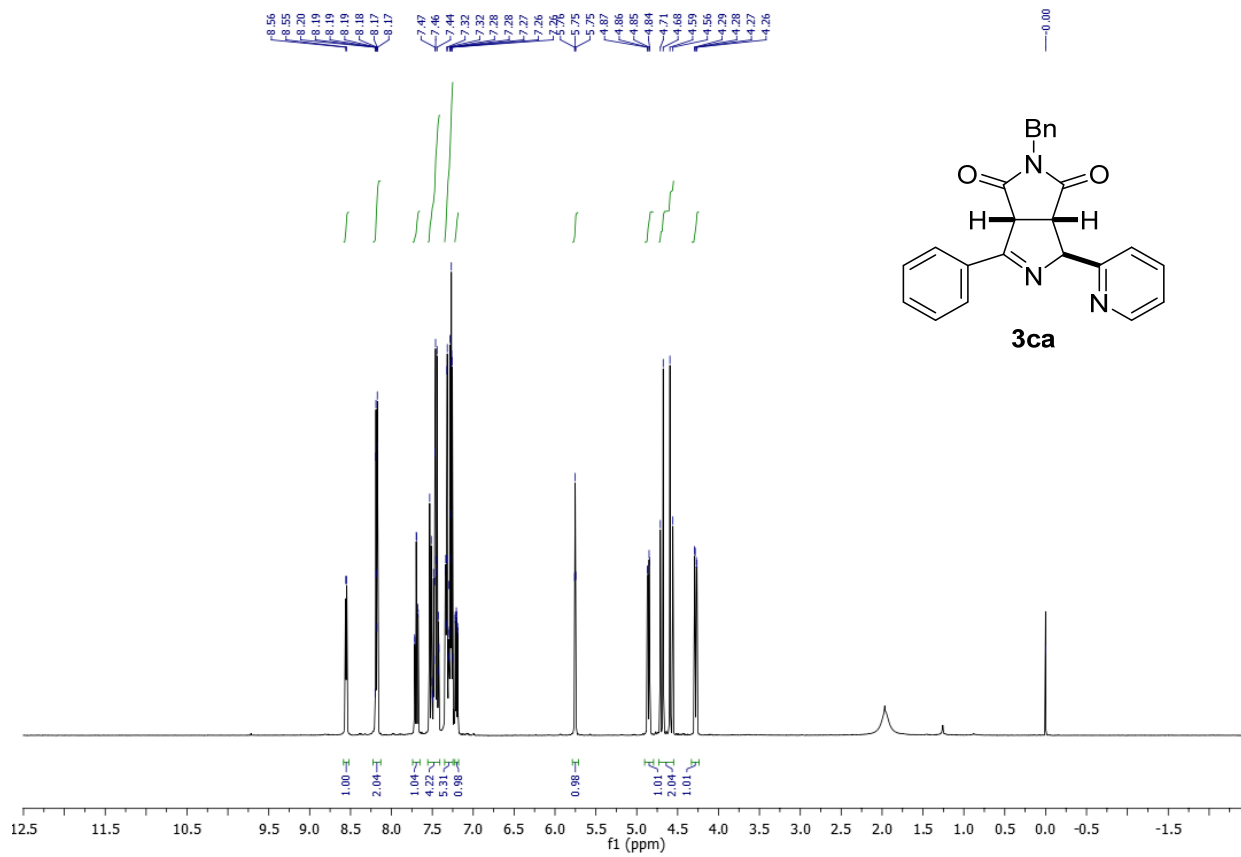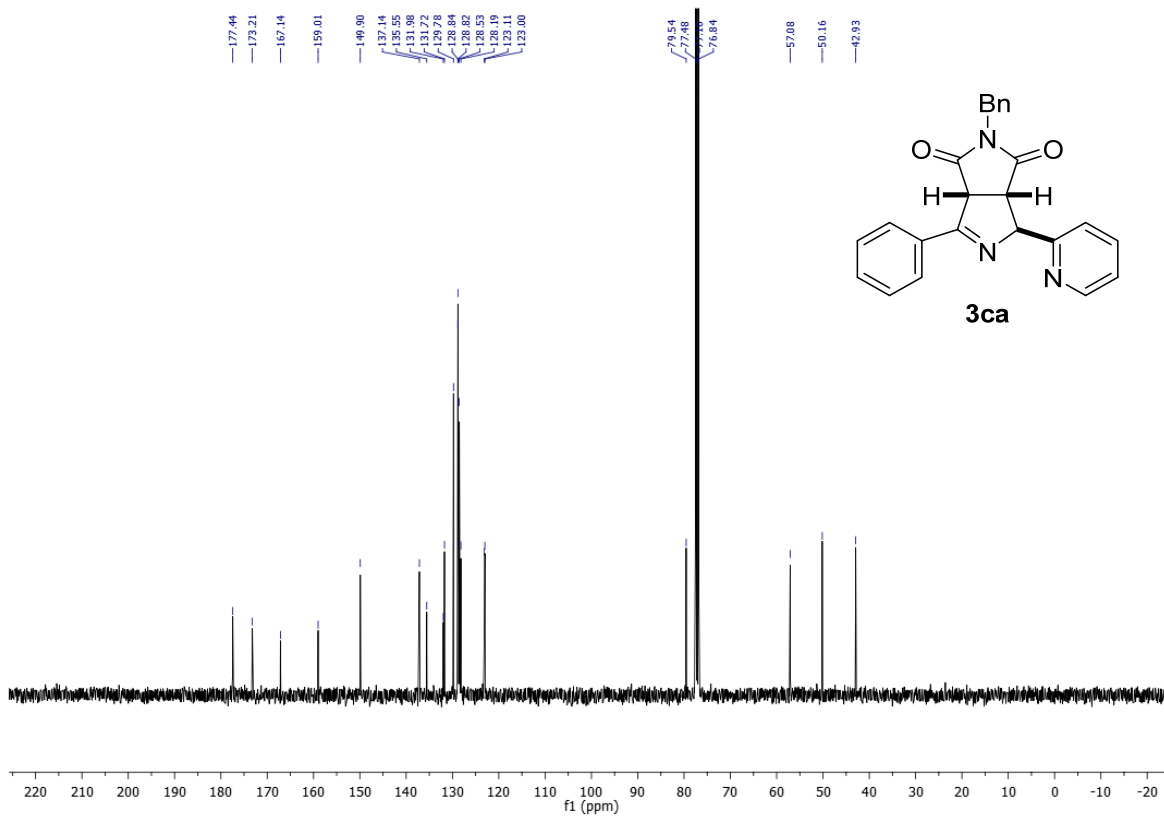

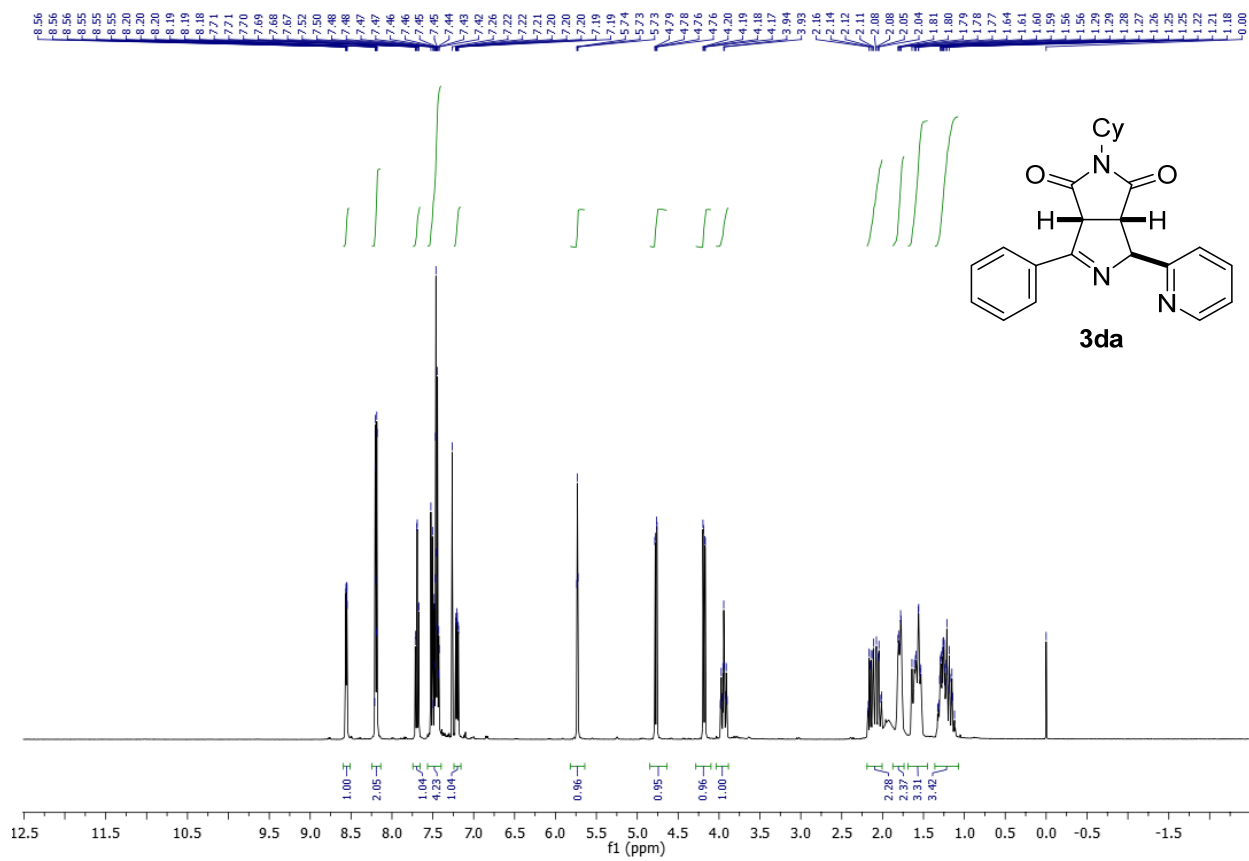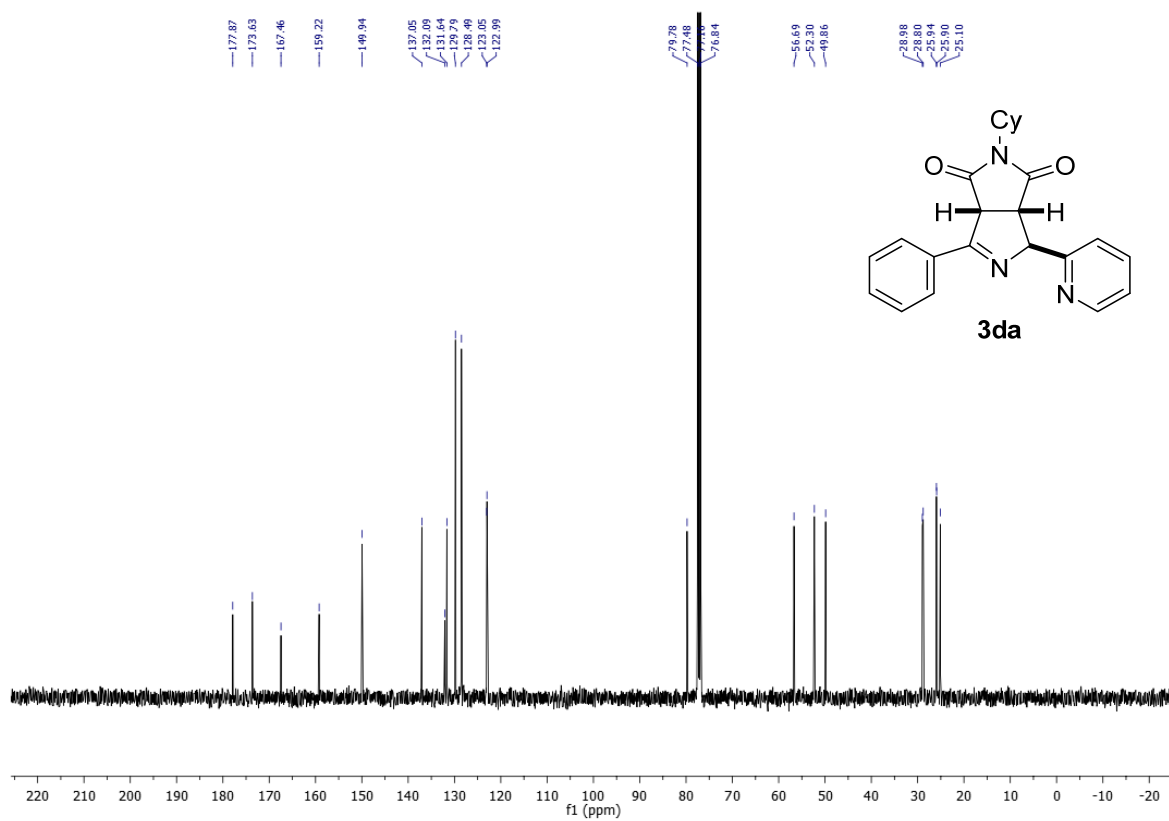

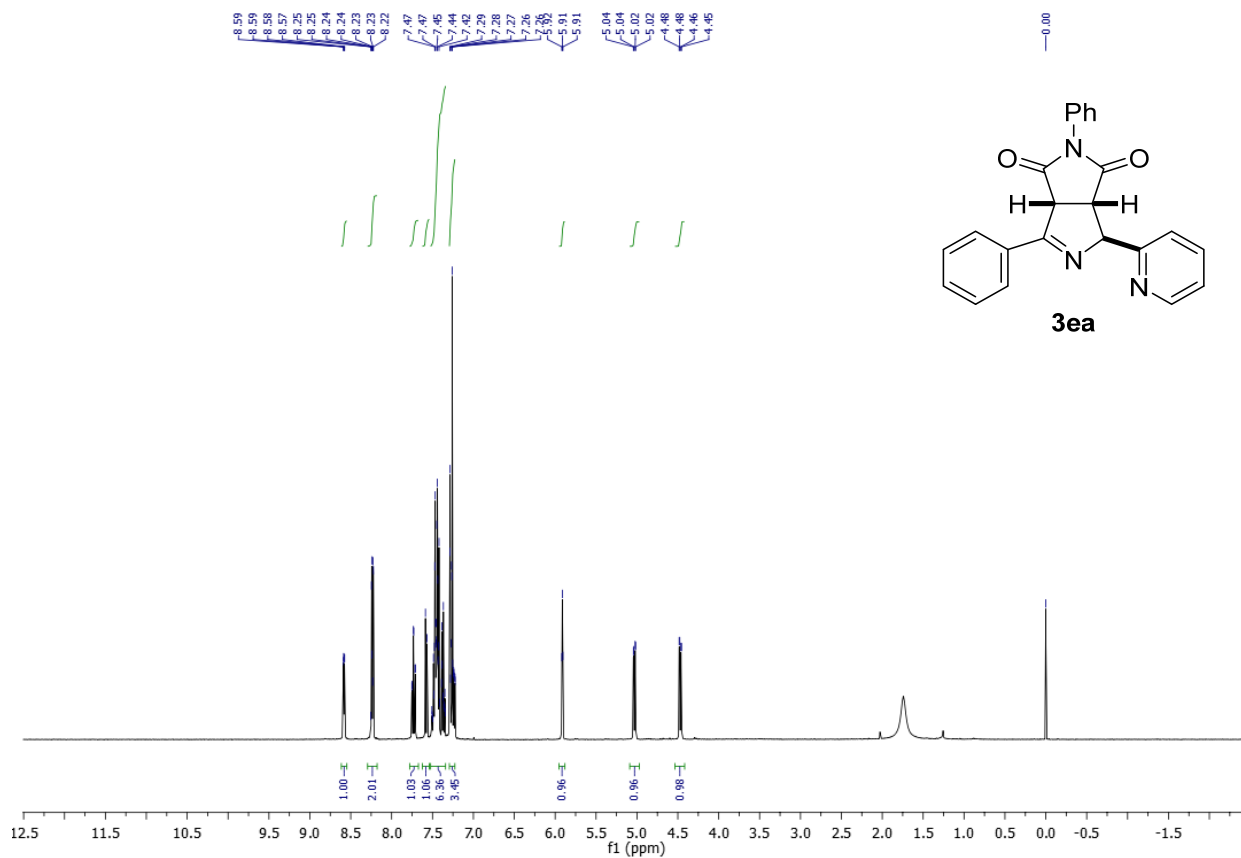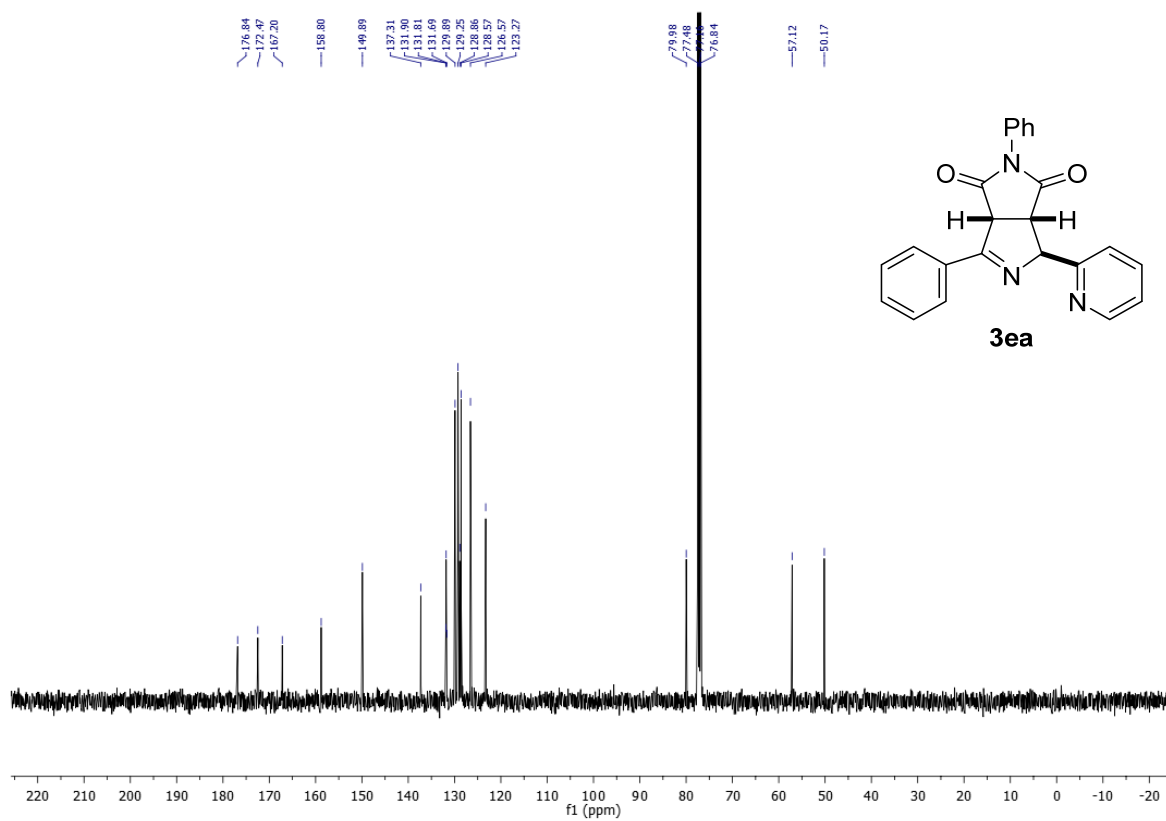

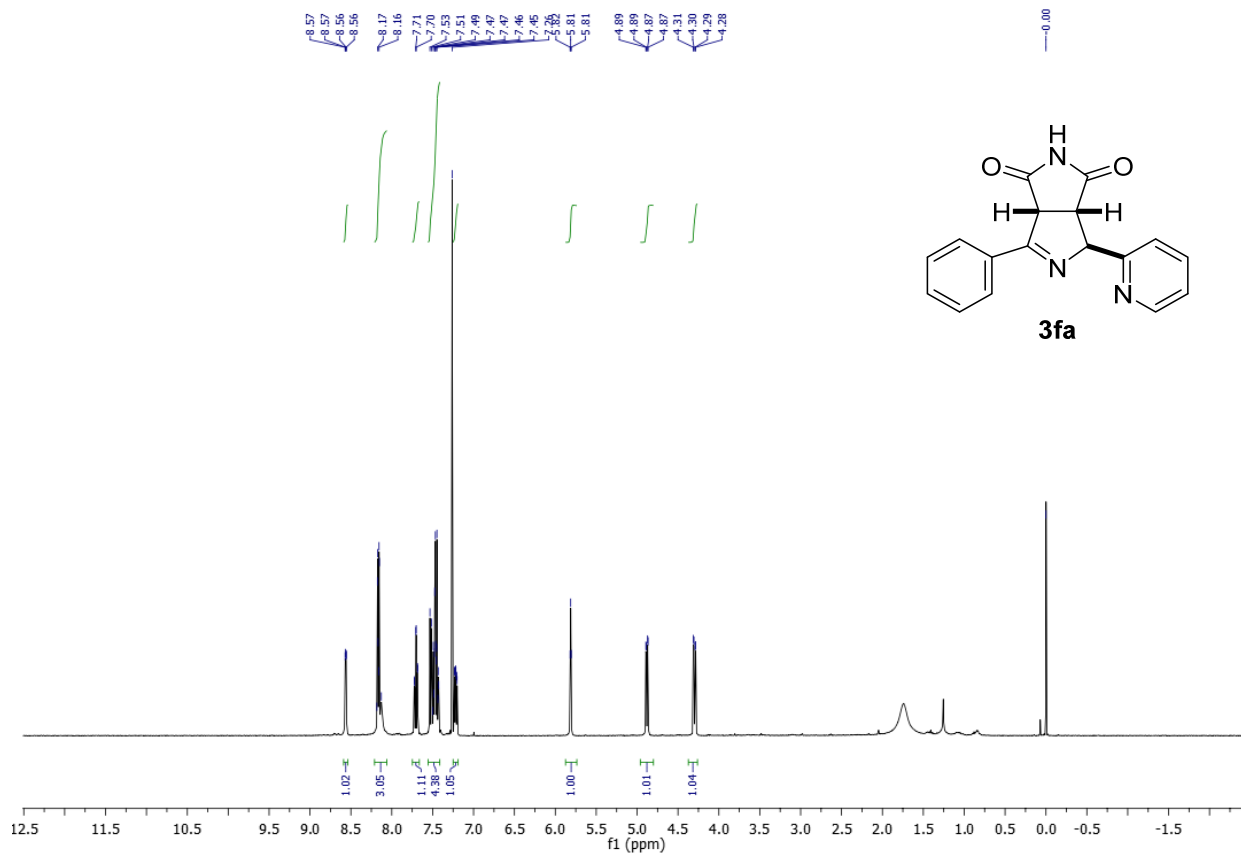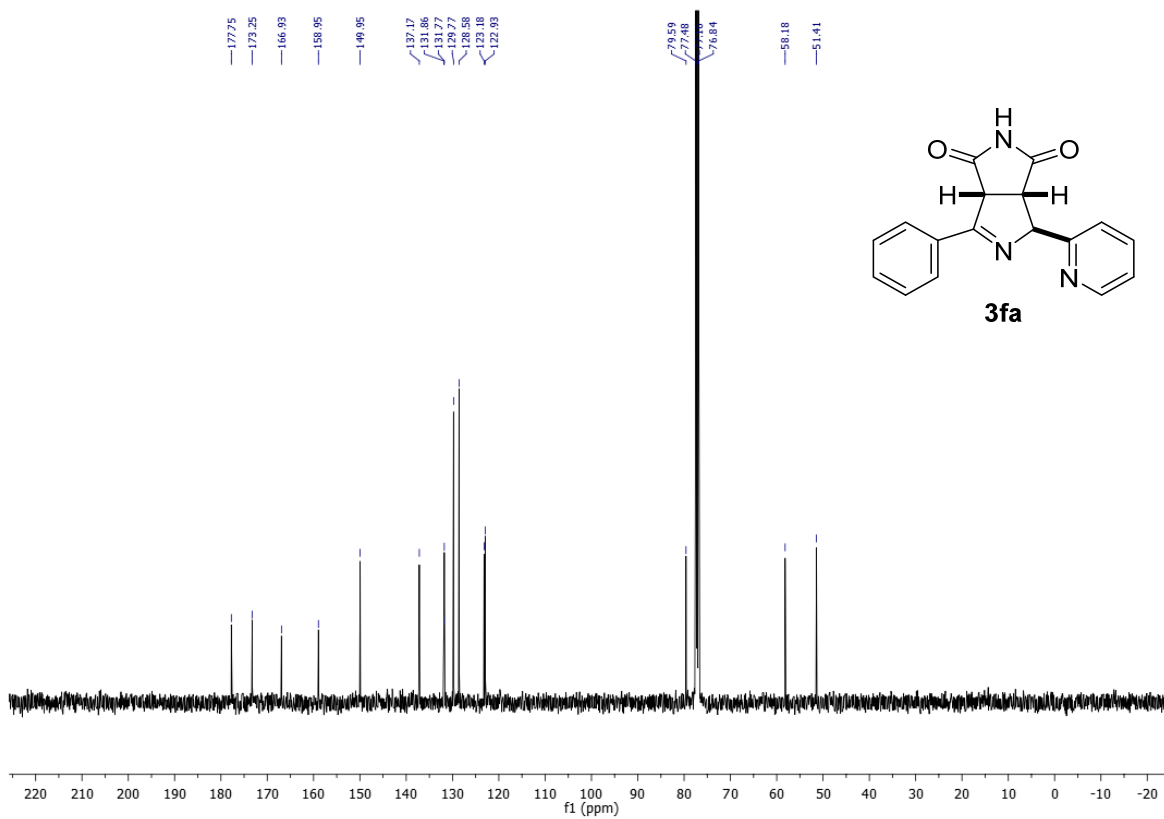

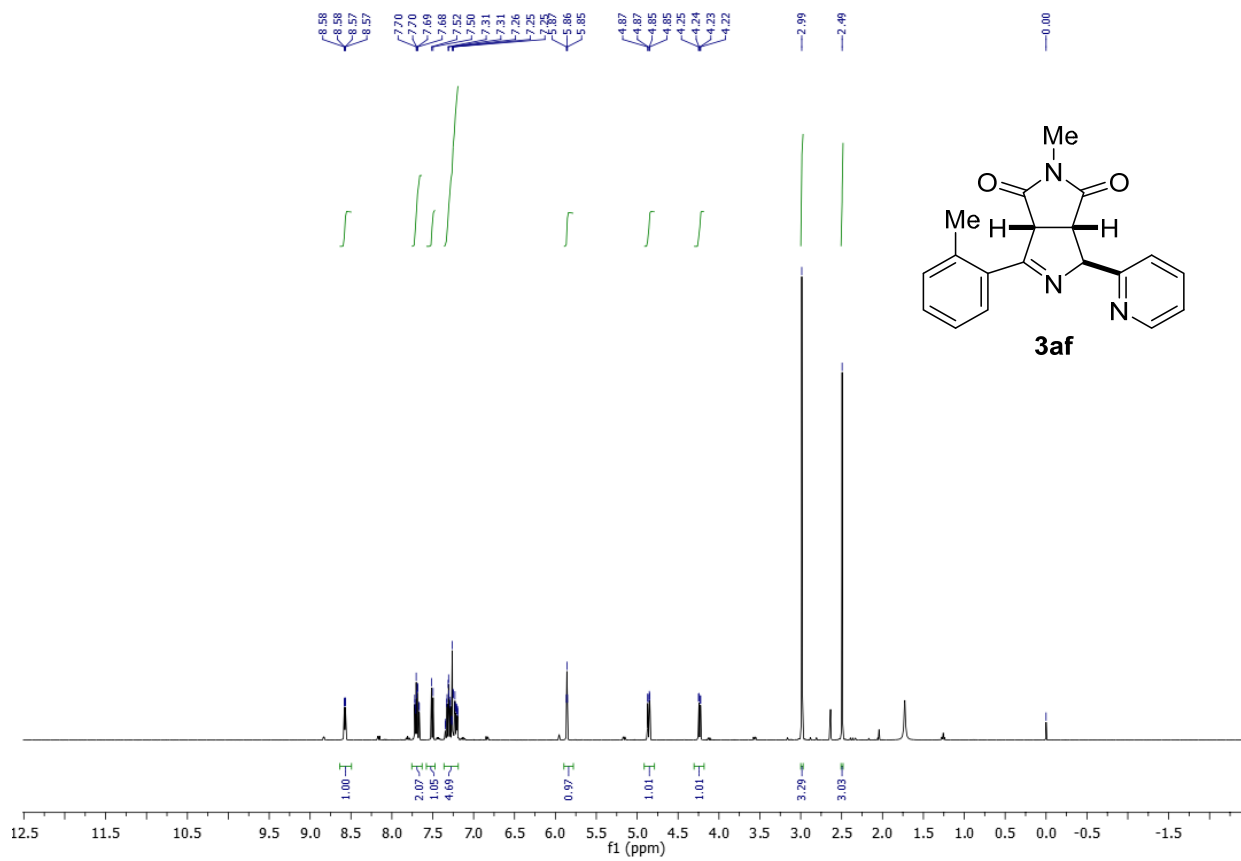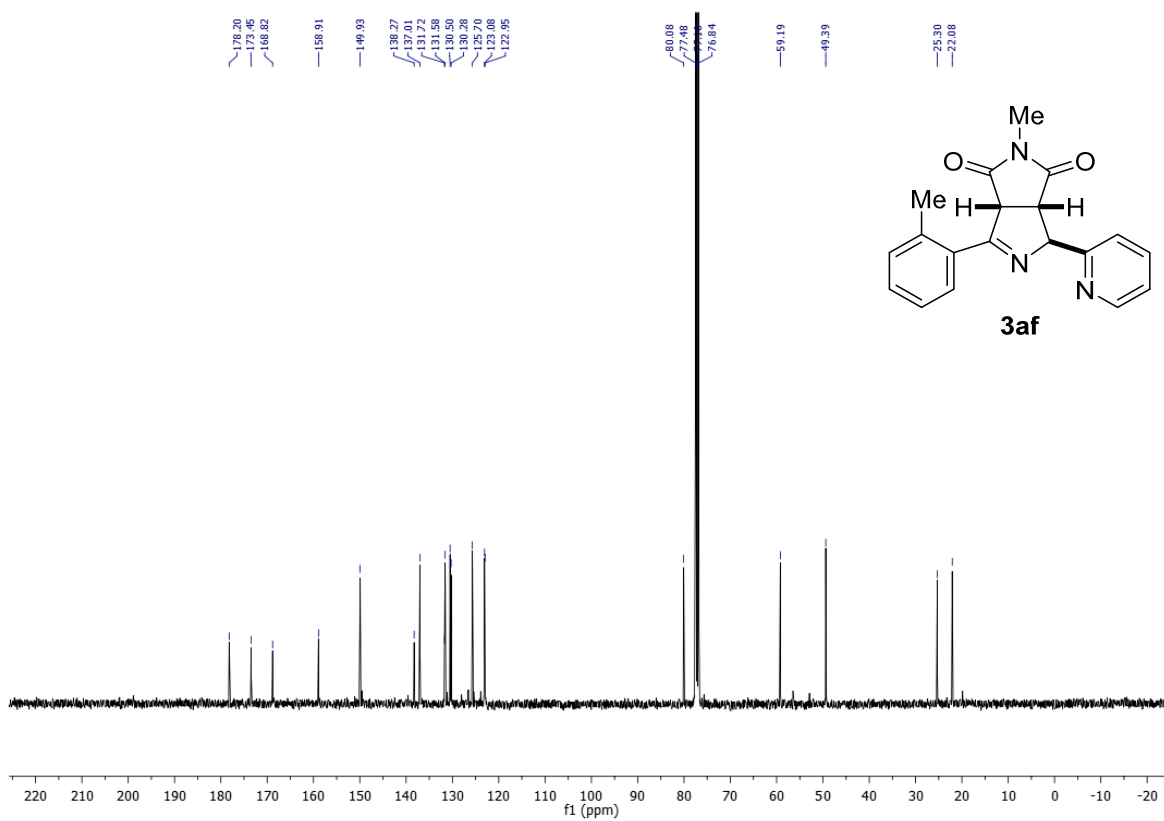



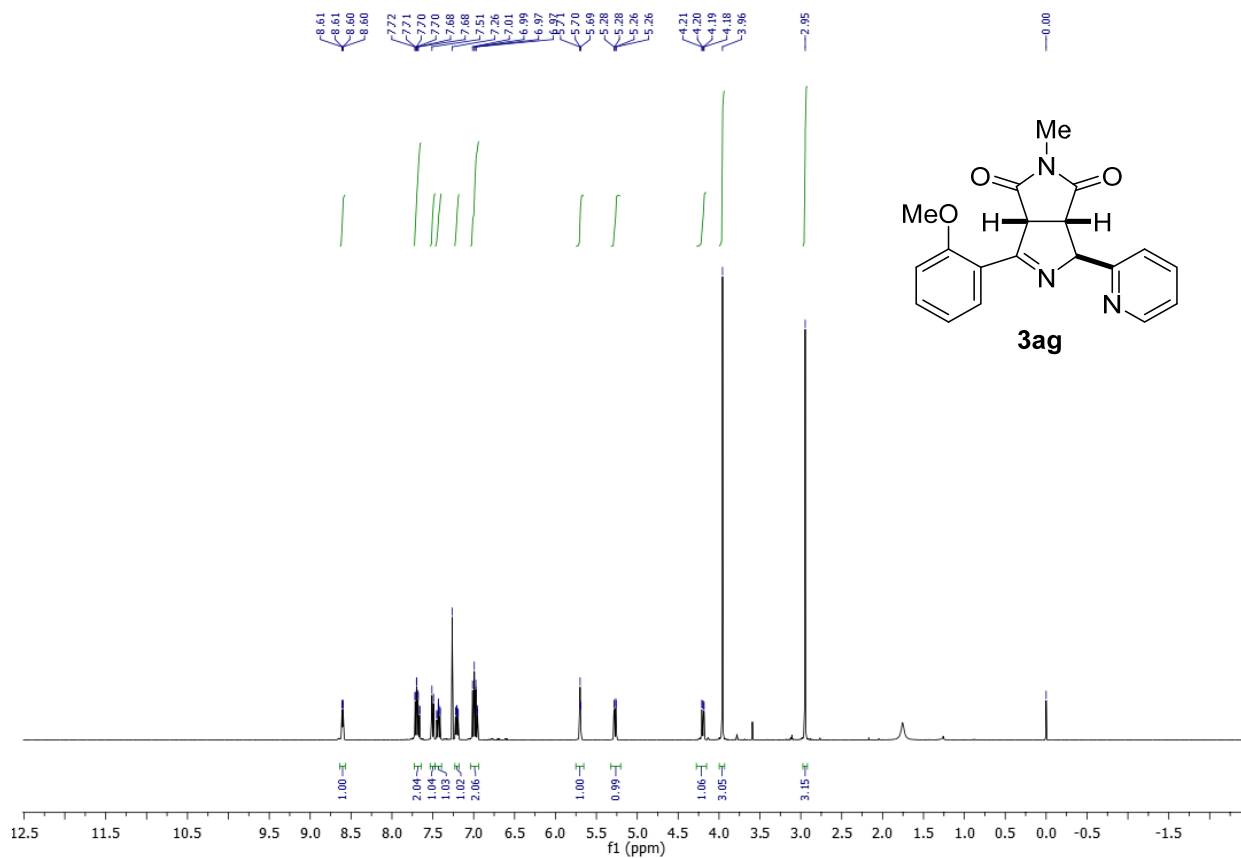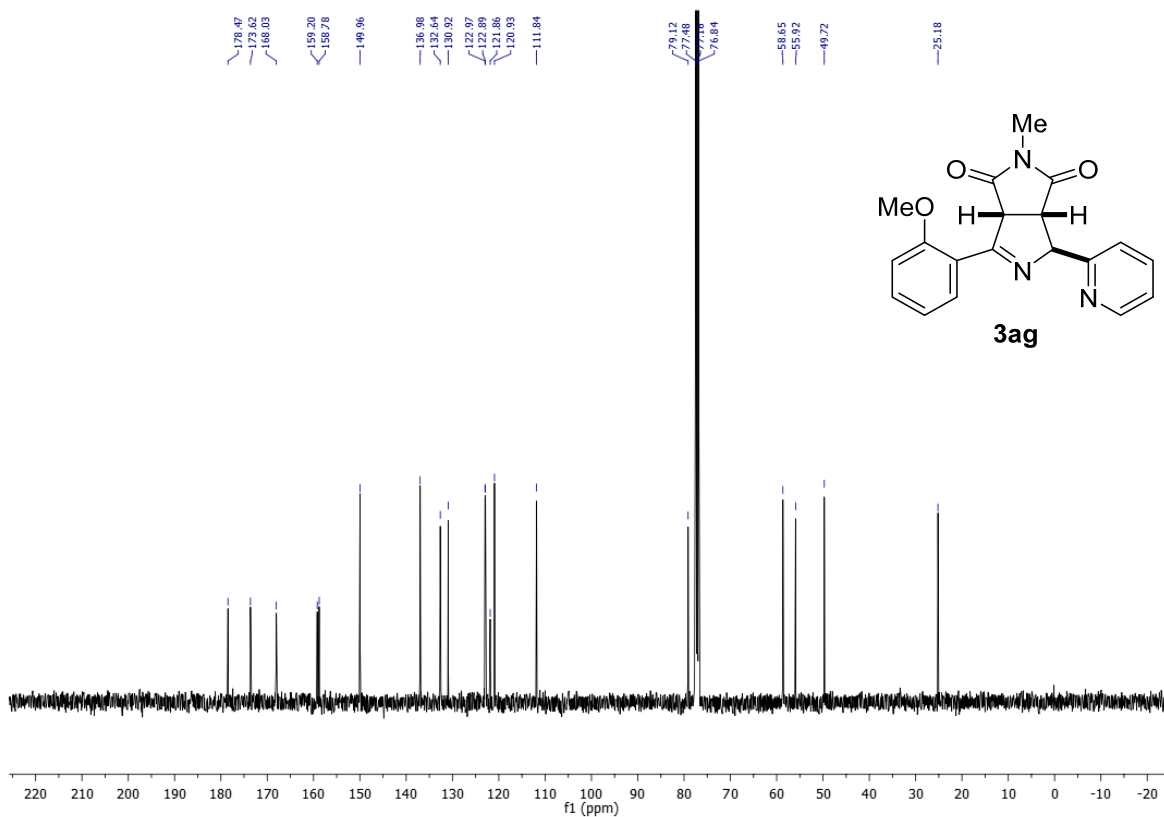

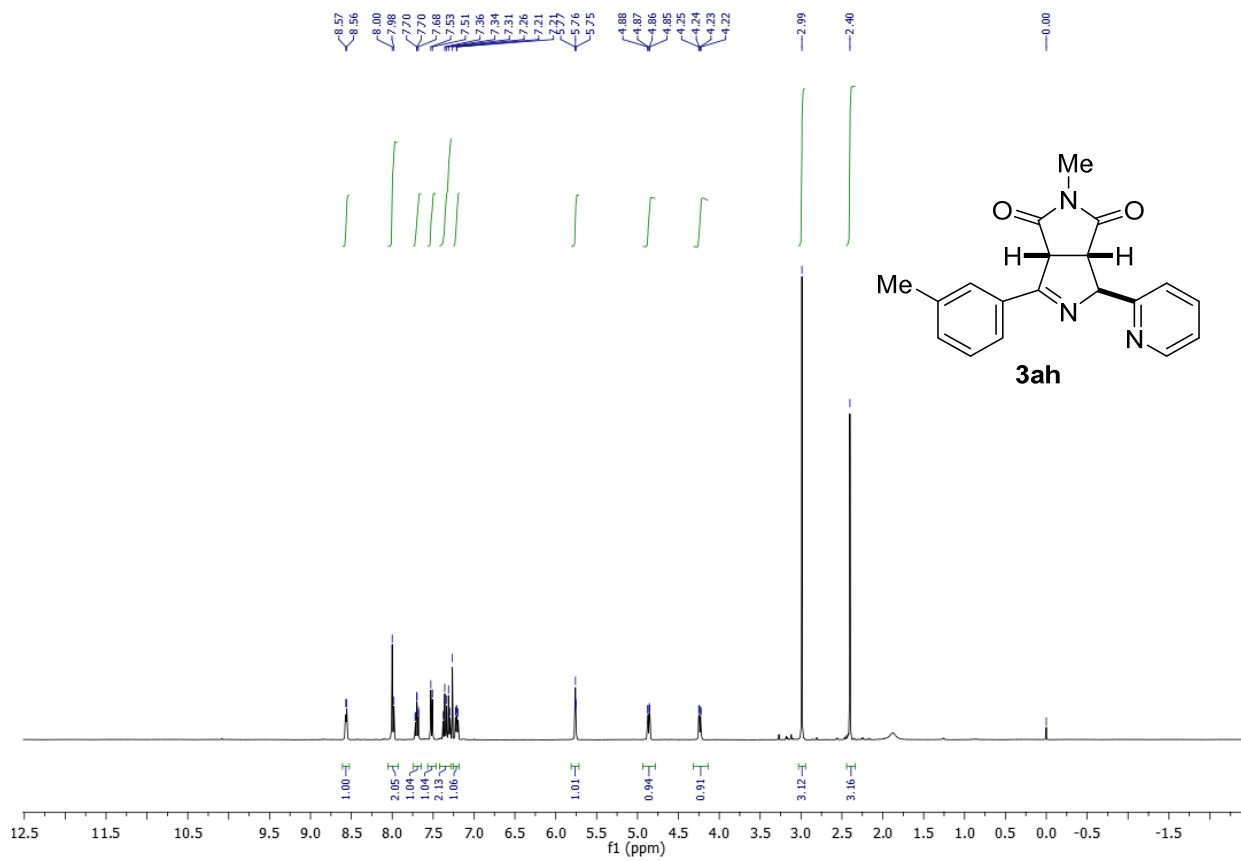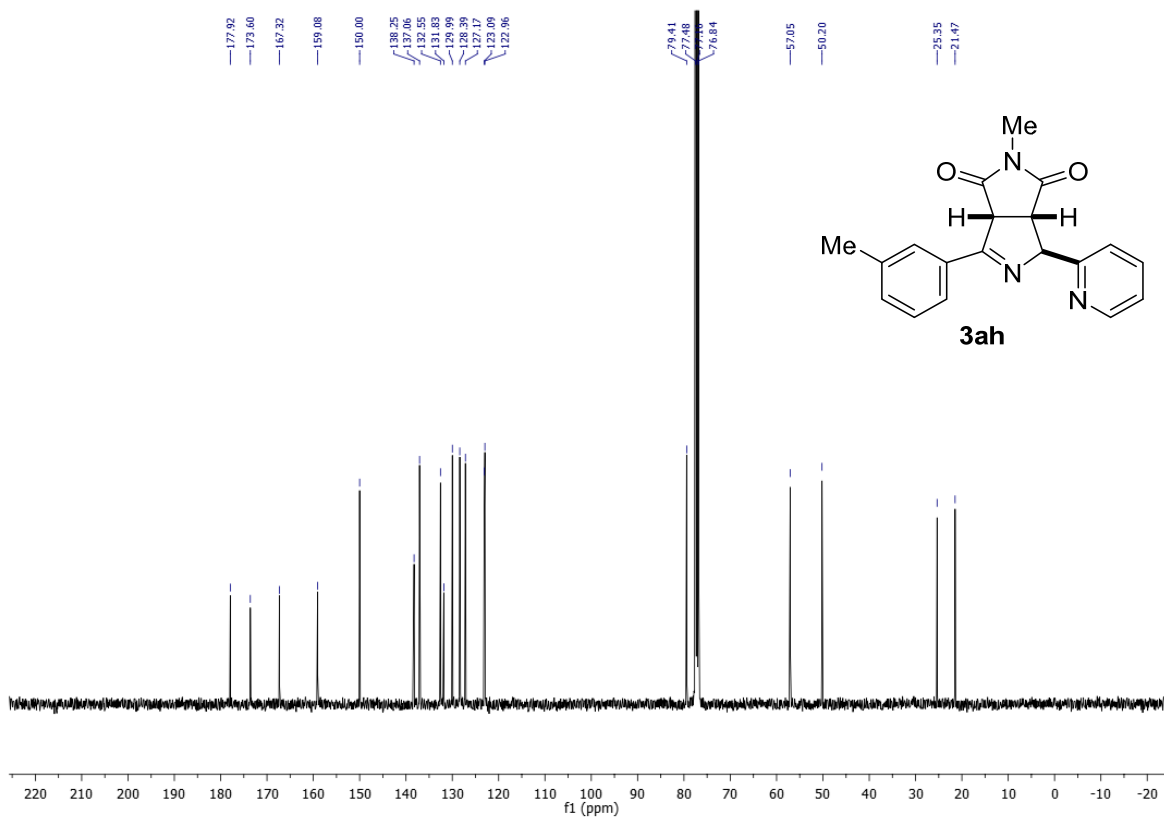

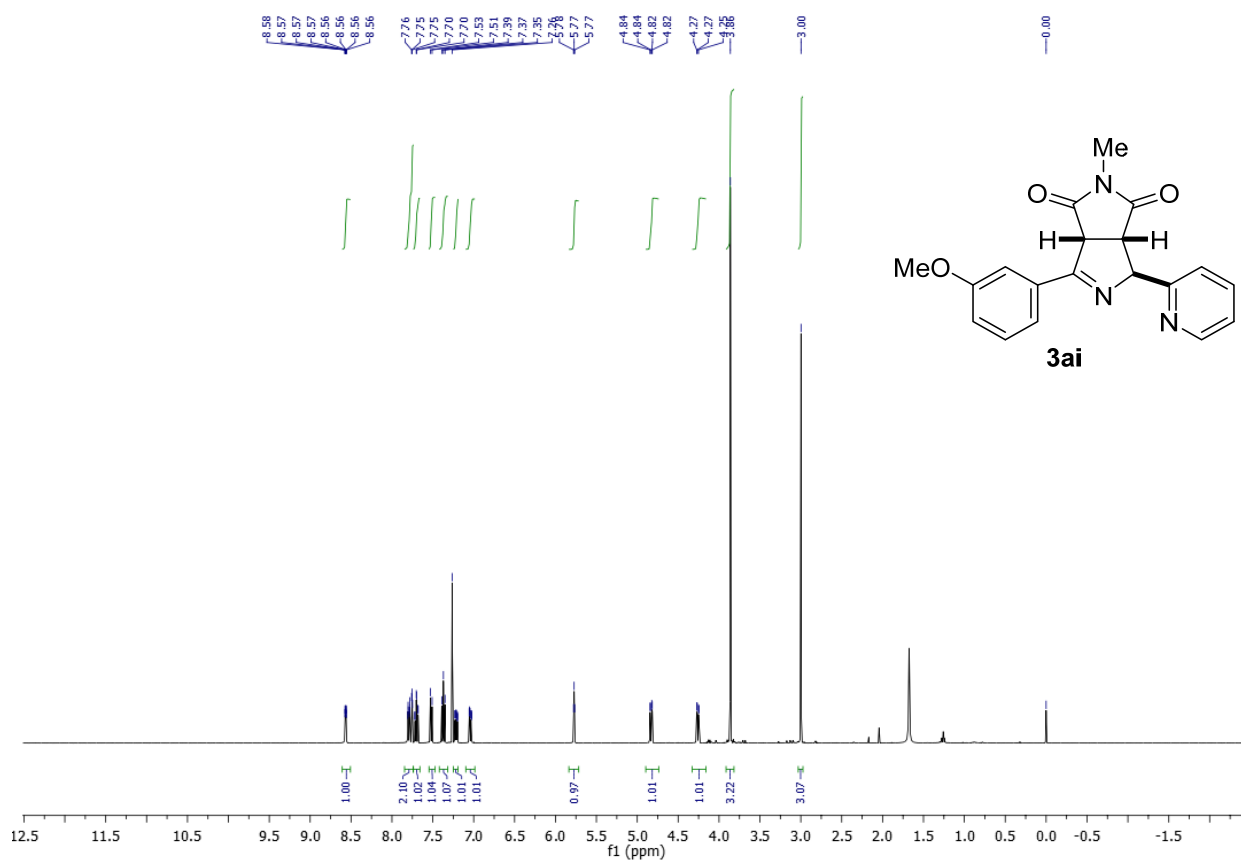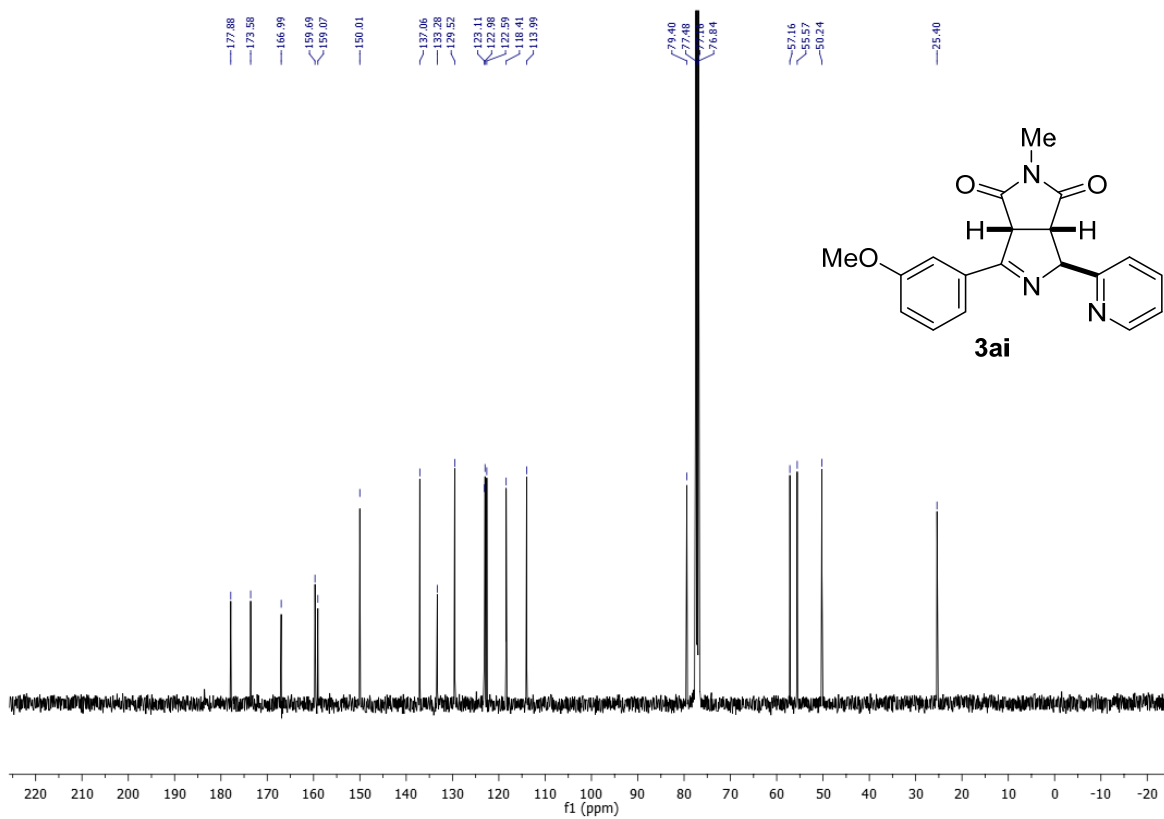

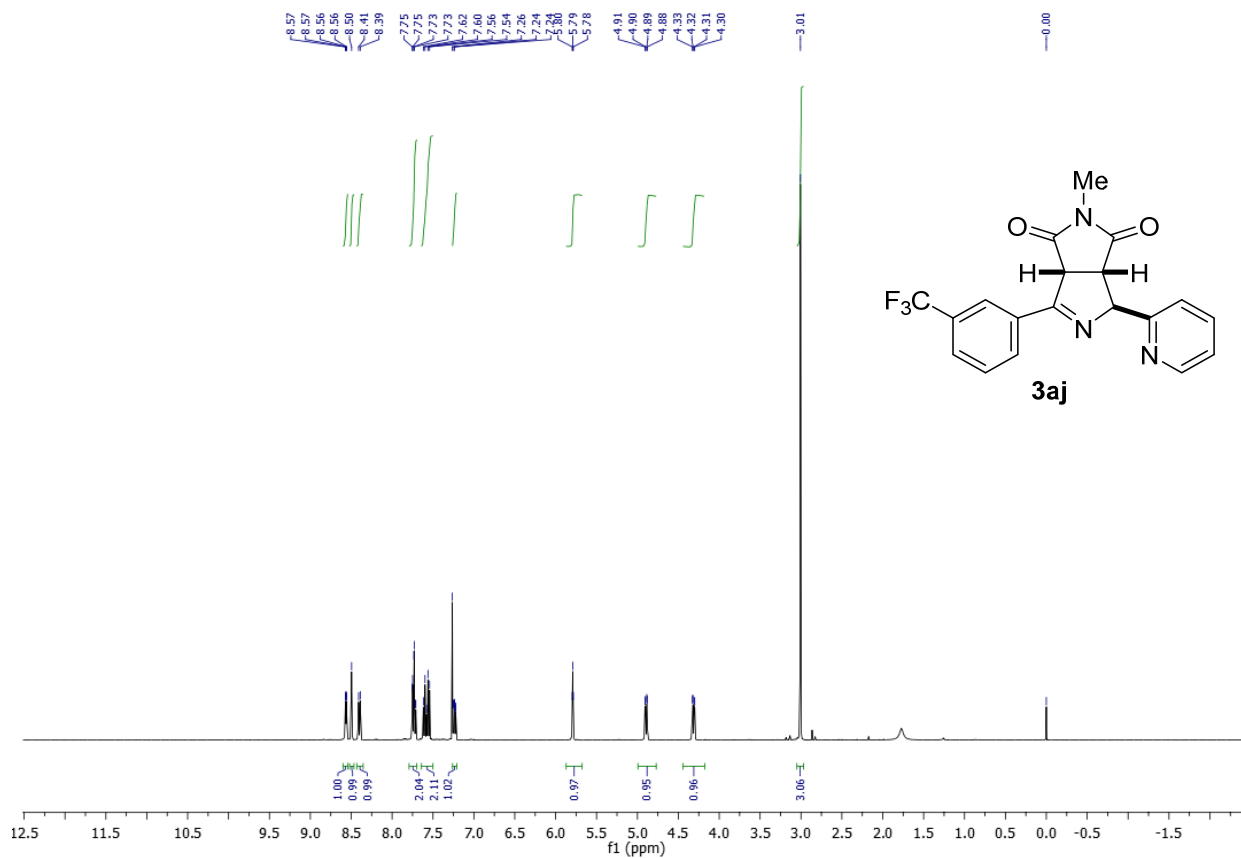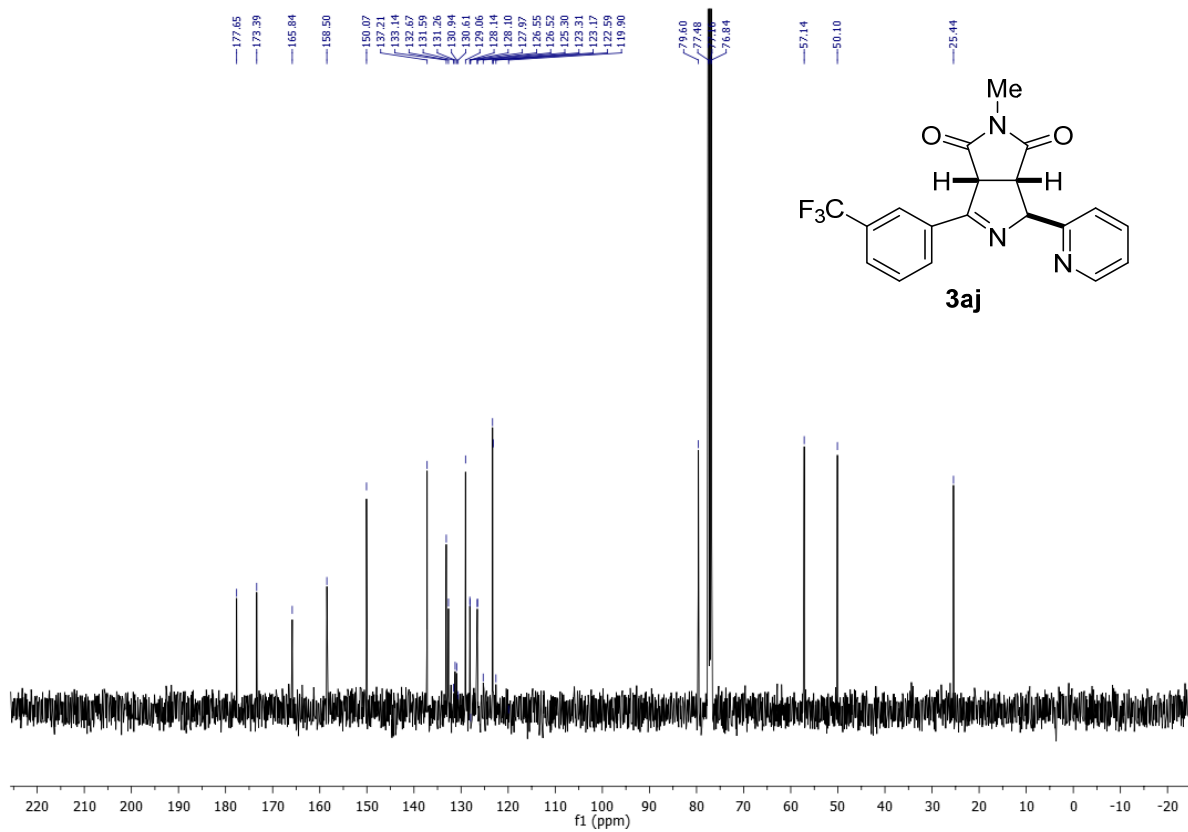

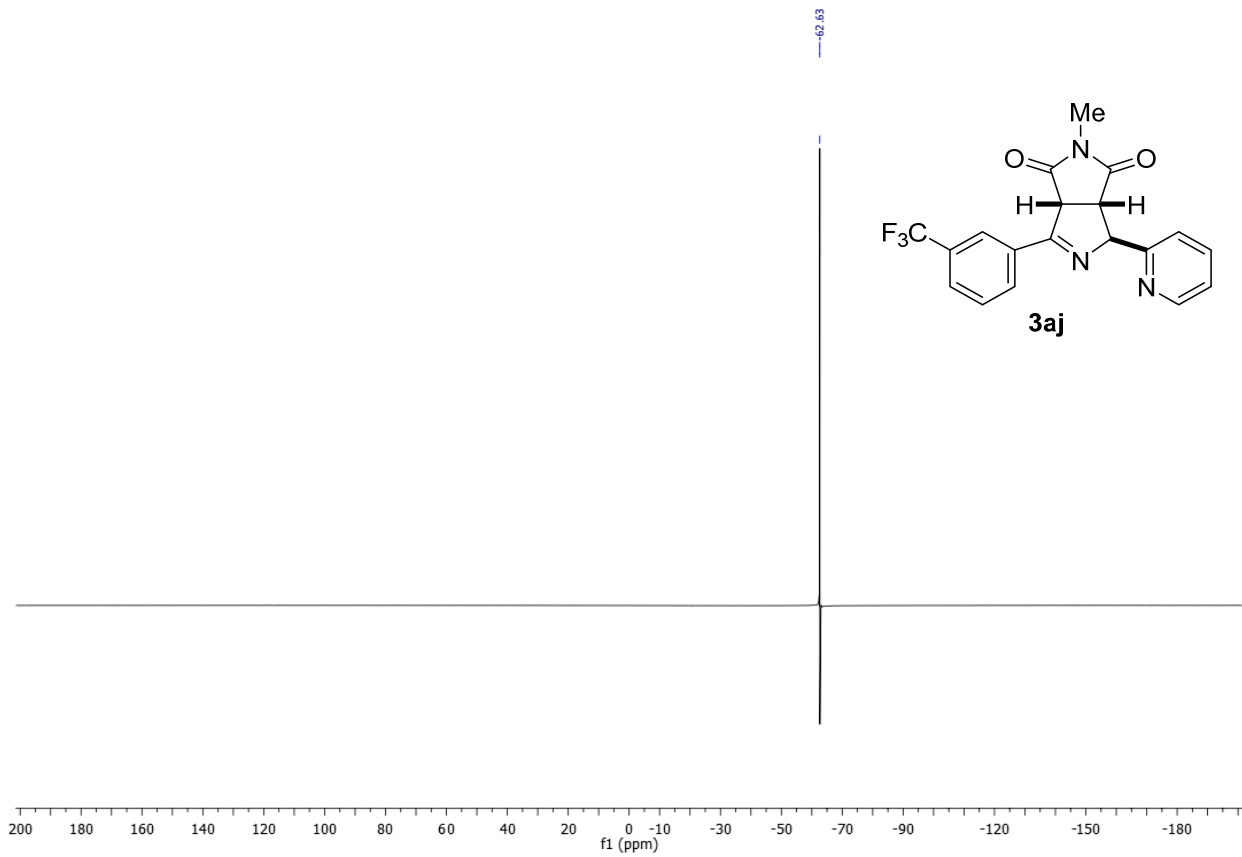

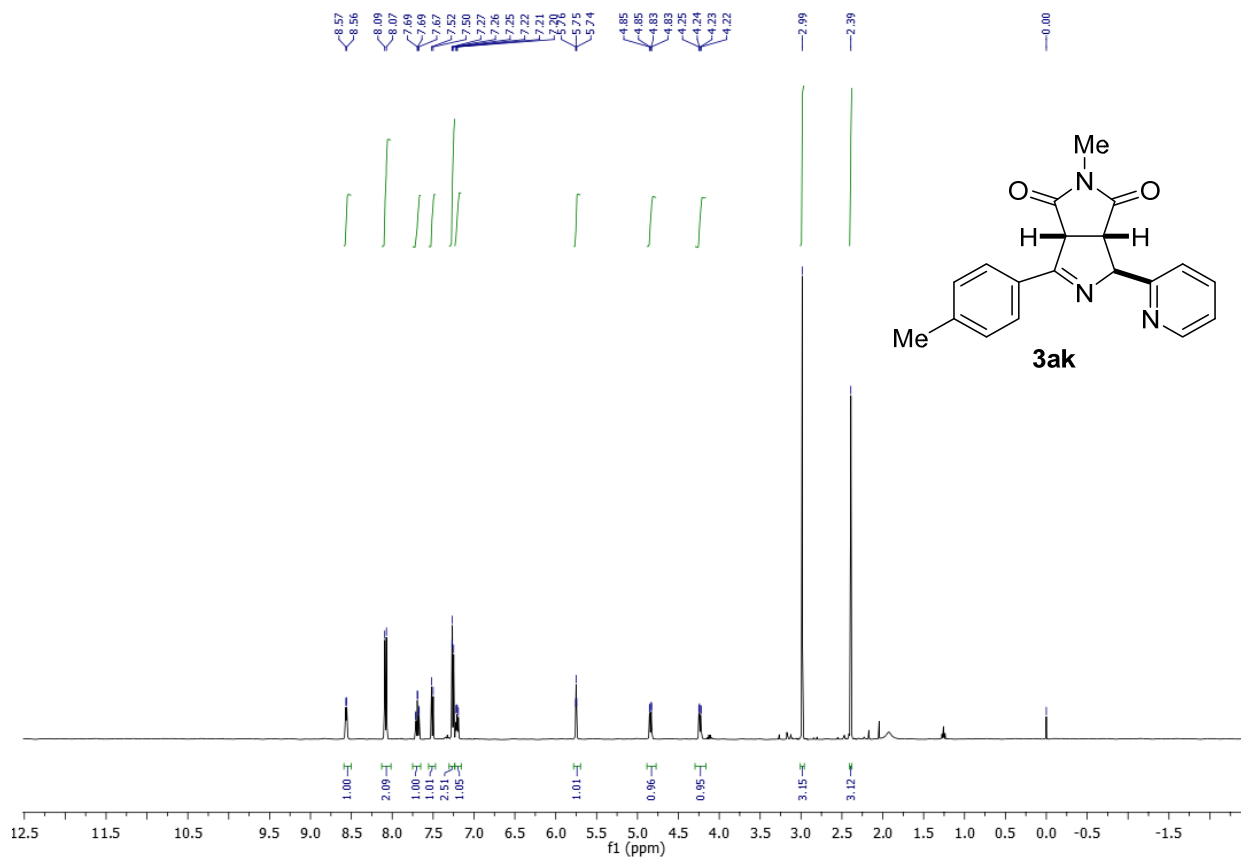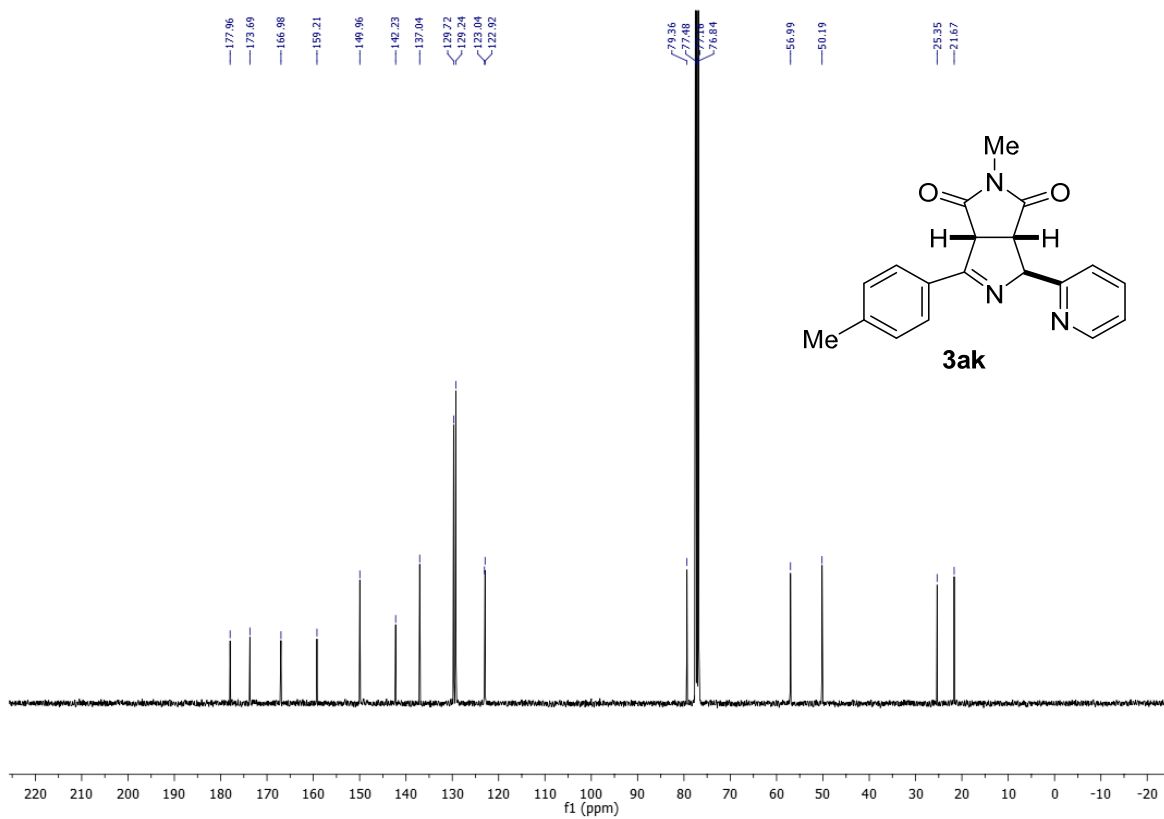

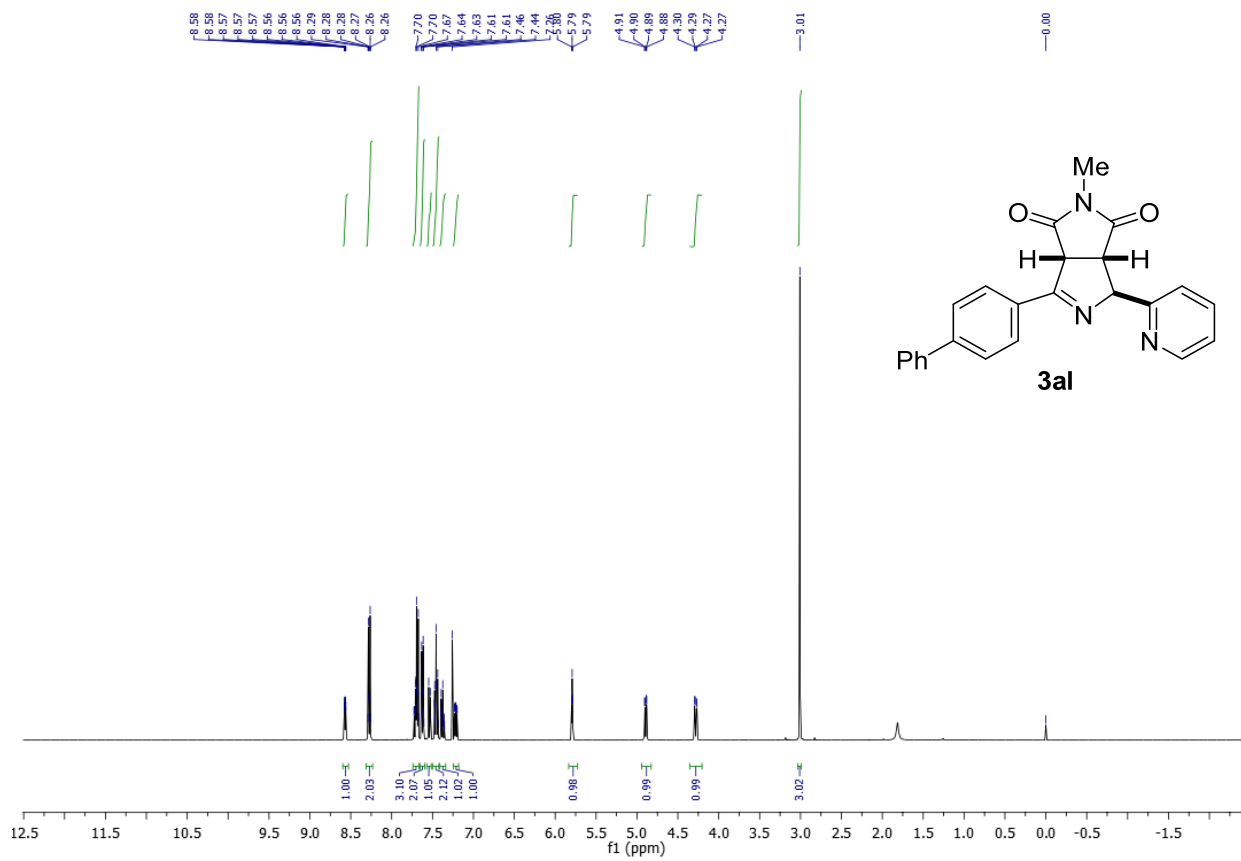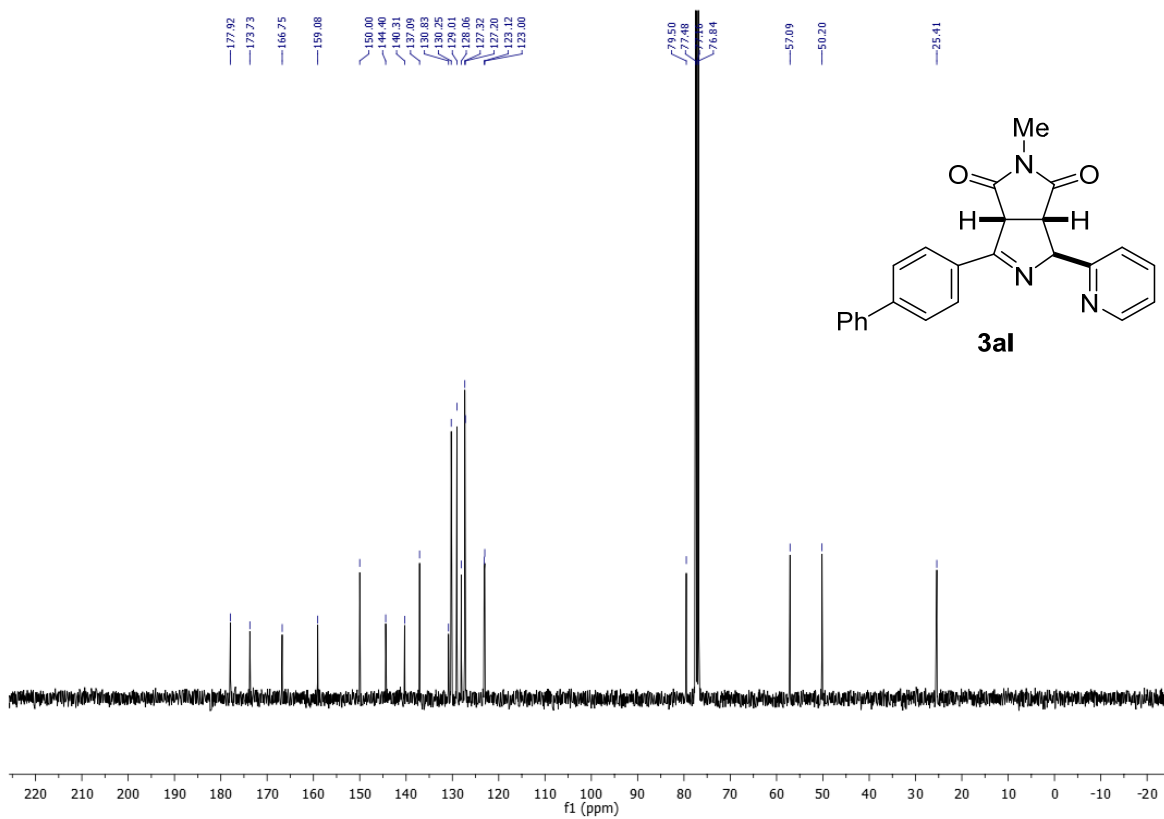

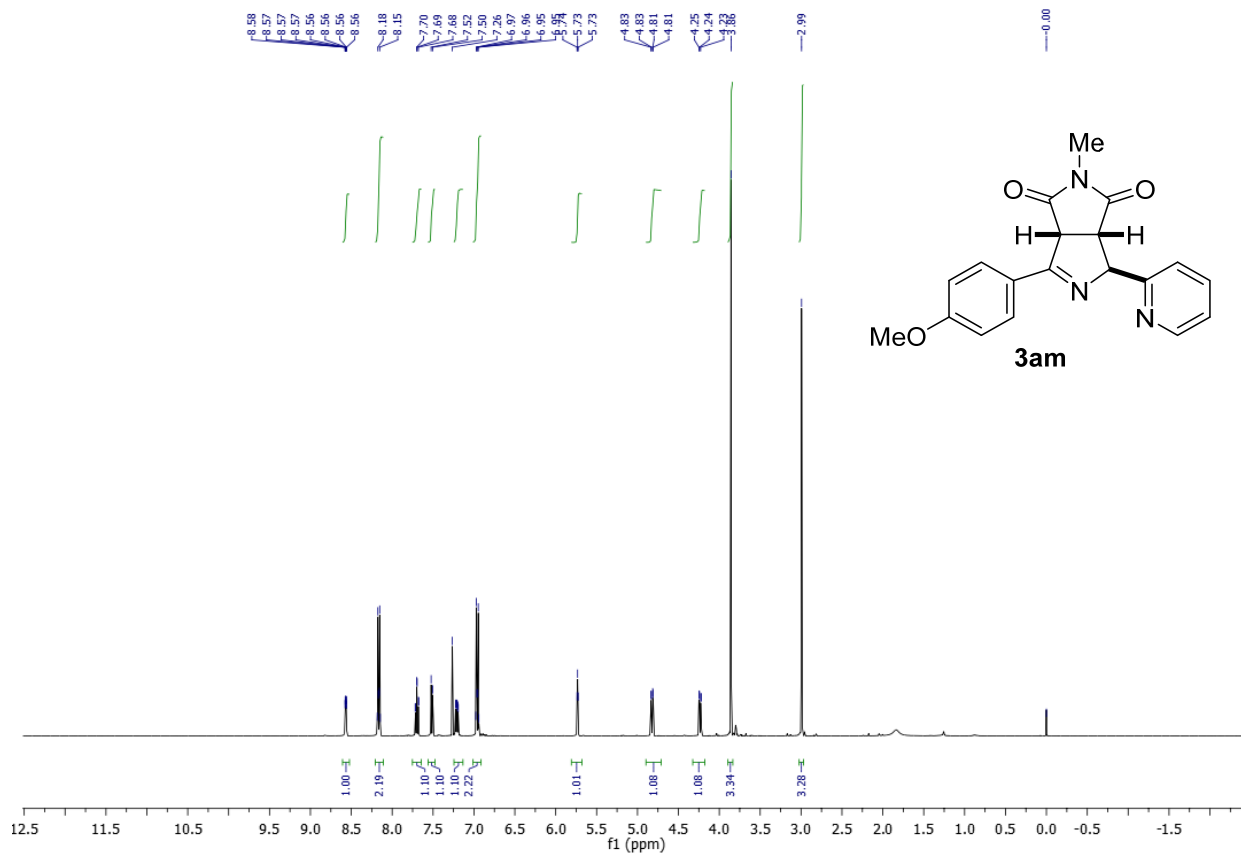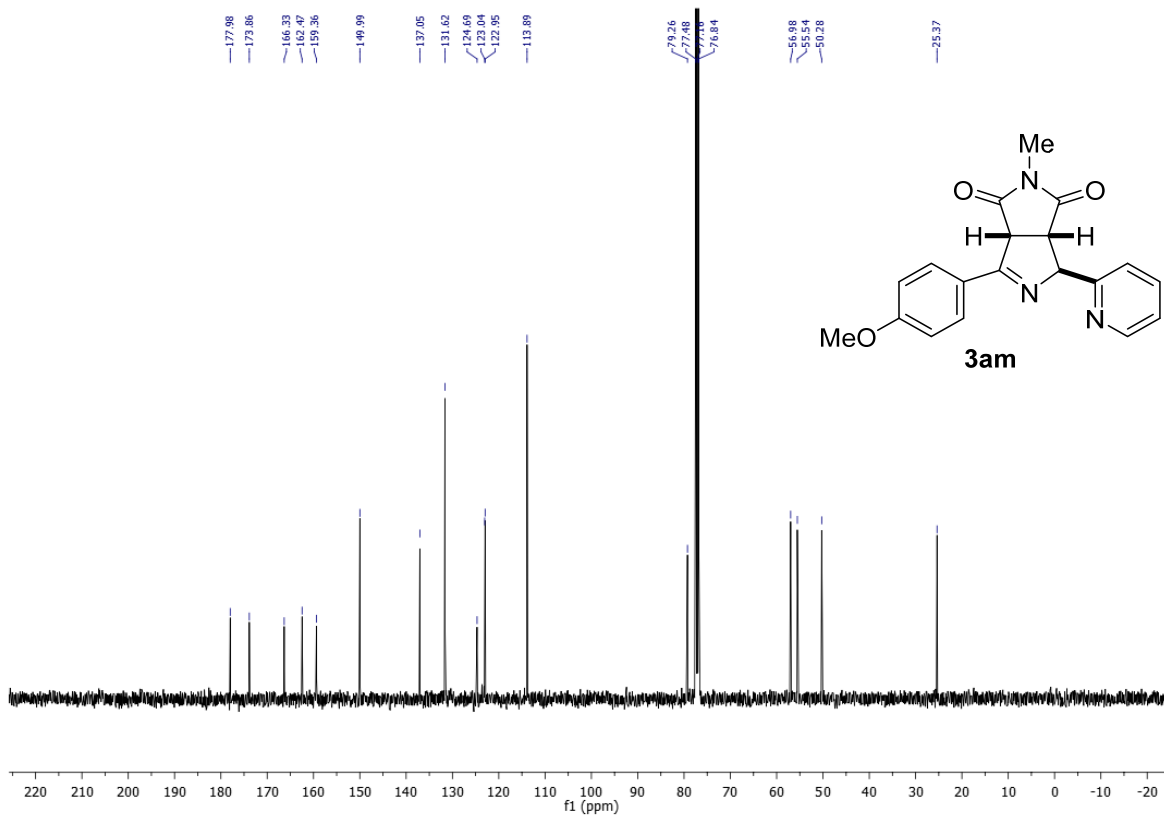



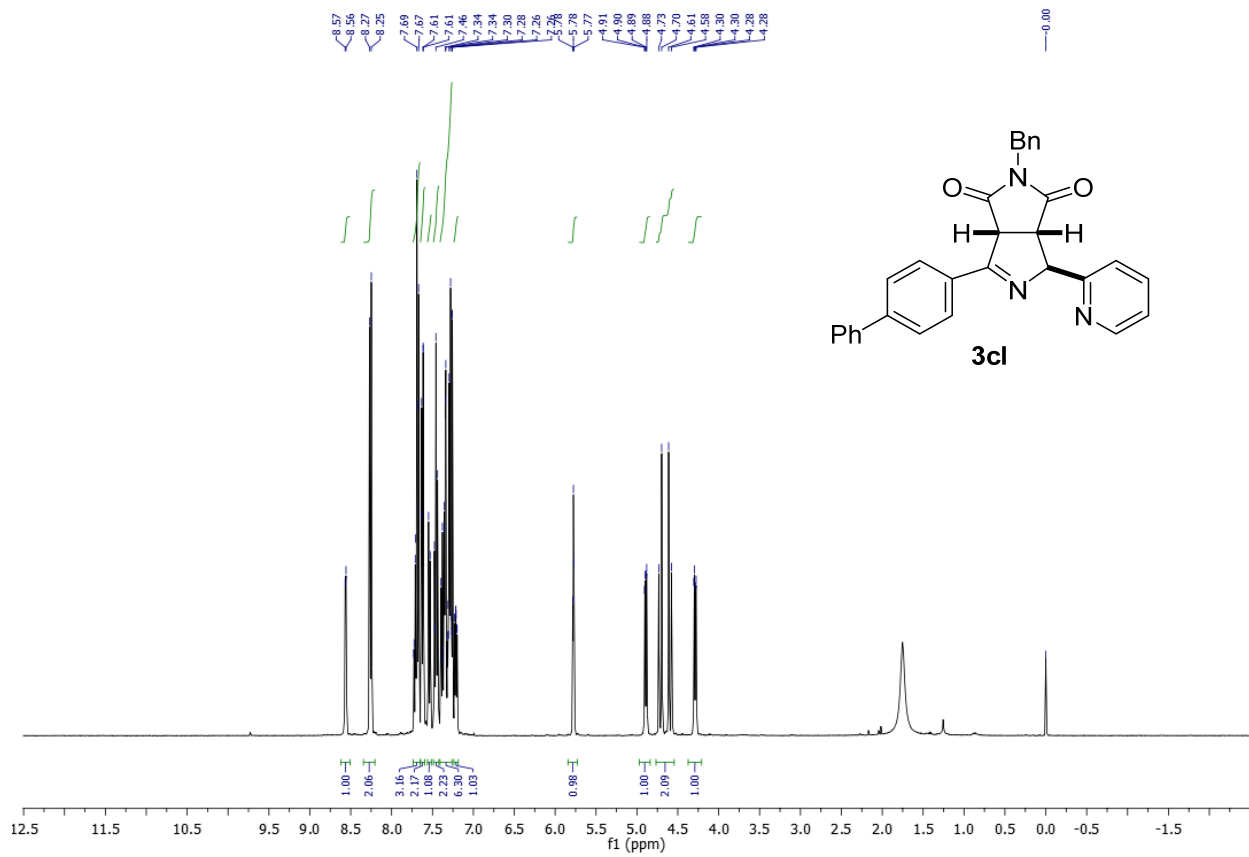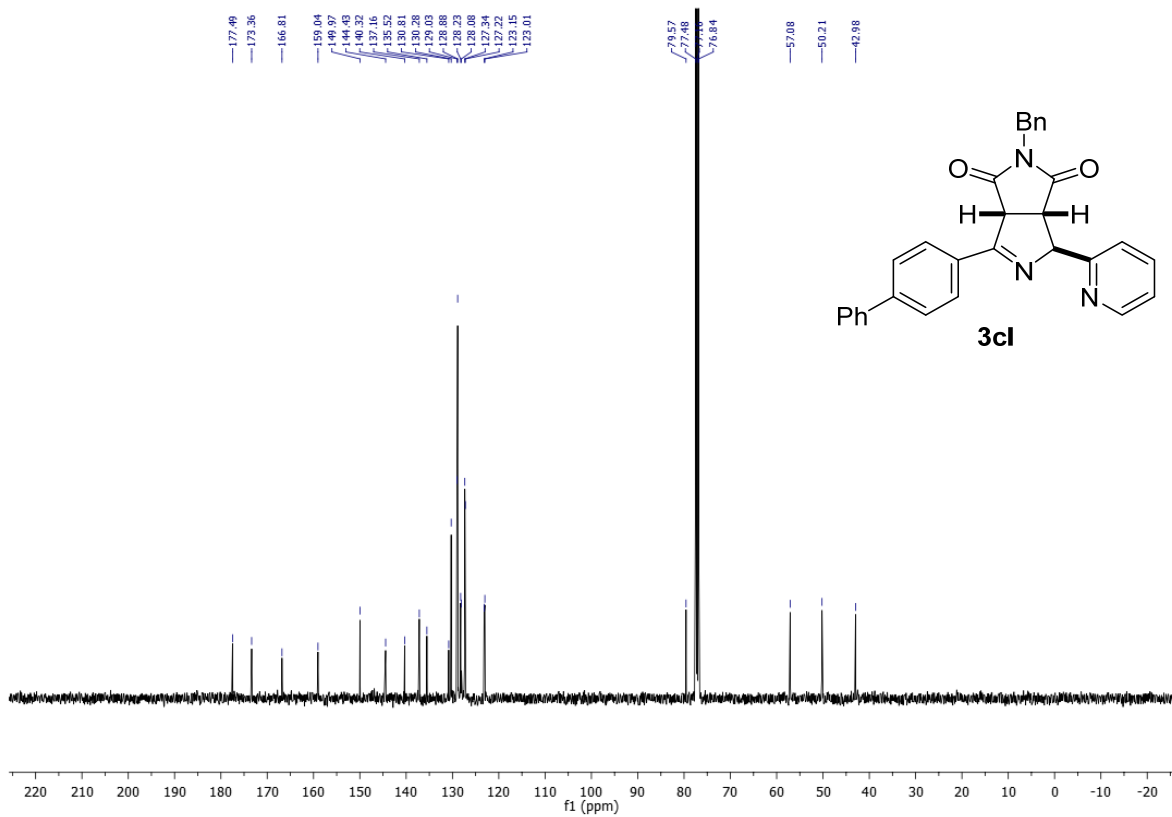

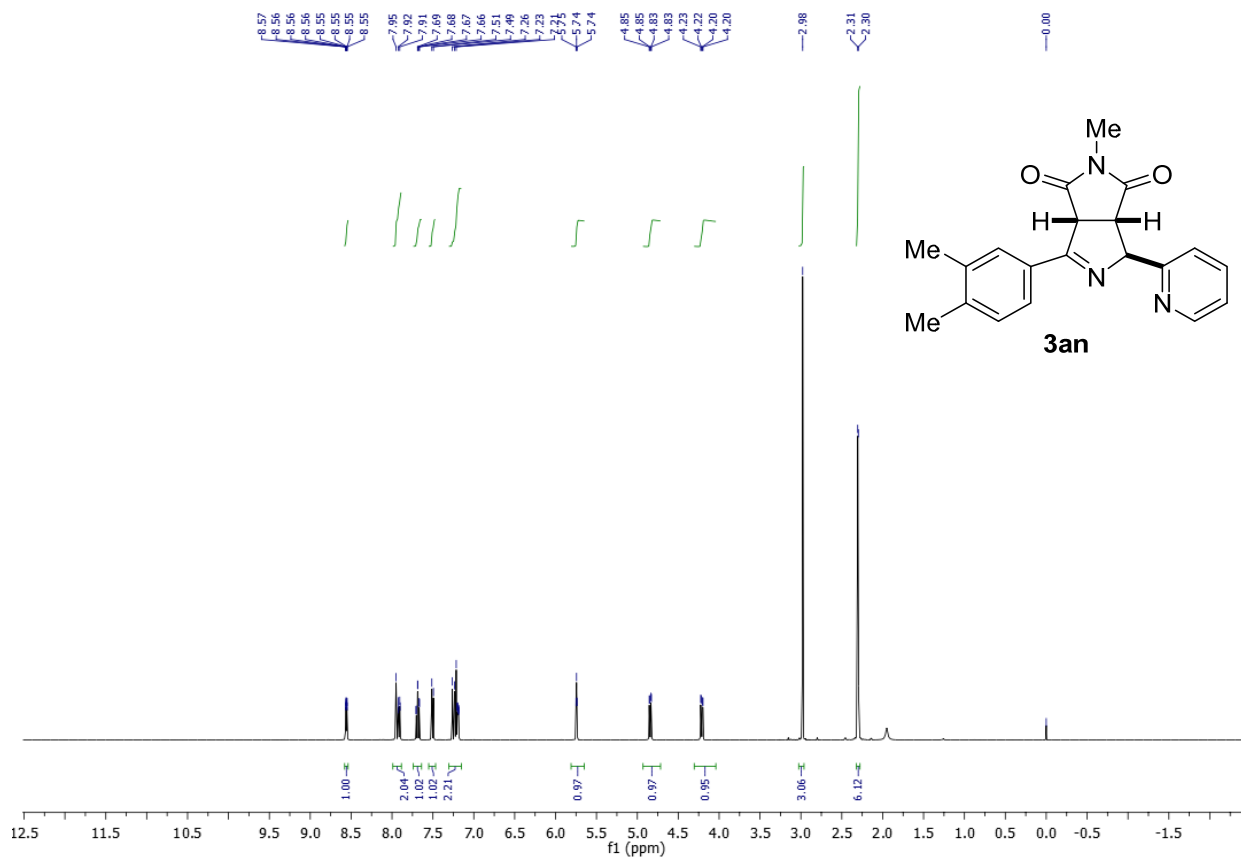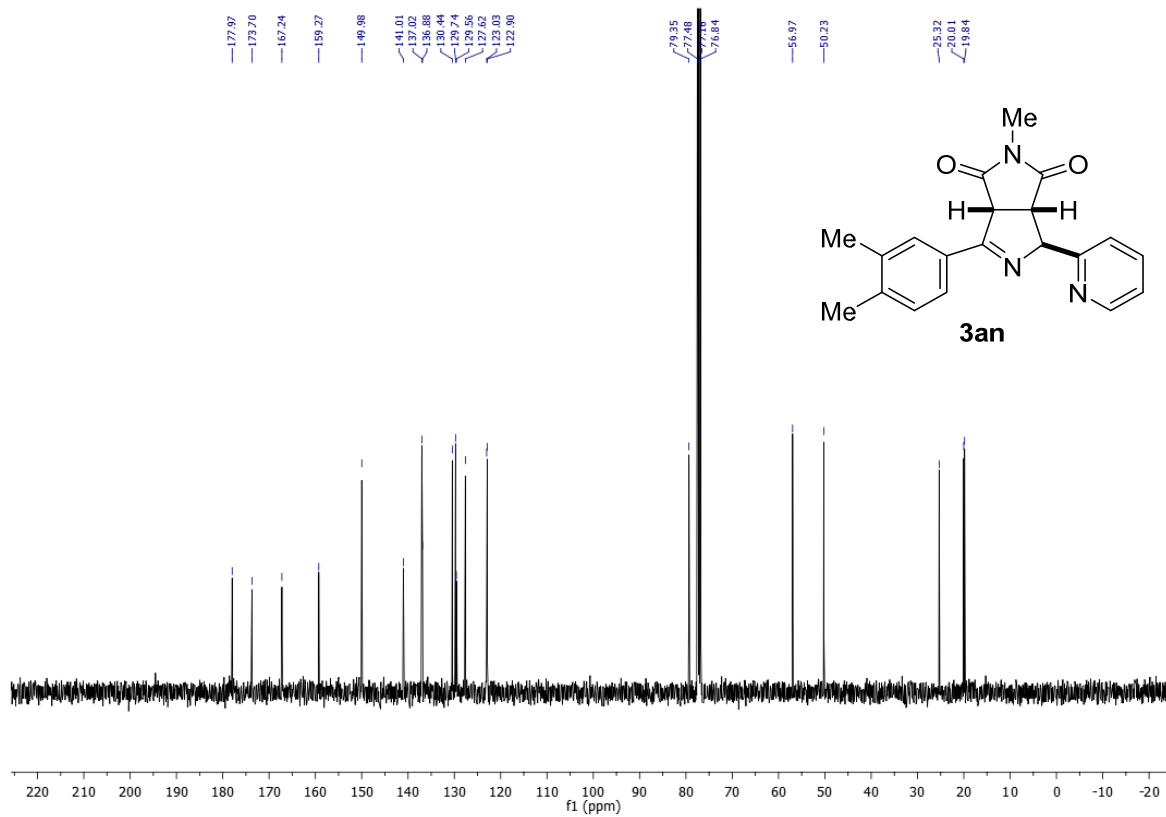

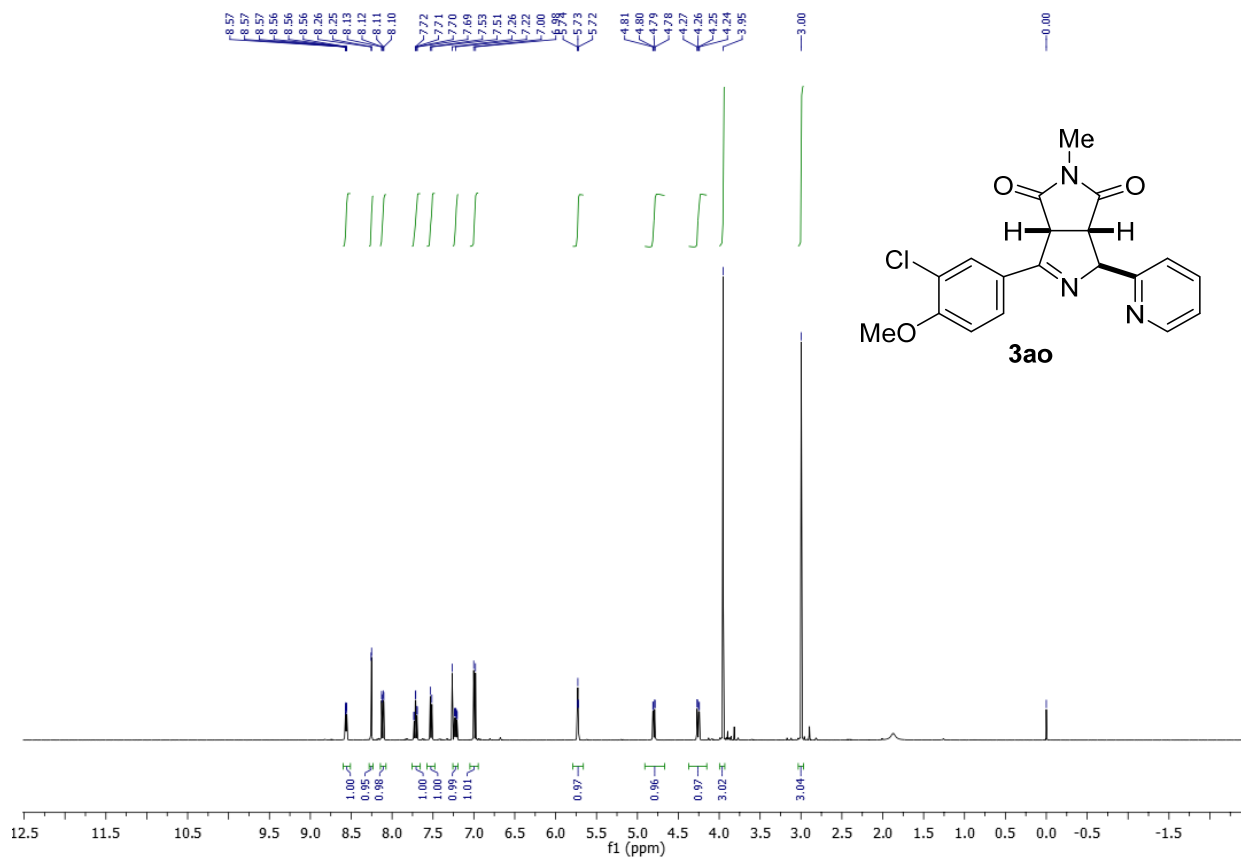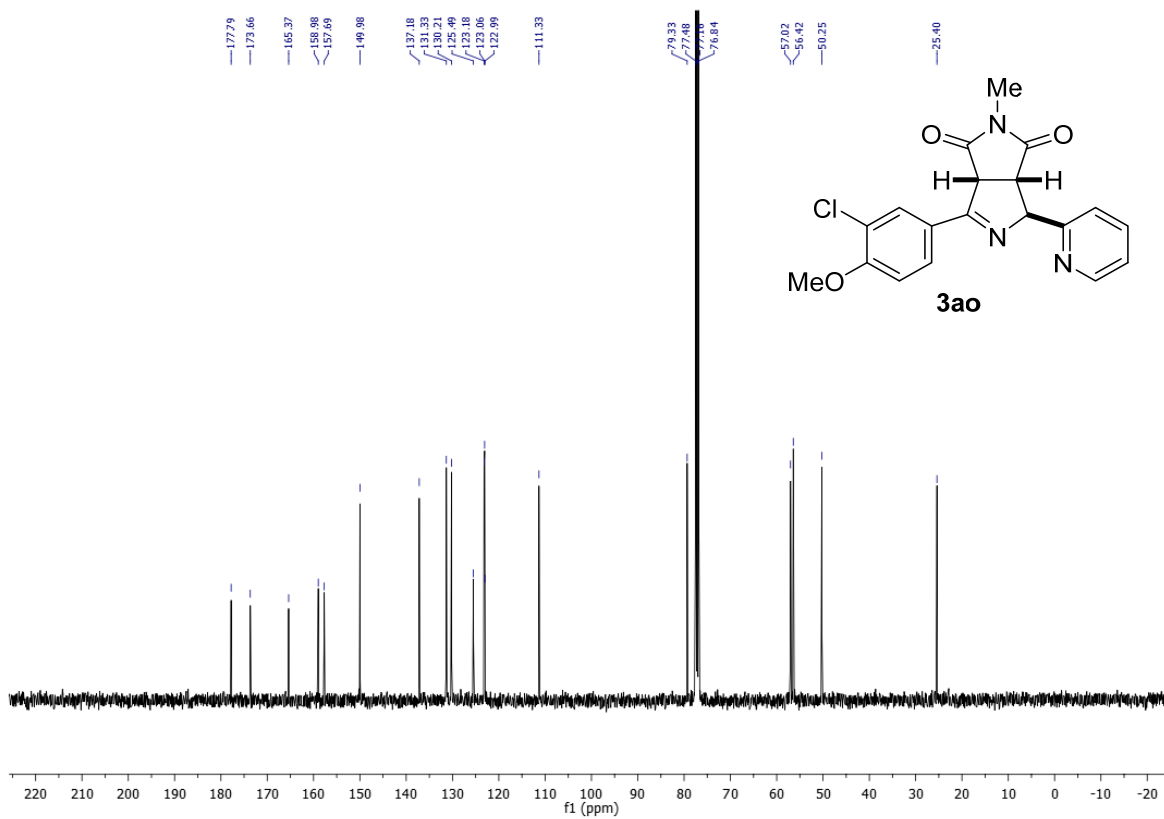

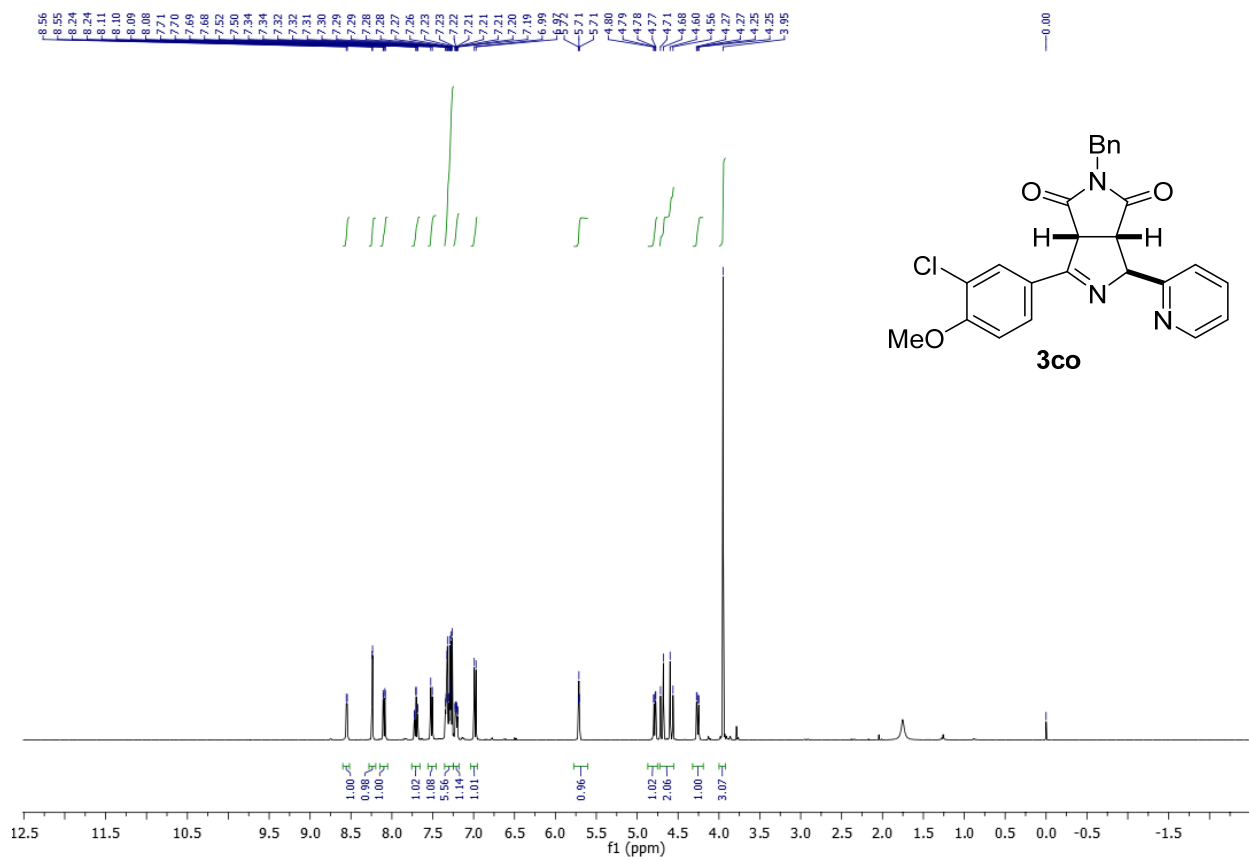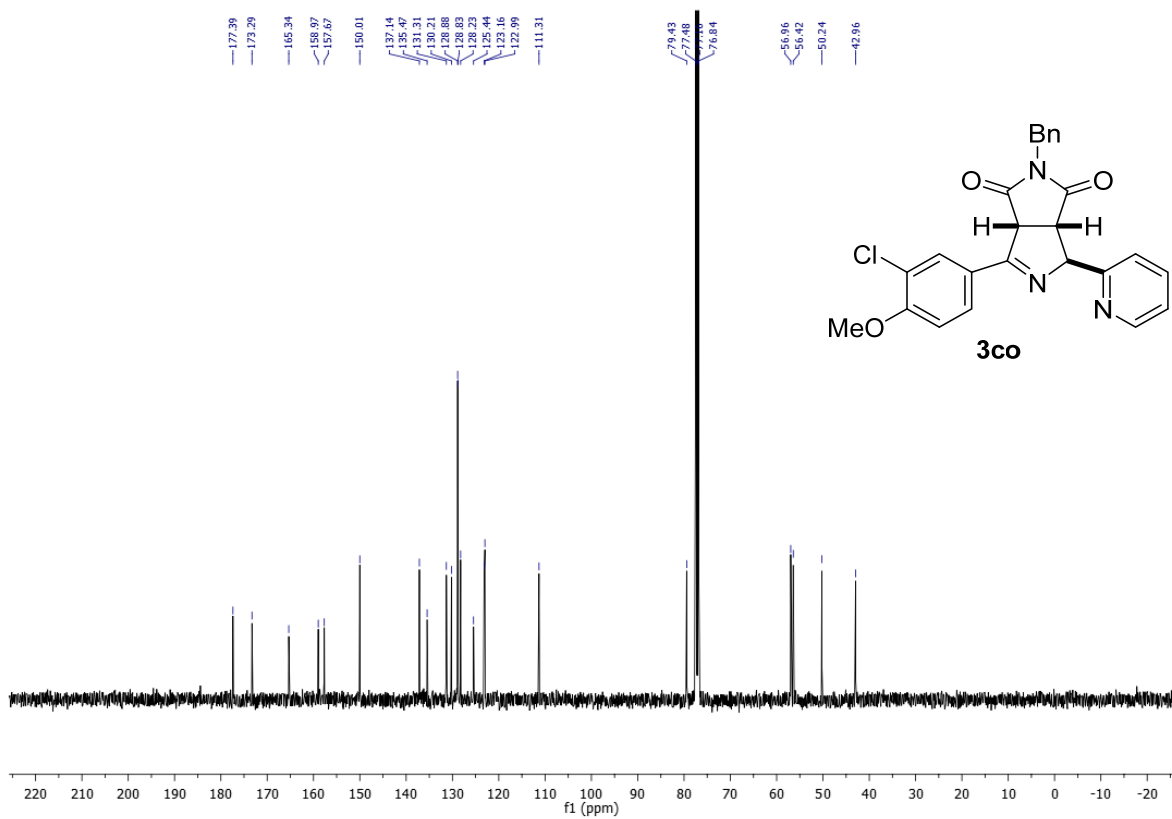

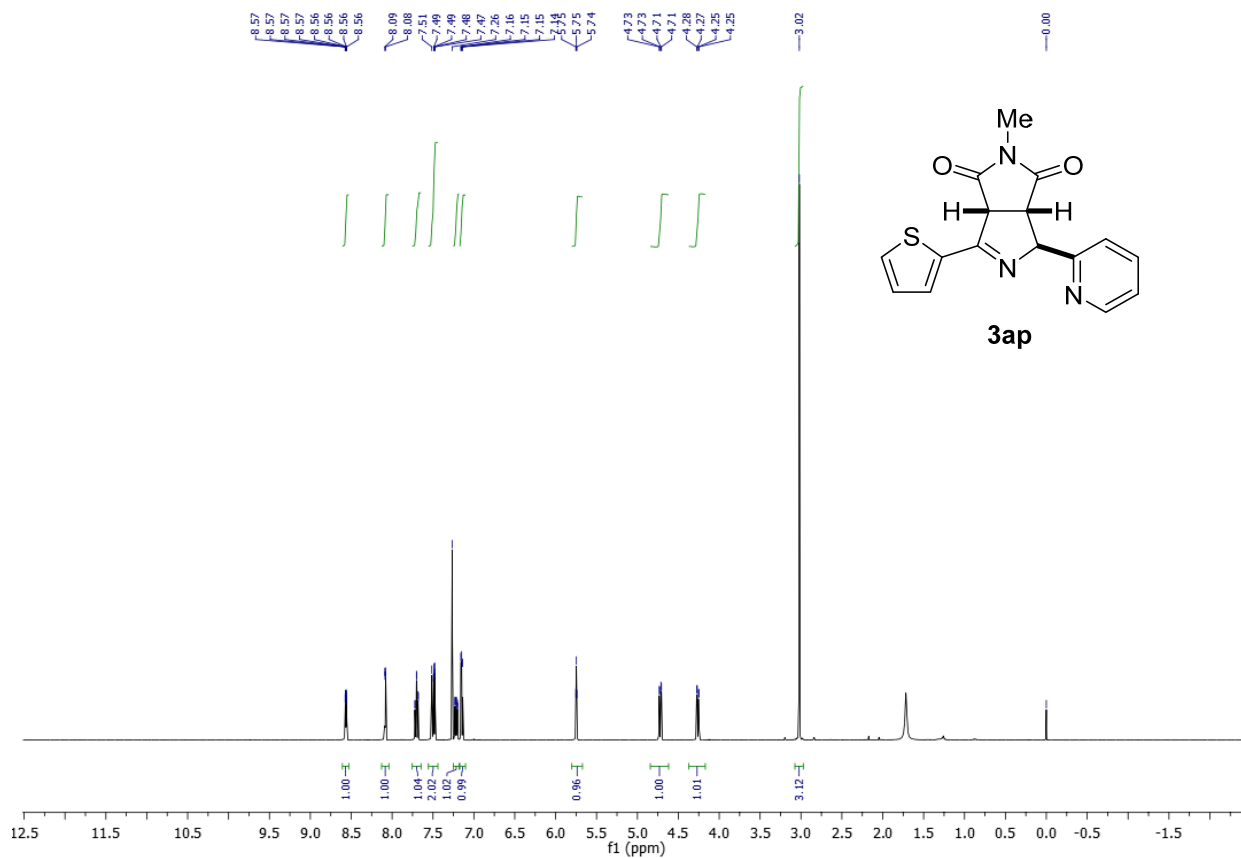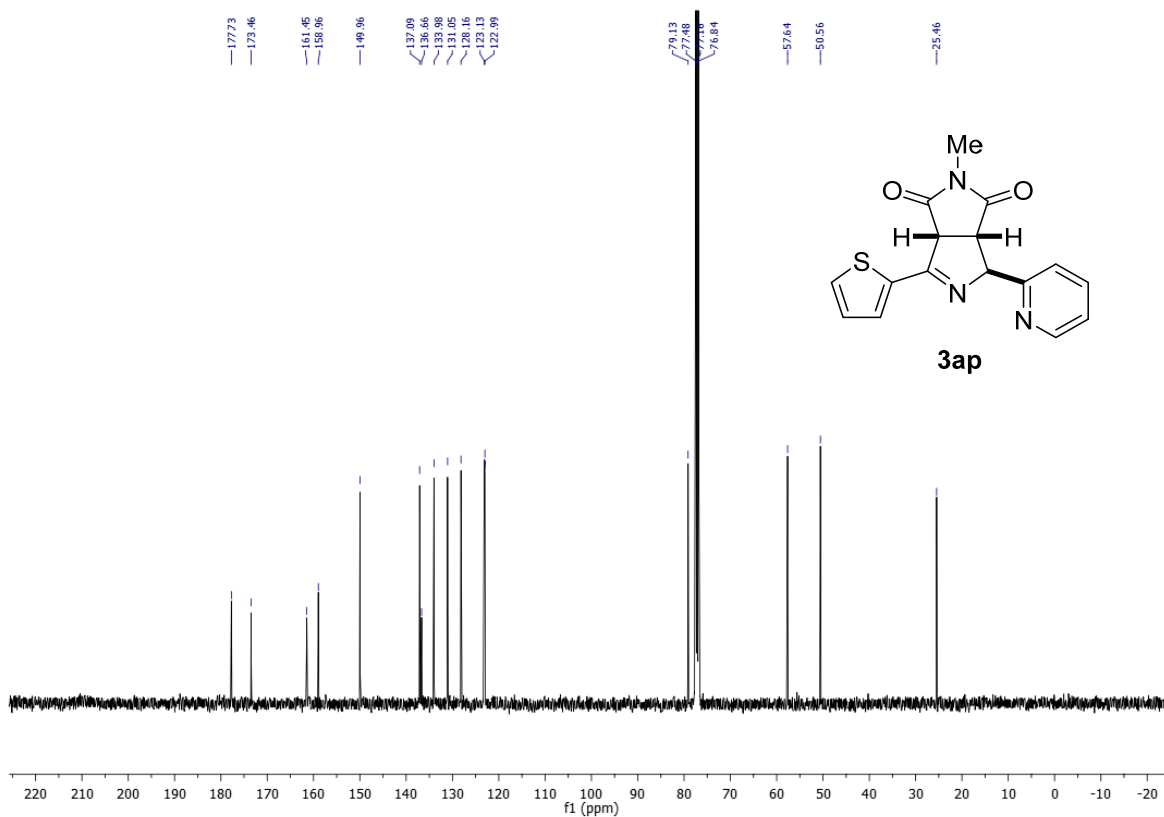

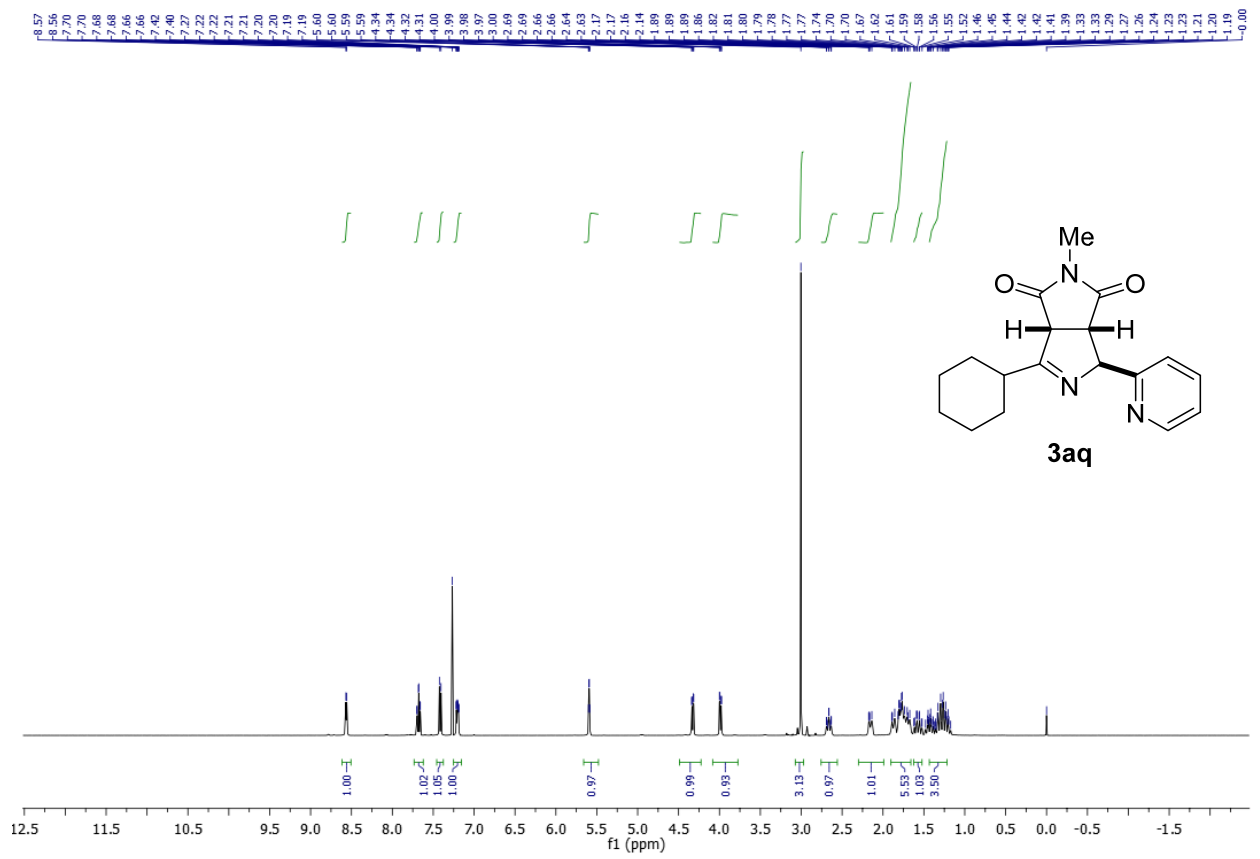

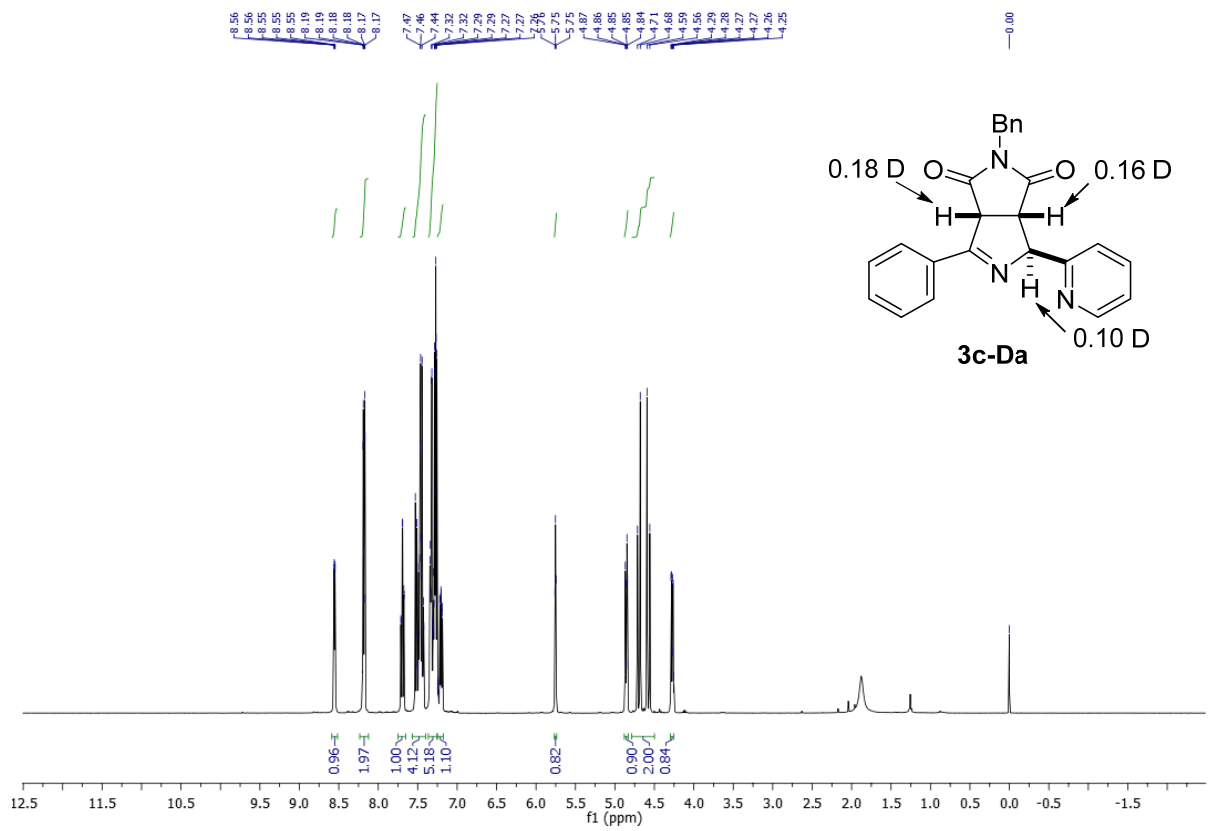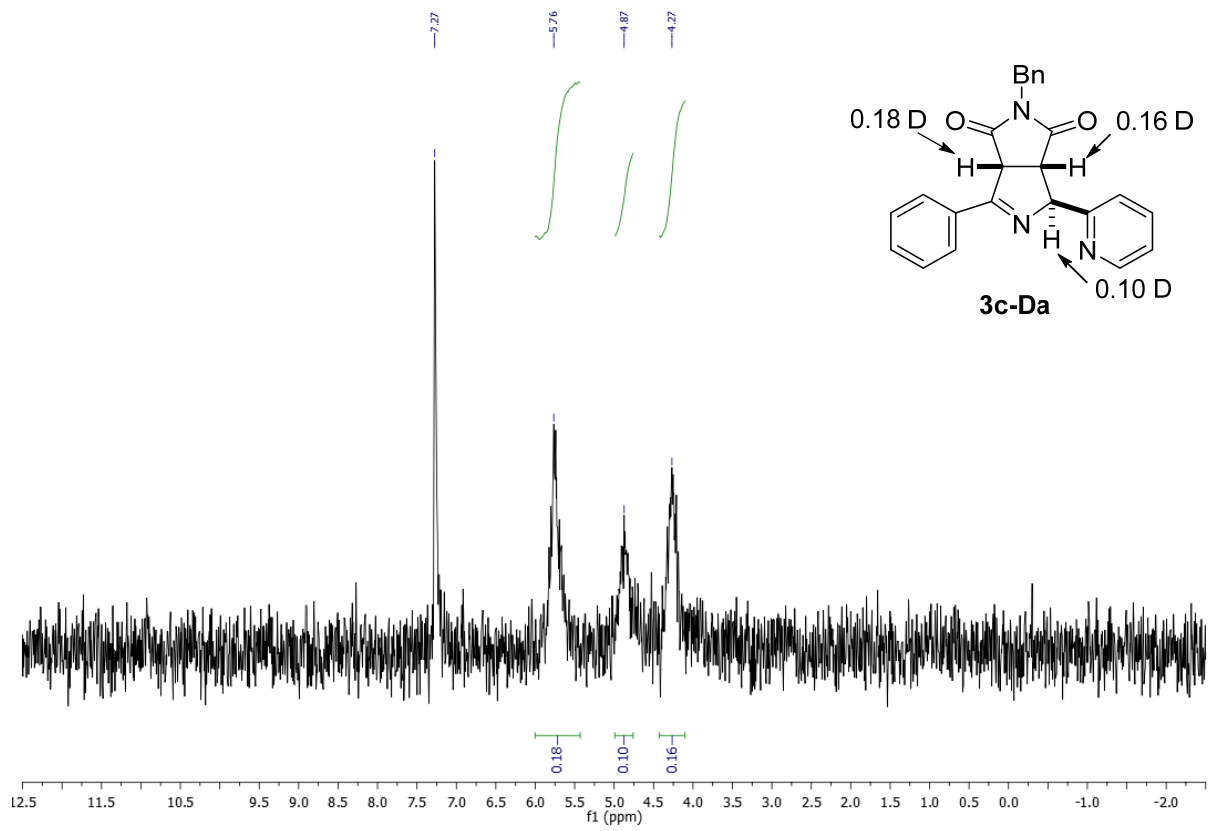

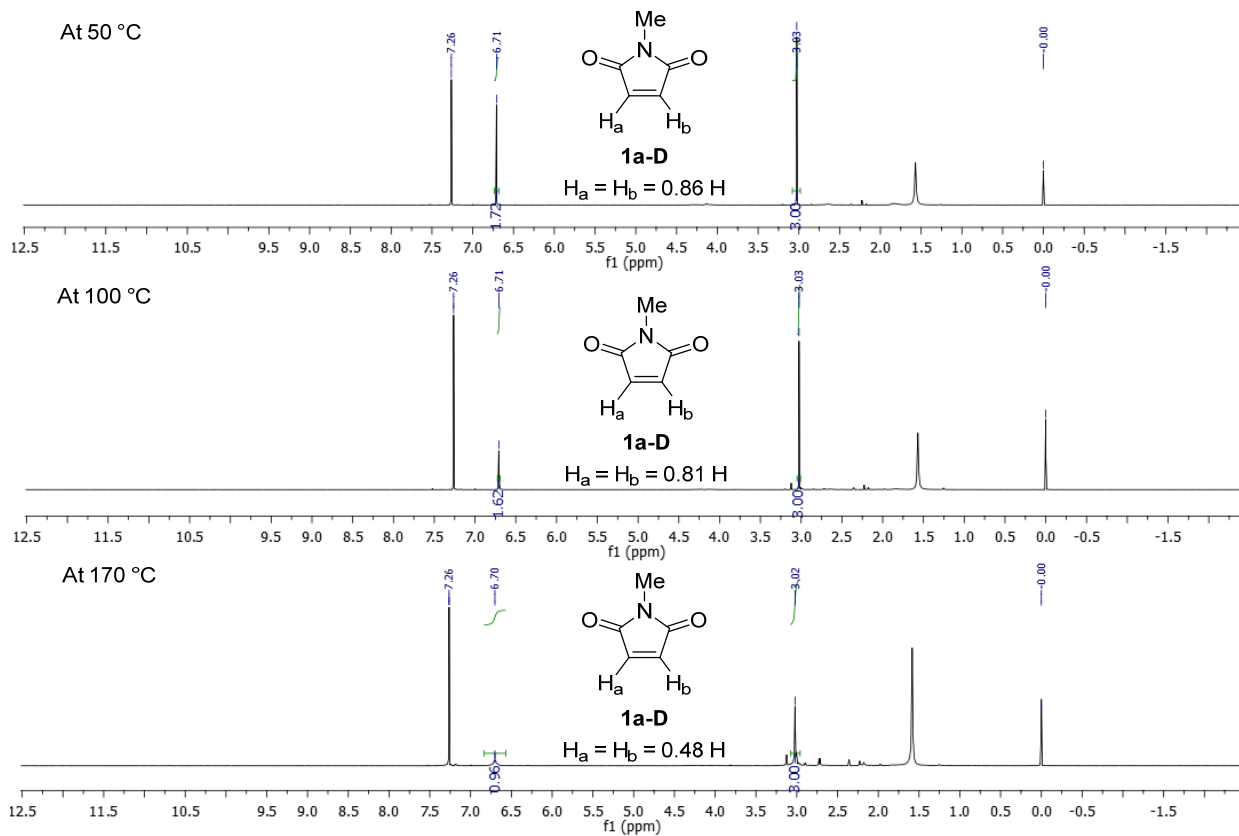



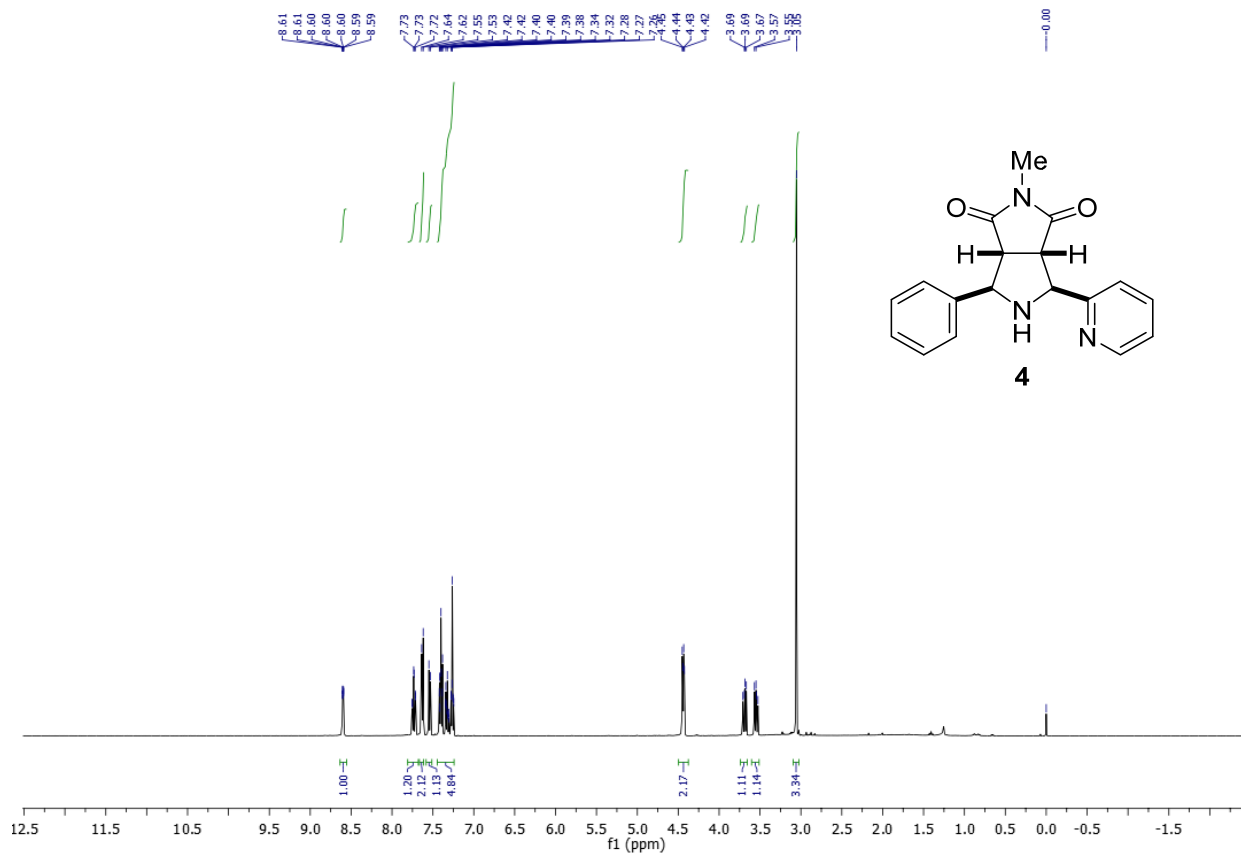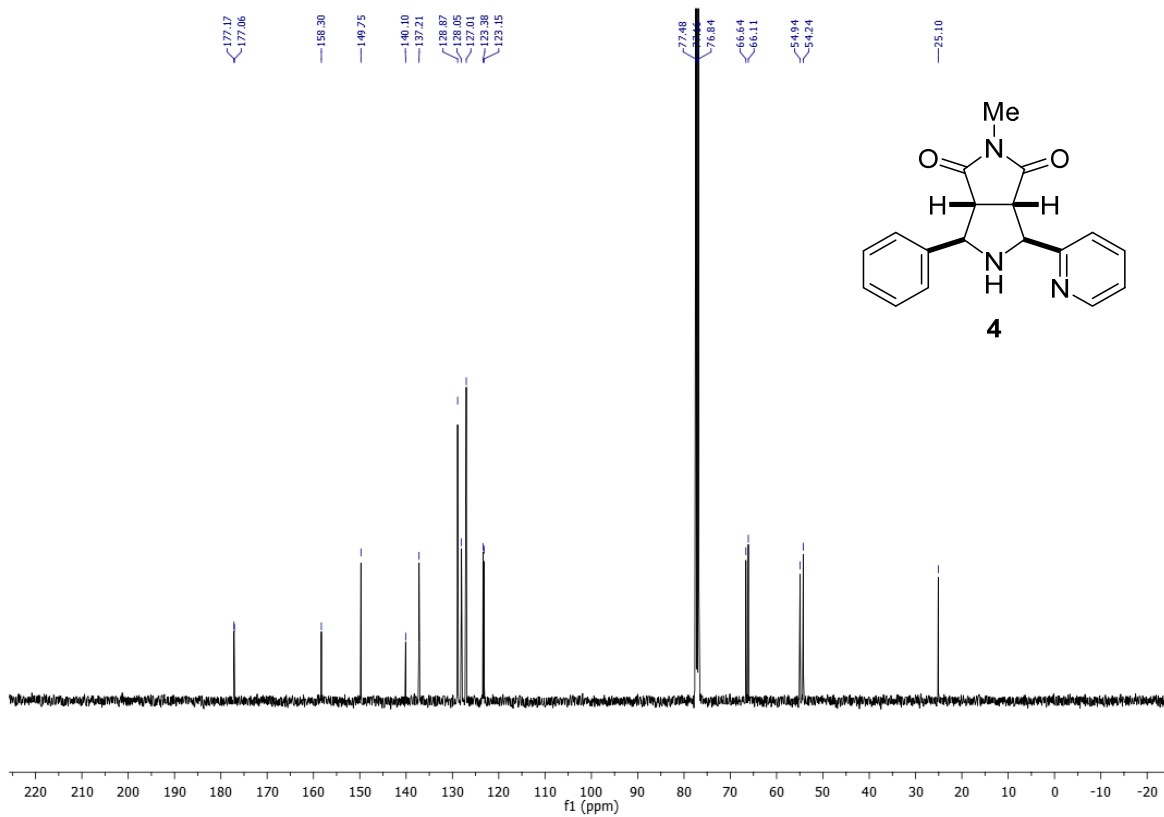

Supplement: d1cc06622f1.pdf [file d1cc06622f1.pdf]
